# Supplementary material for: Prognostic hub gene CBX2 drives a cancer stem cell-like phenotype in HCC revealed by multi-omics and multi-cohorts
Source: Aging (Albany NY). 2023 Nov 17;15(22):12817–51. doi: 10.18632/aging.205173 (PMC10713423; doi:10.18632/aging.205173)
Supplement: Supplementary Table 1 [file aging-15-205173-s002.xlsx]

## Sheet: Table S1
Supplementary Table 1. Genes responsible for the upregulation of 28 DElncRNA, 150 DEmRNA, and 6 DEmiRNA in HCC compared to 24 DElncRNA, 130 DEmRNA, and 2 DEmiRNA in adjacent tissue among these DEGs in two cohorts.
ID	log2FoldChange	Threshold	Gene.type	Gene.name	Cohort
ENSG00000180139	2.52279	Up	lncRNA	ACTA2-AS1	GSE140845
ENSG00000203321	1.46121	Up	lncRNA	CARNMT1-AS1	GSE140845
ENSG00000204380	2.01754	Up	lncRNA	PKP4-AS1	GSE140845
ENSG00000206195	3.56599	Up	lncRNA	DUXAP8	GSE140845
ENSG00000215068	2.27639	Up	lncRNA		GSE140845
ENSG00000215424	1.71258	Up	lncRNA	MCM3AP-AS1	GSE140845
ENSG00000223530	1.35982	Up	lncRNA		GSE140845
ENSG00000224034	2.717	Up	lncRNA	LINC02561	GSE140845
ENSG00000224764	1.79205	Up	lncRNA		GSE140845
ENSG00000225656	1.81785	Up	lncRNA		GSE140845
ENSG00000227409	1.86647	Up	lncRNA	ZMYM4-AS1	GSE140845
ENSG00000228043	1.21646	Up	lncRNA		GSE140845
ENSG00000228139	1.59717	Up	lncRNA	LINC01402	GSE140845
ENSG00000228526	1.90106	Up	lncRNA	MIR34AHG	GSE140845
ENSG00000229431	1.68472	Up	lncRNA	MED8-AS1	GSE140845
ENSG00000229953	2.71399	Up	lncRNA		GSE140845
ENSG00000230084	1.98621	Up	lncRNA		GSE140845
ENSG00000230537	1.54302	Up	lncRNA		GSE140845
ENSG00000230590	2.14729	Up	lncRNA	FTX	GSE140845
ENSG00000231119	2.06416	Up	lncRNA		GSE140845
ENSG00000231703	2.69754	Up	lncRNA		GSE140845
ENSG00000232995	1.09621	Up	lncRNA	RGS5	GSE140845
ENSG00000233144	1.29446	Up	lncRNA		GSE140845
ENSG00000233613	1.78004	Up	lncRNA	DCUN1D2-AS	GSE140845
ENSG00000233651	1.51476	Up	lncRNA		GSE140845
ENSG00000234050	1.35327	Up	lncRNA		GSE140845
ENSG00000234084	1.72442	Up	lncRNA		GSE140845
ENSG00000234149	1.41157	Up	lncRNA		GSE140845
ENSG00000234281	1.87612	Up	lncRNA	LANCL1-AS1	GSE140845
ENSG00000234614	1.48143	Up	lncRNA	C2CD4D-AS1	GSE140845
ENSG00000234912	1.68844	Up	lncRNA	SNHG20	GSE140845
ENSG00000235641	2.31672	Up	lncRNA	LINC00484	GSE140845
ENSG00000236144	1.12453	Up	lncRNA	TMEM147-AS1	GSE140845
ENSG00000237073	1.69301	Up	lncRNA		GSE140845
ENSG00000237373	1.72845	Up	lncRNA	BRWD1-IT1	GSE140845
ENSG00000237646	2.10759	Up	lncRNA	HLCS-IT1	GSE140845
ENSG00000240498	3.32708	Up	lncRNA	CDKN2B-AS1	GSE140845
ENSG00000241449	2.92719	Up	lncRNA		GSE140845
ENSG00000242553	1.59748	Up	lncRNA		GSE140845
ENSG00000246790	1.78434	Up	lncRNA		GSE140845
ENSG00000253532	1.76649	Up	lncRNA		GSE140845
ENSG00000254205	2.00522	Up	lncRNA		GSE140845
ENSG00000257279	1.88659	Up	lncRNA		GSE140845
ENSG00000258545	1.4196	Up	lncRNA	RHOXF1-AS1	GSE140845
ENSG00000259498	3.50765	Up	lncRNA	TPM1-AS	GSE140845
ENSG00000259723	1.49325	Up	lncRNA		GSE140845
ENSG00000260635	2.52637	Up	lncRNA		GSE140845
ENSG00000261126	1.44419	Up	lncRNA	RBFADN	GSE140845
ENSG00000261546	1.47665	Up	lncRNA		GSE140845
ENSG00000265142	2.17956	Up	lncRNA	MIR133A1HG	GSE140845
ENSG00000265194	2.50898	Up	lncRNA		GSE140845
ENSG00000266446	2.93734	Up	lncRNA		GSE140845
ENSG00000267002	1.0406	Up	lncRNA		GSE140845
ENSG00000267216	1.92144	Up	lncRNA	ZNF8-ERVK3-1	GSE140845
ENSG00000267734	2.35963	Up	lncRNA		GSE140845
ENSG00000267762	1.84808	Up	lncRNA		GSE140845
ENSG00000268873	2.44893	Up	lncRNA		GSE140845
ENSG00000269148	2.01399	Up	lncRNA		GSE140845
ENSG00000270115	1.66847	Up	lncRNA		GSE140845
ENSG00000270147	1.38862	Up	lncRNA		GSE140845
ENSG00000270184	1.39919	Up	lncRNA		GSE140845
ENSG00000271218	1.59248	Up	lncRNA		GSE140845
ENSG00000272068	3.58263	Up	lncRNA	BCAN-AS1	GSE140845
ENSG00000272240	2.38822	Up	lncRNA		GSE140845
ENSG00000272254	1.21836	Up	lncRNA		GSE140845
ENSG00000272405	5.68455	Up	lncRNA		GSE140845
ENSG00000272416	1.46232	Up	lncRNA		GSE140845
ENSG00000272420	1.24168	Up	lncRNA		GSE140845
ENSG00000272465	1.5685	Up	lncRNA		GSE140845
ENSG00000272980	1.93867	Up	lncRNA		GSE140845
ENSG00000273179	1.99223	Up	lncRNA		GSE140845
ENSG00000273243	2.14185	Up	lncRNA		GSE140845
ENSG00000273308	1.54432	Up	lncRNA		GSE140845
ENSG00000273329	2.0967	Up	lncRNA		GSE140845
ENSG00000273373	2.5516	Up	lncRNA		GSE140845
ENSG00000183154	-2.57631	Down	lncRNA		GSE140845
ENSG00000197180	-1.23747	Down	lncRNA	CH17-340M24.3	GSE140845
ENSG00000203900	-4.17128	Down	lncRNA		GSE140845
ENSG00000223956	-2.59741	Down	lncRNA	LINC01767	GSE140845
ENSG00000225765	-4.30994	Down	lncRNA	LINC01831	GSE140845
ENSG00000225792	-2.2123	Down	lncRNA		GSE140845
ENSG00000225936	-1.52913	Down	lncRNA		GSE140845
ENSG00000226622	-2.29723	Down	lncRNA		GSE140845
ENSG00000226733	-5.08786	Down	lncRNA		GSE140845
ENSG00000228826	-2.4305	Down	lncRNA		GSE140845
ENSG00000228980	-1.75126	Down	lncRNA	LINC01205	GSE140845
ENSG00000230921	-3.39635	Down	lncRNA	HAO2-IT1	GSE140845
ENSG00000233223	-1.37012	Down	lncRNA		GSE140845
ENSG00000233554	-1.88475	Down	lncRNA	B4GALT1-AS1	GSE140845
ENSG00000234223	-1.85622	Down	lncRNA		GSE140845
ENSG00000237337	-2.61585	Down	lncRNA	ELAVL4-AS1	GSE140845
ENSG00000238099	-3.19702	Down	lncRNA	LINC01625	GSE140845
ENSG00000242741	-1.93508	Down	lncRNA	LINC02005	GSE140845
ENSG00000243694	-4.21254	Down	lncRNA	LINC02027	GSE140845
ENSG00000248740	-3.95512	Down	lncRNA	LINC02428	GSE140845
ENSG00000248884	-3.50651	Down	lncRNA		GSE140845
ENSG00000249173	-5.42925	Down	lncRNA	LINC01093	GSE140845
ENSG00000250333	-1.57673	Down	lncRNA		GSE140845
ENSG00000251061	-1.6257	Down	lncRNA	LINC02512	GSE140845
ENSG00000253549	-1.42494	Down	lncRNA	CA3-AS1	GSE140845
ENSG00000253696	-2.32138	Down	lncRNA	KBTBD11-OT1	GSE140845
ENSG00000254429	-1.90141	Down	lncRNA		GSE140845
ENSG00000255980	-1.7689	Down	lncRNA		GSE140845
ENSG00000256948	-2.35135	Down	lncRNA		GSE140845
ENSG00000259094	-3.53402	Down	lncRNA		GSE140845
ENSG00000259881	-3.43179	Down	lncRNA		GSE140845
ENSG00000261481	-1.16483	Down	lncRNA	CARHSP1-DT	GSE140845
ENSG00000263586	-1.43439	Down	lncRNA	HID1-AS1	GSE140845
ENSG00000265352	-1.21108	Down	lncRNA	LINC01899	GSE140845
ENSG00000267363	-1.1102	Down	lncRNA		GSE140845
ENSG00000272288	-1.22651	Down	lncRNA	ILRUN-AS1	GSE140845
ENSG00000273061	-1.68498	Down	lncRNA	CDC37L1-DT	GSE140845
ENSG00000273341	-1.72068	Down	lncRNA		GSE140845
ENSG00000082929	1.2515	Up	lncRNA	LINC01587	TCGA-LIHC
ENSG00000099869	1.83113	Up	lncRNA	IGF2-AS	TCGA-LIHC
ENSG00000125462	2.52658	Up	lncRNA	MIR9-1HG	TCGA-LIHC
ENSG00000125804	1.43424	Up	lncRNA	FAM182A	TCGA-LIHC
ENSG00000132204	1.54648	Up	lncRNA	LINC00470	TCGA-LIHC
ENSG00000152931	5.96646	Up	lncRNA	PART1	TCGA-LIHC
ENSG00000157306	1.18898	Up	lncRNA	ZFHX2-AS1	TCGA-LIHC
ENSG00000162888	1.21288	Up	lncRNA	C1orf147	TCGA-LIHC
ENSG00000162913	1.31635	Up	lncRNA	OBSCN-AS1	TCGA-LIHC
ENSG00000163364	3.11339	Up	lncRNA	LINC01116	TCGA-LIHC
ENSG00000163915	3.49988	Up	lncRNA	IGF2BP2-AS1	TCGA-LIHC
ENSG00000172965	1.85386	Up	lncRNA	MIR4435-2HG	TCGA-LIHC
ENSG00000173077	1.60119	Up	lncRNA	DELEC1	TCGA-LIHC
ENSG00000173811	1.43246	Up	lncRNA	CCDC13-AS1	TCGA-LIHC
ENSG00000174171	1.00391	Up	lncRNA		TCGA-LIHC
ENSG00000175170	2.1202	Up	lncRNA	FAM182B	TCGA-LIHC
ENSG00000175746	1.0828	Up	lncRNA	C15orf54	TCGA-LIHC
ENSG00000176515	2.08742	Up	lncRNA		TCGA-LIHC
ENSG00000176912	1.28059	Up	lncRNA	TYMSOS	TCGA-LIHC
ENSG00000176984	1.29973	Up	lncRNA		TCGA-LIHC
ENSG00000177133	1.58088	Up	lncRNA	PRDM16-DT	TCGA-LIHC
ENSG00000177699	2.26236	Up	lncRNA		TCGA-LIHC
ENSG00000177800	1.56924	Up	lncRNA	TMEM78	TCGA-LIHC
ENSG00000179066	1.99942	Up	lncRNA		TCGA-LIHC
ENSG00000179082	1.1121	Up	lncRNA	C9orf106	TCGA-LIHC
ENSG00000179428	1.44231	Up	lncRNA	IL6-AS1	TCGA-LIHC
ENSG00000180066	3.62077	Up	lncRNA	LINC02870	TCGA-LIHC
ENSG00000180422	1.36857	Up	lncRNA	LINC00304	TCGA-LIHC
ENSG00000180458	2.0685	Up	lncRNA		TCGA-LIHC
ENSG00000180861	2.21652	Up	lncRNA	LINC01559	TCGA-LIHC
ENSG00000181097	1.41702	Up	lncRNA	LINC02878	TCGA-LIHC
ENSG00000181577	4.29356	Up	lncRNA	C6orf223	TCGA-LIHC
ENSG00000181800	2.04051	Up	lncRNA	CELF2-AS1	TCGA-LIHC
ENSG00000182366	3.20569	Up	lncRNA	FAM87A	TCGA-LIHC
ENSG00000182912	2.70038	Up	lncRNA	TSPEAR-AS2	TCGA-LIHC
ENSG00000183242	1.98289	Up	lncRNA	WT1-AS	TCGA-LIHC
ENSG00000184029	8.58475	Up	lncRNA	DSCR4	TCGA-LIHC
ENSG00000184068	1.59194	Up	lncRNA	SREBF2-AS1	TCGA-LIHC
ENSG00000184856	1.92156	Up	lncRNA	LINC00308	TCGA-LIHC
ENSG00000185168	1.76167	Up	lncRNA	LINC00482	TCGA-LIHC
ENSG00000185904	1.24468	Up	lncRNA	LINC00839	TCGA-LIHC
ENSG00000186019	1.87701	Up	lncRNA		TCGA-LIHC
ENSG00000187013	2.98723	Up	lncRNA	LINC02875	TCGA-LIHC
ENSG00000187621	2.86889	Up	lncRNA	TCL6	TCGA-LIHC
ENSG00000187951	2.11049	Up	lncRNA		TCGA-LIHC
ENSG00000188004	1.26466	Up	lncRNA	SNHG28	TCGA-LIHC
ENSG00000188242	1.20567	Up	lncRNA	PP7080	TCGA-LIHC
ENSG00000188365	1.33024	Up	lncRNA		TCGA-LIHC
ENSG00000189223	1.01683	Up	lncRNA	PAX8-AS1	TCGA-LIHC
ENSG00000189229	5.0234	Up	lncRNA		TCGA-LIHC
ENSG00000189275	3.02461	Up	lncRNA	LINC01164	TCGA-LIHC
ENSG00000196167	1.81456	Up	lncRNA	COLCA1	TCGA-LIHC
ENSG00000196295	1.09948	Up	lncRNA	GARS1-DT	TCGA-LIHC
ENSG00000196366	1.40746	Up	lncRNA	C9orf163	TCGA-LIHC
ENSG00000196668	2.13958	Up	lncRNA	LINC00173	TCGA-LIHC
ENSG00000197085	6.56995	Up	lncRNA	NPSR1-AS1	TCGA-LIHC
ENSG00000197251	1.97774	Up	lncRNA	LINC00336	TCGA-LIHC
ENSG00000197291	1.13645	Up	lncRNA	RAMP2-AS1	TCGA-LIHC
ENSG00000197301	1.78268	Up	lncRNA	HMGA2-AS1	TCGA-LIHC
ENSG00000197989	1.27263	Up	lncRNA	SNHG12	TCGA-LIHC
ENSG00000198054	8.03516	Up	lncRNA	DSCR8	TCGA-LIHC
ENSG00000198358	1.7707	Up	lncRNA		TCGA-LIHC
ENSG00000198468	1.59348	Up	lncRNA	FLVCR1-DT	TCGA-LIHC
ENSG00000203279	2.47148	Up	lncRNA		TCGA-LIHC
ENSG00000203288	1.78868	Up	lncRNA	TDRKH-AS1	TCGA-LIHC
ENSG00000203362	1.04771	Up	lncRNA	POLH-AS1	TCGA-LIHC
ENSG00000203446	1.20113	Up	lncRNA	SUGCT-AS1	TCGA-LIHC
ENSG00000203585	1.62515	Up	lncRNA	LINC02408	TCGA-LIHC
ENSG00000203588	1.02027	Up	lncRNA	IGBP1-AS1	TCGA-LIHC
ENSG00000203645	3.12782	Up	lncRNA	LINC00501	TCGA-LIHC
ENSG00000203684	2.26126	Up	lncRNA	IBA57-DT	TCGA-LIHC
ENSG00000203688	1.42493	Up	lncRNA	LINC02487	TCGA-LIHC
ENSG00000203706	2.6743	Up	lncRNA	SERTAD4-AS1	TCGA-LIHC
ENSG00000203721	1.64581	Up	lncRNA	LINC00862	TCGA-LIHC
ENSG00000203729	2.47436	Up	lncRNA	LINC00272	TCGA-LIHC
ENSG00000203801	1.07316	Up	lncRNA	LINC00222	TCGA-LIHC
ENSG00000203808	1.48166	Up	lncRNA	BVES-AS1	TCGA-LIHC
ENSG00000203930	2.7828	Up	lncRNA	LINC00632	TCGA-LIHC
ENSG00000203971	2.26288	Up	lncRNA		TCGA-LIHC
ENSG00000204044	2.41268	Up	lncRNA	SLC12A5-AS1	TCGA-LIHC
ENSG00000204091	2.57104	Up	lncRNA	TDRG1	TCGA-LIHC
ENSG00000204117	1.52054	Up	lncRNA		TCGA-LIHC
ENSG00000204277	1.48637	Up	lncRNA	LINC01993	TCGA-LIHC
ENSG00000204380	1.53221	Up	lncRNA	PKP4-AS1	TCGA-LIHC
ENSG00000204387	1.18928	Up	lncRNA	SNHG32	TCGA-LIHC
ENSG00000204528	1.92946	Up	lncRNA	PSORS1C3	TCGA-LIHC
ENSG00000204584	1.44518	Up	lncRNA		TCGA-LIHC
ENSG00000204603	3.06443	Up	lncRNA	LINC01257	TCGA-LIHC
ENSG00000204625	1.73085	Up	lncRNA	HCG9	TCGA-LIHC
ENSG00000204666	1.12905	Up	lncRNA		TCGA-LIHC
ENSG00000204709	2.01226	Up	lncRNA	LINC01556	TCGA-LIHC
ENSG00000204832	5.71705	Up	lncRNA	ST8SIA6-AS1	TCGA-LIHC
ENSG00000204934	1.34466	Up	lncRNA	ATP6V0E2-AS1	TCGA-LIHC
ENSG00000205054	4.31276	Up	lncRNA	LINC01121	TCGA-LIHC
ENSG00000205334	1.6677	Up	lncRNA	LINC01460	TCGA-LIHC
ENSG00000205628	4.68337	Up	lncRNA	LINC01446	TCGA-LIHC
ENSG00000205634	3.08099	Up	lncRNA	LINC00898	TCGA-LIHC
ENSG00000205740	2.47266	Up	lncRNA		TCGA-LIHC
ENSG00000206129	3.22734	Up	lncRNA		TCGA-LIHC
ENSG00000206195	3.12701	Up	lncRNA	DUXAP8	TCGA-LIHC
ENSG00000206344	1.22936	Up	lncRNA	HCG27	TCGA-LIHC
ENSG00000206417	1.06516	Up	lncRNA	H1-10-AS1	TCGA-LIHC
ENSG00000206567	1.31604	Up	lncRNA		TCGA-LIHC
ENSG00000206573	1.09081	Up	lncRNA	THUMPD3-AS1	TCGA-LIHC
ENSG00000211683	1.67868	Up	lncRNA		TCGA-LIHC
ENSG00000212694	1.67416	Up	lncRNA	LINC01089	TCGA-LIHC
ENSG00000212766	1.07466	Up	lncRNA	EWSAT1	TCGA-LIHC
ENSG00000213057	1.18491	Up	lncRNA	C1orf220	TCGA-LIHC
ENSG00000213279	2.51798	Up	lncRNA		TCGA-LIHC
ENSG00000213468	3.26997	Up	lncRNA	FIRRE	TCGA-LIHC
ENSG00000213742	1.01325	Up	lncRNA	ZNF337-AS1	TCGA-LIHC
ENSG00000213981	3.66589	Up	lncRNA		TCGA-LIHC
ENSG00000213994	1.26353	Up	lncRNA		TCGA-LIHC
ENSG00000214145	1.51816	Up	lncRNA	LINC00887	TCGA-LIHC
ENSG00000214188	1.34164	Up	lncRNA	ST7-OT4	TCGA-LIHC
ENSG00000214248	1.26941	Up	lncRNA		TCGA-LIHC
ENSG00000214353	1.84352	Up	lncRNA	VAC14-AS1	TCGA-LIHC
ENSG00000214381	3.44893	Up	lncRNA	LINC00488	TCGA-LIHC
ENSG00000214546	1.44007	Up	lncRNA		TCGA-LIHC
ENSG00000214548	1.27945	Up	lncRNA	MEG3	TCGA-LIHC
ENSG00000214650	1.05292	Up	lncRNA		TCGA-LIHC
ENSG00000214803	1.6633	Up	lncRNA		TCGA-LIHC
ENSG00000214999	1.42113	Up	lncRNA		TCGA-LIHC
ENSG00000215022	1.34331	Up	lncRNA		TCGA-LIHC
ENSG00000215023	1.6942	Up	lncRNA		TCGA-LIHC
ENSG00000215068	1.52348	Up	lncRNA		TCGA-LIHC
ENSG00000215241	1.03838	Up	lncRNA	LINC02449	TCGA-LIHC
ENSG00000215417	1.12477	Up	lncRNA	MIR17HG	TCGA-LIHC
ENSG00000215424	1.07006	Up	lncRNA	MCM3AP-AS1	TCGA-LIHC
ENSG00000215533	2.02058	Up	lncRNA	LINC00189	TCGA-LIHC
ENSG00000215769	1.03716	Up	lncRNA	ARHGAP27P1-BPTFP1-KPNA2P3	TCGA-LIHC
ENSG00000215808	3.44926	Up	lncRNA	LINC01139	TCGA-LIHC
ENSG00000217702	2.33483	Up	lncRNA		TCGA-LIHC
ENSG00000217825	3.19548	Up	lncRNA		TCGA-LIHC
ENSG00000218672	4.05262	Up	lncRNA		TCGA-LIHC
ENSG00000219665	1.02549	Up	lncRNA	ZNF433-AS1	TCGA-LIHC
ENSG00000221883	1.03529	Up	lncRNA	ARIH2OS	TCGA-LIHC
ENSG00000221953	1.33092	Up	lncRNA	C1orf229	TCGA-LIHC
ENSG00000222030	4.19783	Up	lncRNA	LINC01793	TCGA-LIHC
ENSG00000222033	1.17917	Up	lncRNA	LINC01124	TCGA-LIHC
ENSG00000222041	1.98699	Up	lncRNA	CYTOR	TCGA-LIHC
ENSG00000222047	1.293	Up	lncRNA	C10orf55	TCGA-LIHC
ENSG00000223393	1.22818	Up	lncRNA		TCGA-LIHC
ENSG00000223462	1.90715	Up	lncRNA		TCGA-LIHC
ENSG00000223478	1.02916	Up	lncRNA		TCGA-LIHC
ENSG00000223485	2.35952	Up	lncRNA	LINC01615	TCGA-LIHC
ENSG00000223486	1.68482	Up	lncRNA		TCGA-LIHC
ENSG00000223523	3.43547	Up	lncRNA		TCGA-LIHC
ENSG00000223548	3.46566	Up	lncRNA	ACSL6-AS1	TCGA-LIHC
ENSG00000223561	2.68745	Up	lncRNA		TCGA-LIHC
ENSG00000223608	3.89849	Up	lncRNA	DSCR4-IT1	TCGA-LIHC
ENSG00000223634	1.07724	Up	lncRNA		TCGA-LIHC
ENSG00000223652	1.70746	Up	lncRNA		TCGA-LIHC
ENSG00000223715	2.03762	Up	lncRNA	LINC01208	TCGA-LIHC
ENSG00000223725	1.04829	Up	lncRNA		TCGA-LIHC
ENSG00000223745	1.36487	Up	lncRNA	CCDC18-AS1	TCGA-LIHC
ENSG00000223768	1.55172	Up	lncRNA	LINC00205	TCGA-LIHC
ENSG00000223774	2.4679	Up	lncRNA		TCGA-LIHC
ENSG00000223776	1.27414	Up	lncRNA	LGALS8-AS1	TCGA-LIHC
ENSG00000223791	1.22766	Up	lncRNA	UBE2E1-AS1	TCGA-LIHC
ENSG00000223806	3.0497	Up	lncRNA	LINC00114	TCGA-LIHC
ENSG00000223812	2.77783	Up	lncRNA		TCGA-LIHC
ENSG00000223813	1.56806	Up	lncRNA		TCGA-LIHC
ENSG00000223829	4.76266	Up	lncRNA		TCGA-LIHC
ENSG00000223855	3.0128	Up	lncRNA	HRAT92	TCGA-LIHC
ENSG00000223930	1.82381	Up	lncRNA		TCGA-LIHC
ENSG00000223947	1.20016	Up	lncRNA		TCGA-LIHC
ENSG00000224020	1.26552	Up	lncRNA	MIR181A2HG	TCGA-LIHC
ENSG00000224034	3.48145	Up	lncRNA	LINC02561	TCGA-LIHC
ENSG00000224049	1.50303	Up	lncRNA		TCGA-LIHC
ENSG00000224057	2.49128	Up	lncRNA	EGFR-AS1	TCGA-LIHC
ENSG00000224066	1.55353	Up	lncRNA		TCGA-LIHC
ENSG00000224141	5.8564	Up	lncRNA	MIR548XHG	TCGA-LIHC
ENSG00000224184	1.7308	Up	lncRNA	MIR3681HG	TCGA-LIHC
ENSG00000224186	1.35122	Up	lncRNA	C5orf66	TCGA-LIHC
ENSG00000224189	6.2633	Up	lncRNA	HAGLR	TCGA-LIHC
ENSG00000224222	2.25138	Up	lncRNA	LINC02636	TCGA-LIHC
ENSG00000224231	1.54919	Up	lncRNA	LINC01832	TCGA-LIHC
ENSG00000224251	1.37724	Up	lncRNA		TCGA-LIHC
ENSG00000224271	4.8223	Up	lncRNA		TCGA-LIHC
ENSG00000224292	1.31382	Up	lncRNA		TCGA-LIHC
ENSG00000224349	1.62241	Up	lncRNA	FAM135A-AS1	TCGA-LIHC
ENSG00000224356	1.37312	Up	lncRNA		TCGA-LIHC
ENSG00000224358	2.02021	Up	lncRNA	TMCO1-AS1	TCGA-LIHC
ENSG00000224387	1.33759	Up	lncRNA		TCGA-LIHC
ENSG00000224409	3.39479	Up	lncRNA		TCGA-LIHC
ENSG00000224418	1.7798	Up	lncRNA	STK24-AS1	TCGA-LIHC
ENSG00000224424	1.55347	Up	lncRNA	PRKAR2A-AS1	TCGA-LIHC
ENSG00000224459	2.62856	Up	lncRNA	SLC25A34-AS1	TCGA-LIHC
ENSG00000224468	1.01167	Up	lncRNA	LAMC1-AS1	TCGA-LIHC
ENSG00000224481	2.29368	Up	lncRNA		TCGA-LIHC
ENSG00000224505	1.10288	Up	lncRNA		TCGA-LIHC
ENSG00000224559	1.83198	Up	lncRNA	LINC01087	TCGA-LIHC
ENSG00000224565	1.8807	Up	lncRNA	LINC01754	TCGA-LIHC
ENSG00000224577	2.82379	Up	lncRNA	LINC01117	TCGA-LIHC
ENSG00000224596	1.83952	Up	lncRNA	ZMIZ1-AS1	TCGA-LIHC
ENSG00000224794	1.08488	Up	lncRNA		TCGA-LIHC
ENSG00000224805	2.39561	Up	lncRNA	LINC00853	TCGA-LIHC
ENSG00000224810	1.90045	Up	lncRNA		TCGA-LIHC
ENSG00000224812	1.03957	Up	lncRNA	TMEM72-AS1	TCGA-LIHC
ENSG00000224814	1.90441	Up	lncRNA		TCGA-LIHC
ENSG00000224854	3.43841	Up	lncRNA	CDKN2A-DT	TCGA-LIHC
ENSG00000224893	2.65864	Up	lncRNA	LINC02840	TCGA-LIHC
ENSG00000224903	1.20255	Up	lncRNA	RNF32-AS1	TCGA-LIHC
ENSG00000224939	1.90116	Up	lncRNA	LINC00184	TCGA-LIHC
ENSG00000224945	1.61039	Up	lncRNA		TCGA-LIHC
ENSG00000224985	1.147	Up	lncRNA		TCGA-LIHC
ENSG00000225007	2.49918	Up	lncRNA		TCGA-LIHC
ENSG00000225087	3.32962	Up	lncRNA		TCGA-LIHC
ENSG00000225096	1.15603	Up	lncRNA		TCGA-LIHC
ENSG00000225138	2.12396	Up	lncRNA	SLC9A3-AS1	TCGA-LIHC
ENSG00000225156	1.58388	Up	lncRNA		TCGA-LIHC
ENSG00000225206	2.27669	Up	lncRNA	MIR137HG	TCGA-LIHC
ENSG00000225218	1.64208	Up	lncRNA		TCGA-LIHC
ENSG00000225255	3.46214	Up	lncRNA	PSLNR	TCGA-LIHC
ENSG00000225328	1.46611	Up	lncRNA	LINC01594	TCGA-LIHC
ENSG00000225329	1.91085	Up	lncRNA	LHFPL3-AS2	TCGA-LIHC
ENSG00000225383	5.42636	Up	lncRNA	SFTA1P	TCGA-LIHC
ENSG00000225399	1.30588	Up	lncRNA		TCGA-LIHC
ENSG00000225420	2.73021	Up	lncRNA		TCGA-LIHC
ENSG00000225431	1.20823	Up	lncRNA	LINC01671	TCGA-LIHC
ENSG00000225465	1.19007	Up	lncRNA	RFPL1S	TCGA-LIHC
ENSG00000225506	1.99252	Up	lncRNA	CYP4A22-AS1	TCGA-LIHC
ENSG00000225518	2.3544	Up	lncRNA	LINC01703	TCGA-LIHC
ENSG00000225532	4.56262	Up	lncRNA		TCGA-LIHC
ENSG00000225542	4.29139	Up	lncRNA	ZNF385D-AS1	TCGA-LIHC
ENSG00000225546	7.33531	Up	lncRNA	LINC02476	TCGA-LIHC
ENSG00000225548	7.37713	Up	lncRNA	LINC01980	TCGA-LIHC
ENSG00000225578	1.03019	Up	lncRNA	NCBP2-AS1	TCGA-LIHC
ENSG00000225611	1.2321	Up	lncRNA	LINC02158	TCGA-LIHC
ENSG00000225647	1.49671	Up	lncRNA		TCGA-LIHC
ENSG00000225649	1.21934	Up	lncRNA		TCGA-LIHC
ENSG00000225656	3.56581	Up	lncRNA		TCGA-LIHC
ENSG00000225676	2.47763	Up	lncRNA		TCGA-LIHC
ENSG00000225680	3.73292	Up	lncRNA		TCGA-LIHC
ENSG00000225684	1.4535	Up	lncRNA	FAM225B	TCGA-LIHC
ENSG00000225689	1.5277	Up	lncRNA		TCGA-LIHC
ENSG00000225721	1.14207	Up	lncRNA		TCGA-LIHC
ENSG00000225744	2.08677	Up	lncRNA		TCGA-LIHC
ENSG00000225746	1.5014	Up	lncRNA	MEG8	TCGA-LIHC
ENSG00000225762	1.89112	Up	lncRNA	LINC01389	TCGA-LIHC
ENSG00000225783	1.1295	Up	lncRNA	MIAT	TCGA-LIHC
ENSG00000225785	1.74814	Up	lncRNA		TCGA-LIHC
ENSG00000225855	1.81468	Up	lncRNA	RUSC1-AS1	TCGA-LIHC
ENSG00000225857	1.53881	Up	lncRNA	LINC02816	TCGA-LIHC
ENSG00000225891	1.12655	Up	lncRNA	DHDDS-AS1	TCGA-LIHC
ENSG00000225905	1.97351	Up	lncRNA		TCGA-LIHC
ENSG00000225940	1.70317	Up	lncRNA	C5orf67	TCGA-LIHC
ENSG00000225953	1.70223	Up	lncRNA	SATB2-AS1	TCGA-LIHC
ENSG00000225981	1.31286	Up	lncRNA		TCGA-LIHC
ENSG00000226017	1.49161	Up	lncRNA	PRICKLE2-AS3	TCGA-LIHC
ENSG00000226043	2.55719	Up	lncRNA		TCGA-LIHC
ENSG00000226087	1.5619	Up	lncRNA		TCGA-LIHC
ENSG00000226088	1.79093	Up	lncRNA	HHLA3-AS1	TCGA-LIHC
ENSG00000226101	1.48765	Up	lncRNA	LINC02097	TCGA-LIHC
ENSG00000226149	1.50859	Up	lncRNA		TCGA-LIHC
ENSG00000226179	2.13343	Up	lncRNA	LINC00685	TCGA-LIHC
ENSG00000226180	1.17851	Up	lncRNA		TCGA-LIHC
ENSG00000226197	1.77664	Up	lncRNA		TCGA-LIHC
ENSG00000226206	1.61348	Up	lncRNA		TCGA-LIHC
ENSG00000226239	1.00908	Up	lncRNA		TCGA-LIHC
ENSG00000226245	1.1508	Up	lncRNA	ZNF32-AS1	TCGA-LIHC
ENSG00000226330	3.12691	Up	lncRNA		TCGA-LIHC
ENSG00000226355	1.59649	Up	lncRNA		TCGA-LIHC
ENSG00000226363	4.70629	Up	lncRNA	HAGLROS	TCGA-LIHC
ENSG00000226383	1.93625	Up	lncRNA	LINC01876	TCGA-LIHC
ENSG00000226416	2.09512	Up	lncRNA	MRPL23-AS1	TCGA-LIHC
ENSG00000226454	2.19188	Up	lncRNA		TCGA-LIHC
ENSG00000226476	5.18805	Up	lncRNA	LINC01748	TCGA-LIHC
ENSG00000226510	3.47946	Up	lncRNA	UPK1A-AS1	TCGA-LIHC
ENSG00000226581	1.17477	Up	lncRNA	LINC02848	TCGA-LIHC
ENSG00000226609	1.51609	Up	lncRNA		TCGA-LIHC
ENSG00000226644	2.31692	Up	lncRNA		TCGA-LIHC
ENSG00000226648	1.00797	Up	lncRNA	PLCG1-AS1	TCGA-LIHC
ENSG00000226669	1.4311	Up	lncRNA		TCGA-LIHC
ENSG00000226673	2.96954	Up	lncRNA	LINC01108	TCGA-LIHC
ENSG00000226674	3.26965	Up	lncRNA	TEX41	TCGA-LIHC
ENSG00000226686	3.5199	Up	lncRNA	LINC01535	TCGA-LIHC
ENSG00000226696	1.50424	Up	lncRNA	LENG8-AS1	TCGA-LIHC
ENSG00000226702	3.81401	Up	lncRNA	MIR217HG	TCGA-LIHC
ENSG00000226706	1.02022	Up	lncRNA		TCGA-LIHC
ENSG00000226747	1.79829	Up	lncRNA	FSIP2-AS2	TCGA-LIHC
ENSG00000226812	1.08571	Up	lncRNA		TCGA-LIHC
ENSG00000226825	2.32409	Up	lncRNA	LINC01509	TCGA-LIHC
ENSG00000226835	1.51567	Up	lncRNA	ARHGAP29-AS1	TCGA-LIHC
ENSG00000226849	1.38089	Up	lncRNA		TCGA-LIHC
ENSG00000226869	2.29906	Up	lncRNA	LHFPL3-AS1	TCGA-LIHC
ENSG00000226900	1.97208	Up	lncRNA		TCGA-LIHC
ENSG00000226913	1.60127	Up	lncRNA	BSN-DT	TCGA-LIHC
ENSG00000226965	2.04963	Up	lncRNA		TCGA-LIHC
ENSG00000227017	2.48228	Up	lncRNA		TCGA-LIHC
ENSG00000227036	3.34477	Up	lncRNA	LINC00511	TCGA-LIHC
ENSG00000227045	1.13589	Up	lncRNA		TCGA-LIHC
ENSG00000227053	1.24533	Up	lncRNA	MUC12-AS1	TCGA-LIHC
ENSG00000227066	1.61471	Up	lncRNA		TCGA-LIHC
ENSG00000227071	1.35368	Up	lncRNA	FOCAD-AS1	TCGA-LIHC
ENSG00000227076	1.25457	Up	lncRNA		TCGA-LIHC
ENSG00000227083	1.77988	Up	lncRNA		TCGA-LIHC
ENSG00000227107	1.80035	Up	lncRNA		TCGA-LIHC
ENSG00000227115	4.68455	Up	lncRNA	LINC01630	TCGA-LIHC
ENSG00000227128	2.41516	Up	lncRNA	LBX1-AS1	TCGA-LIHC
ENSG00000227131	3.08123	Up	lncRNA		TCGA-LIHC
ENSG00000227145	2.74728	Up	lncRNA	IL21-AS1	TCGA-LIHC
ENSG00000227195	5.18885	Up	lncRNA	MIR663AHG	TCGA-LIHC
ENSG00000227210	1.11984	Up	lncRNA		TCGA-LIHC
ENSG00000227256	1.69136	Up	lncRNA	MIS18A-AS1	TCGA-LIHC
ENSG00000227355	1.05694	Up	lncRNA		TCGA-LIHC
ENSG00000227388	1.85651	Up	lncRNA		TCGA-LIHC
ENSG00000227431	1.09777	Up	lncRNA	CSE1L-AS1	TCGA-LIHC
ENSG00000227487	1.55139	Up	lncRNA	NCAM1-AS1	TCGA-LIHC
ENSG00000227496	1.61151	Up	lncRNA		TCGA-LIHC
ENSG00000227517	2.59973	Up	lncRNA	LINC01483	TCGA-LIHC
ENSG00000227533	1.03663	Up	lncRNA	SLC2A1-AS1	TCGA-LIHC
ENSG00000227540	1.76795	Up	lncRNA	DNAJC9-AS1	TCGA-LIHC
ENSG00000227589	2.4523	Up	lncRNA	TP73-AS3	TCGA-LIHC
ENSG00000227619	3.71714	Up	lncRNA		TCGA-LIHC
ENSG00000227630	1.10071	Up	lncRNA	LINC01132	TCGA-LIHC
ENSG00000227640	2.54582	Up	lncRNA	SOX21-AS1	TCGA-LIHC
ENSG00000227674	6.42968	Up	lncRNA	LINC00355	TCGA-LIHC
ENSG00000227683	2.67666	Up	lncRNA		TCGA-LIHC
ENSG00000227698	1.75042	Up	lncRNA		TCGA-LIHC
ENSG00000227706	3.11232	Up	lncRNA		TCGA-LIHC
ENSG00000227719	1.30946	Up	lncRNA		TCGA-LIHC
ENSG00000227733	3.29736	Up	lncRNA		TCGA-LIHC
ENSG00000227740	1.25599	Up	lncRNA	LINC02803	TCGA-LIHC
ENSG00000227811	2.20853	Up	lncRNA	INKA2-AS1	TCGA-LIHC
ENSG00000227857	2.85183	Up	lncRNA		TCGA-LIHC
ENSG00000227885	2.6104	Up	lncRNA		TCGA-LIHC
ENSG00000227896	1.46185	Up	lncRNA		TCGA-LIHC
ENSG00000227906	1.35381	Up	lncRNA	SNAP25-AS1	TCGA-LIHC
ENSG00000227908	2.09849	Up	lncRNA	FLJ31104	TCGA-LIHC
ENSG00000227953	1.43571	Up	lncRNA	LINC01341	TCGA-LIHC
ENSG00000228016	1.37885	Up	lncRNA	RAPGEF4-AS1	TCGA-LIHC
ENSG00000228022	2.07862	Up	lncRNA	HCG20	TCGA-LIHC
ENSG00000228033	1.89954	Up	lncRNA		TCGA-LIHC
ENSG00000228037	1.45492	Up	lncRNA		TCGA-LIHC
ENSG00000228044	1.79989	Up	lncRNA		TCGA-LIHC
ENSG00000228109	2.35912	Up	lncRNA	MELTF-AS1	TCGA-LIHC
ENSG00000228115	1.63037	Up	lncRNA		TCGA-LIHC
ENSG00000228126	1.84542	Up	lncRNA	FALEC	TCGA-LIHC
ENSG00000228127	1.9318	Up	lncRNA	LINC01649	TCGA-LIHC
ENSG00000228137	1.25975	Up	lncRNA		TCGA-LIHC
ENSG00000228139	1.15592	Up	lncRNA	LINC01402	TCGA-LIHC
ENSG00000228201	1.04003	Up	lncRNA		TCGA-LIHC
ENSG00000228203	2.37228	Up	lncRNA	GRASLND	TCGA-LIHC
ENSG00000228215	4.22096	Up	lncRNA	LINC02770	TCGA-LIHC
ENSG00000228216	1.98809	Up	lncRNA		TCGA-LIHC
ENSG00000228221	1.81109	Up	lncRNA	LINC00578	TCGA-LIHC
ENSG00000228274	1.57519	Up	lncRNA		TCGA-LIHC
ENSG00000228288	1.621	Up	lncRNA	PCAT6	TCGA-LIHC
ENSG00000228302	1.22638	Up	lncRNA		TCGA-LIHC
ENSG00000228315	1.81578	Up	lncRNA	GUSBP11	TCGA-LIHC
ENSG00000228340	1.25773	Up	lncRNA	MIR646HG	TCGA-LIHC
ENSG00000228350	2.31083	Up	lncRNA	LINC02585	TCGA-LIHC
ENSG00000228352	1.07096	Up	lncRNA		TCGA-LIHC
ENSG00000228353	1.97616	Up	lncRNA		TCGA-LIHC
ENSG00000228393	1.35666	Up	lncRNA	LINC01004	TCGA-LIHC
ENSG00000228444	1.02457	Up	lncRNA		TCGA-LIHC
ENSG00000228470	1.34301	Up	lncRNA		TCGA-LIHC
ENSG00000228487	1.60534	Up	lncRNA		TCGA-LIHC
ENSG00000228509	2.1777	Up	lncRNA		TCGA-LIHC
ENSG00000228561	2.42705	Up	lncRNA		TCGA-LIHC
ENSG00000228620	1.54409	Up	lncRNA		TCGA-LIHC
ENSG00000228714	6.2025	Up	lncRNA		TCGA-LIHC
ENSG00000228718	1.70819	Up	lncRNA	LINC02521	TCGA-LIHC
ENSG00000228719	1.05842	Up	lncRNA		TCGA-LIHC
ENSG00000228723	2.16866	Up	lncRNA	SRGAP3-AS2	TCGA-LIHC
ENSG00000228742	2.55501	Up	lncRNA	LINC02577	TCGA-LIHC
ENSG00000228748	1.57807	Up	lncRNA		TCGA-LIHC
ENSG00000228792	2.17718	Up	lncRNA		TCGA-LIHC
ENSG00000228802	1.39848	Up	lncRNA		TCGA-LIHC
ENSG00000228918	1.09809	Up	lncRNA	LINC01344	TCGA-LIHC
ENSG00000228933	4.5054	Up	lncRNA		TCGA-LIHC
ENSG00000228952	2.91607	Up	lncRNA	LINC02041	TCGA-LIHC
ENSG00000229021	1.24094	Up	lncRNA		TCGA-LIHC
ENSG00000229108	3.06917	Up	lncRNA	LINC02587	TCGA-LIHC
ENSG00000229131	5.44459	Up	lncRNA		TCGA-LIHC
ENSG00000229153	1.18524	Up	lncRNA	EPHA1-AS1	TCGA-LIHC
ENSG00000229155	1.41514	Up	lncRNA	LINC02038	TCGA-LIHC
ENSG00000229167	1.71151	Up	lncRNA		TCGA-LIHC
ENSG00000229178	2.44127	Up	lncRNA		TCGA-LIHC
ENSG00000229191	2.51301	Up	lncRNA		TCGA-LIHC
ENSG00000229205	3.33997	Up	lncRNA	LINC00200	TCGA-LIHC
ENSG00000229227	1.69884	Up	lncRNA		TCGA-LIHC
ENSG00000229258	2.07749	Up	lncRNA	LPGAT1-AS1	TCGA-LIHC
ENSG00000229261	1.73619	Up	lncRNA		TCGA-LIHC
ENSG00000229267	1.70282	Up	lncRNA	SNHG31	TCGA-LIHC
ENSG00000229282	1.05714	Up	lncRNA		TCGA-LIHC
ENSG00000229348	1.44532	Up	lncRNA	HYI-AS1	TCGA-LIHC
ENSG00000229393	2.02456	Up	lncRNA		TCGA-LIHC
ENSG00000229400	1.69518	Up	lncRNA	CNIH3-AS1	TCGA-LIHC
ENSG00000229404	3.40311	Up	lncRNA	LINC00858	TCGA-LIHC
ENSG00000229424	1.52132	Up	lncRNA		TCGA-LIHC
ENSG00000229425	1.46047	Up	lncRNA		TCGA-LIHC
ENSG00000229431	1.24158	Up	lncRNA	MED8-AS1	TCGA-LIHC
ENSG00000229512	1.37723	Up	lncRNA		TCGA-LIHC
ENSG00000229558	4.07194	Up	lncRNA	SACS-AS1	TCGA-LIHC
ENSG00000229588	1.79763	Up	lncRNA		TCGA-LIHC
ENSG00000229647	1.1729	Up	lncRNA	MYOSLID	TCGA-LIHC
ENSG00000229654	1.63067	Up	lncRNA	LINC02526	TCGA-LIHC
ENSG00000229660	1.47107	Up	lncRNA		TCGA-LIHC
ENSG00000229664	1.17678	Up	lncRNA		TCGA-LIHC
ENSG00000229672	2.61884	Up	lncRNA		TCGA-LIHC
ENSG00000229719	1.39775	Up	lncRNA	MIR194-2HG	TCGA-LIHC
ENSG00000229739	1.01762	Up	lncRNA	PDC-AS1	TCGA-LIHC
ENSG00000229751	1.63023	Up	lncRNA		TCGA-LIHC
ENSG00000229780	1.33372	Up	lncRNA	UBE2Q1-AS1	TCGA-LIHC
ENSG00000229832	1.09542	Up	lncRNA		TCGA-LIHC
ENSG00000229869	1.66372	Up	lncRNA		TCGA-LIHC
ENSG00000229876	5.40036	Up	lncRNA	CASC20	TCGA-LIHC
ENSG00000229891	1.38842	Up	lncRNA	LINC01315	TCGA-LIHC
ENSG00000229893	1.36804	Up	lncRNA	TAX1BP1-AS1	TCGA-LIHC
ENSG00000229901	1.92103	Up	lncRNA	FOXO6-AS1	TCGA-LIHC
ENSG00000229941	1.57292	Up	lncRNA	PDE11A-AS1	TCGA-LIHC
ENSG00000229950	4.08449	Up	lncRNA	TFAP2A-AS1	TCGA-LIHC
ENSG00000229951	1.69423	Up	lncRNA	FLJ31356	TCGA-LIHC
ENSG00000229953	3.24961	Up	lncRNA		TCGA-LIHC
ENSG00000229970	4.03387	Up	lncRNA		TCGA-LIHC
ENSG00000229983	1.97272	Up	lncRNA		TCGA-LIHC
ENSG00000230005	1.22678	Up	lncRNA	SNAP47-AS1	TCGA-LIHC
ENSG00000230082	1.3263	Up	lncRNA	PRRT3-AS1	TCGA-LIHC
ENSG00000230126	1.22156	Up	lncRNA	FGF12-AS2	TCGA-LIHC
ENSG00000230131	2.43557	Up	lncRNA	LINC02641	TCGA-LIHC
ENSG00000230234	4.57828	Up	lncRNA		TCGA-LIHC
ENSG00000230269	4.42451	Up	lncRNA	LINC02525	TCGA-LIHC
ENSG00000230316	5.68073	Up	lncRNA	FEZF1-AS1	TCGA-LIHC
ENSG00000230319	1.01952	Up	lncRNA	TTLL1-AS1	TCGA-LIHC
ENSG00000230366	1.57358	Up	lncRNA	DSCR9	TCGA-LIHC
ENSG00000230392	1.97286	Up	lncRNA		TCGA-LIHC
ENSG00000230393	2.30997	Up	lncRNA		TCGA-LIHC
ENSG00000230400	1.98254	Up	lncRNA	LINC01747	TCGA-LIHC
ENSG00000230417	2.65161	Up	lncRNA	LINC00856	TCGA-LIHC
ENSG00000230426	3.88891	Up	lncRNA	LINC01036	TCGA-LIHC
ENSG00000230454	2.14886	Up	lncRNA		TCGA-LIHC
ENSG00000230499	1.67997	Up	lncRNA		TCGA-LIHC
ENSG00000230526	1.76463	Up	lncRNA		TCGA-LIHC
ENSG00000230533	4.32729	Up	lncRNA		TCGA-LIHC
ENSG00000230563	1.88286	Up	lncRNA		TCGA-LIHC
ENSG00000230565	1.12716	Up	lncRNA	ZNF32-AS2	TCGA-LIHC
ENSG00000230606	1.86236	Up	lncRNA		TCGA-LIHC
ENSG00000230612	1.14681	Up	lncRNA		TCGA-LIHC
ENSG00000230615	1.99747	Up	lncRNA		TCGA-LIHC
ENSG00000230676	1.81036	Up	lncRNA		TCGA-LIHC
ENSG00000230695	1.28095	Up	lncRNA		TCGA-LIHC
ENSG00000230699	1.8926	Up	lncRNA		TCGA-LIHC
ENSG00000230710	3.01084	Up	lncRNA	LINC00332	TCGA-LIHC
ENSG00000230733	2.59888	Up	lncRNA		TCGA-LIHC
ENSG00000230736	1.23541	Up	lncRNA		TCGA-LIHC
ENSG00000230753	1.17599	Up	lncRNA	ZNF341-AS1	TCGA-LIHC
ENSG00000230773	1.02914	Up	lncRNA		TCGA-LIHC
ENSG00000230912	1.52874	Up	lncRNA		TCGA-LIHC
ENSG00000230970	1.28267	Up	lncRNA	HHATL-AS1	TCGA-LIHC
ENSG00000230978	2.78431	Up	lncRNA	LINC00160	TCGA-LIHC
ENSG00000230991	3.78573	Up	lncRNA		TCGA-LIHC
ENSG00000231010	1.40415	Up	lncRNA		TCGA-LIHC
ENSG00000231013	2.51244	Up	lncRNA	SCTR-AS1	TCGA-LIHC
ENSG00000231039	1.08775	Up	lncRNA		TCGA-LIHC
ENSG00000231050	1.12228	Up	lncRNA		TCGA-LIHC
ENSG00000231054	1.71639	Up	lncRNA		TCGA-LIHC
ENSG00000231057	2.49113	Up	lncRNA		TCGA-LIHC
ENSG00000231064	1.21326	Up	lncRNA	THBS3-AS1	TCGA-LIHC
ENSG00000231081	1.52802	Up	lncRNA		TCGA-LIHC
ENSG00000231106	3.16948	Up	lncRNA	LINC01436	TCGA-LIHC
ENSG00000231107	2.94081	Up	lncRNA	LINC01508	TCGA-LIHC
ENSG00000231131	3.13699	Up	lncRNA	LNCAROD	TCGA-LIHC
ENSG00000231154	1.2567	Up	lncRNA	MORF4L2-AS1	TCGA-LIHC
ENSG00000231156	2.27526	Up	lncRNA		TCGA-LIHC
ENSG00000231172	3.15894	Up	lncRNA	EVA1A-AS	TCGA-LIHC
ENSG00000231185	1.47051	Up	lncRNA	SPRY4-AS1	TCGA-LIHC
ENSG00000231187	1.18362	Up	lncRNA		TCGA-LIHC
ENSG00000231194	1.6474	Up	lncRNA	FARP1-AS1	TCGA-LIHC
ENSG00000231208	2.78723	Up	lncRNA	ZBTB46-AS1	TCGA-LIHC
ENSG00000231210	1.85593	Up	lncRNA	COMETT	TCGA-LIHC
ENSG00000231226	2.10428	Up	lncRNA	TRIM31-AS1	TCGA-LIHC
ENSG00000231252	3.22154	Up	lncRNA		TCGA-LIHC
ENSG00000231305	1.61493	Up	lncRNA		TCGA-LIHC
ENSG00000231367	1.32143	Up	lncRNA	LINC02613	TCGA-LIHC
ENSG00000231419	3.35953	Up	lncRNA	LINC00689	TCGA-LIHC
ENSG00000231421	4.10403	Up	lncRNA		TCGA-LIHC
ENSG00000231424	1.99088	Up	lncRNA		TCGA-LIHC
ENSG00000231439	2.27843	Up	lncRNA	WASIR2	TCGA-LIHC
ENSG00000231507	1.6647	Up	lncRNA	LINC01353	TCGA-LIHC
ENSG00000231532	3.12478	Up	lncRNA	LINC01249	TCGA-LIHC
ENSG00000231563	2.70601	Up	lncRNA		TCGA-LIHC
ENSG00000231566	2.68188	Up	lncRNA	LINC02595	TCGA-LIHC
ENSG00000231638	1.36646	Up	lncRNA	LUARIS	TCGA-LIHC
ENSG00000231646	1.12836	Up	lncRNA	FSIP2-AS1	TCGA-LIHC
ENSG00000231652	1.21855	Up	lncRNA		TCGA-LIHC
ENSG00000231663	1.06867	Up	lncRNA	COA6-AS1	TCGA-LIHC
ENSG00000231666	3.52635	Up	lncRNA	LINC01704	TCGA-LIHC
ENSG00000231703	1.15868	Up	lncRNA		TCGA-LIHC
ENSG00000231720	2.29827	Up	lncRNA		TCGA-LIHC
ENSG00000231728	1.10288	Up	lncRNA	TMSB15B-AS1	TCGA-LIHC
ENSG00000231748	2.89452	Up	lncRNA		TCGA-LIHC
ENSG00000231764	5.63333	Up	lncRNA	DLX6-AS1	TCGA-LIHC
ENSG00000231769	1.53758	Up	lncRNA		TCGA-LIHC
ENSG00000231776	5.45347	Up	lncRNA	LINC01611	TCGA-LIHC
ENSG00000231789	1.08667	Up	lncRNA	PIK3CD-AS2	TCGA-LIHC
ENSG00000231829	1.44377	Up	lncRNA		TCGA-LIHC
ENSG00000231840	1.14389	Up	lncRNA	TMEM139-AS1	TCGA-LIHC
ENSG00000231851	1.21709	Up	lncRNA	MRPS9-AS1	TCGA-LIHC
ENSG00000231868	1.18075	Up	lncRNA		TCGA-LIHC
ENSG00000231877	3.45842	Up	lncRNA		TCGA-LIHC
ENSG00000231896	1.82386	Up	lncRNA		TCGA-LIHC
ENSG00000231927	1.37558	Up	lncRNA		TCGA-LIHC
ENSG00000232006	2.97923	Up	lncRNA		TCGA-LIHC
ENSG00000232021	3.94149	Up	lncRNA	LEF1-AS1	TCGA-LIHC
ENSG00000232023	2.23391	Up	lncRNA	LINC01807	TCGA-LIHC
ENSG00000232079	4.28255	Up	lncRNA	LINC01697	TCGA-LIHC
ENSG00000232093	1.45998	Up	lncRNA	DCST1-AS1	TCGA-LIHC
ENSG00000232104	1.04162	Up	lncRNA	RFX3-AS1	TCGA-LIHC
ENSG00000232194	1.04478	Up	lncRNA		TCGA-LIHC
ENSG00000232233	2.02484	Up	lncRNA	LINC02043	TCGA-LIHC
ENSG00000232265	2.14538	Up	lncRNA	LINC02805	TCGA-LIHC
ENSG00000232287	1.11768	Up	lncRNA	SLC6A1-AS1	TCGA-LIHC
ENSG00000232294	1.83272	Up	lncRNA		TCGA-LIHC
ENSG00000232306	1.49967	Up	lncRNA		TCGA-LIHC
ENSG00000232352	1.24993	Up	lncRNA	SEMA3B-AS1	TCGA-LIHC
ENSG00000232363	1.74406	Up	lncRNA		TCGA-LIHC
ENSG00000232412	1.27885	Up	lncRNA		TCGA-LIHC
ENSG00000232416	2.75543	Up	lncRNA	BPESC1	TCGA-LIHC
ENSG00000232448	1.59922	Up	lncRNA		TCGA-LIHC
ENSG00000232480	1.32077	Up	lncRNA	TGFB2-AS1	TCGA-LIHC
ENSG00000232485	1.47656	Up	lncRNA	RPL37A-DT	TCGA-LIHC
ENSG00000232519	1.64219	Up	lncRNA		TCGA-LIHC
ENSG00000232527	2.44453	Up	lncRNA	LINC02802	TCGA-LIHC
ENSG00000232536	1.09458	Up	lncRNA		TCGA-LIHC
ENSG00000232555	3.53382	Up	lncRNA		TCGA-LIHC
ENSG00000232560	2.92879	Up	lncRNA	LINC01549	TCGA-LIHC
ENSG00000232586	2.27876	Up	lncRNA	KIAA1614-AS1	TCGA-LIHC
ENSG00000232642	1.0148	Up	lncRNA		TCGA-LIHC
ENSG00000232645	1.22527	Up	lncRNA	LINC01431	TCGA-LIHC
ENSG00000232677	2.79708	Up	lncRNA	LINC00665	TCGA-LIHC
ENSG00000232679	1.51637	Up	lncRNA	LINC01705	TCGA-LIHC
ENSG00000232680	1.74067	Up	lncRNA		TCGA-LIHC
ENSG00000232692	1.89936	Up	lncRNA		TCGA-LIHC
ENSG00000232712	1.2205	Up	lncRNA	KIZ-AS1	TCGA-LIHC
ENSG00000232725	1.66736	Up	lncRNA		TCGA-LIHC
ENSG00000232729	1.24971	Up	lncRNA		TCGA-LIHC
ENSG00000232732	1.51687	Up	lncRNA		TCGA-LIHC
ENSG00000232749	2.13241	Up	lncRNA		TCGA-LIHC
ENSG00000232807	1.10831	Up	lncRNA		TCGA-LIHC
ENSG00000232850	3.61451	Up	lncRNA	PTGES2-AS1	TCGA-LIHC
ENSG00000232874	2.06901	Up	lncRNA		TCGA-LIHC
ENSG00000232909	1.53868	Up	lncRNA		TCGA-LIHC
ENSG00000232940	1.71361	Up	lncRNA	HCG25	TCGA-LIHC
ENSG00000232977	1.47391	Up	lncRNA	LINC00327	TCGA-LIHC
ENSG00000232995	1.54342	Up	lncRNA	RGS5	TCGA-LIHC
ENSG00000233016	1.55955	Up	lncRNA	SNHG7	TCGA-LIHC
ENSG00000233030	1.56786	Up	lncRNA		TCGA-LIHC
ENSG00000233085	2.81868	Up	lncRNA		TCGA-LIHC
ENSG00000233098	1.4234	Up	lncRNA	CCDC144NL-AS1	TCGA-LIHC
ENSG00000233117	1.31388	Up	lncRNA	LINC00702	TCGA-LIHC
ENSG00000233154	2.49721	Up	lncRNA	LINC01762	TCGA-LIHC
ENSG00000233175	1.45178	Up	lncRNA		TCGA-LIHC
ENSG00000233246	1.21681	Up	lncRNA	PHC2-AS1	TCGA-LIHC
ENSG00000233251	1.43463	Up	lncRNA		TCGA-LIHC
ENSG00000233288	3.08761	Up	lncRNA		TCGA-LIHC
ENSG00000233296	1.52277	Up	lncRNA	TMEM18-DT	TCGA-LIHC
ENSG00000233358	3.91205	Up	lncRNA		TCGA-LIHC
ENSG00000233359	4.68518	Up	lncRNA		TCGA-LIHC
ENSG00000233379	2.38008	Up	lncRNA		TCGA-LIHC
ENSG00000233393	1.83823	Up	lncRNA		TCGA-LIHC
ENSG00000233396	1.56102	Up	lncRNA	LINC01719	TCGA-LIHC
ENSG00000233399	1.60993	Up	lncRNA	LINC01648	TCGA-LIHC
ENSG00000233431	1.22982	Up	lncRNA	LINC02596	TCGA-LIHC
ENSG00000233452	1.02248	Up	lncRNA	STXBP5-AS1	TCGA-LIHC
ENSG00000233461	2.23129	Up	lncRNA		TCGA-LIHC
ENSG00000233485	1.5047	Up	lncRNA	FHAD1-AS1	TCGA-LIHC
ENSG00000233515	3.71779	Up	lncRNA	LINC01518	TCGA-LIHC
ENSG00000233532	2.1051	Up	lncRNA	LINC00460	TCGA-LIHC
ENSG00000233539	4.52988	Up	lncRNA		TCGA-LIHC
ENSG00000233542	4.27249	Up	lncRNA		TCGA-LIHC
ENSG00000233547	1.65496	Up	lncRNA		TCGA-LIHC
ENSG00000233559	1.21577	Up	lncRNA	LINC00513	TCGA-LIHC
ENSG00000233610	1.96106	Up	lncRNA	LINC00462	TCGA-LIHC
ENSG00000233613	1.1201	Up	lncRNA	DCUN1D2-AS	TCGA-LIHC
ENSG00000233625	3.15984	Up	lncRNA		TCGA-LIHC
ENSG00000233682	2.10819	Up	lncRNA		TCGA-LIHC
ENSG00000233718	2.9305	Up	lncRNA	MYCNOS	TCGA-LIHC
ENSG00000233766	1.57017	Up	lncRNA	CAVIN2-AS1	TCGA-LIHC
ENSG00000233775	1.60352	Up	lncRNA		TCGA-LIHC
ENSG00000233791	2.55881	Up	lncRNA	LINC01136	TCGA-LIHC
ENSG00000233799	1.30629	Up	lncRNA		TCGA-LIHC
ENSG00000233818	1.33351	Up	lncRNA		TCGA-LIHC
ENSG00000233871	2.35488	Up	lncRNA	DLG5-AS1	TCGA-LIHC
ENSG00000233885	1.0913	Up	lncRNA	YEATS2-AS1	TCGA-LIHC
ENSG00000233922	2.74646	Up	lncRNA	LINC01694	TCGA-LIHC
ENSG00000233928	3.10986	Up	lncRNA		TCGA-LIHC
ENSG00000233930	1.83057	Up	lncRNA	KRTAP5-AS1	TCGA-LIHC
ENSG00000233985	3.21315	Up	lncRNA	LINC01681	TCGA-LIHC
ENSG00000234006	1.56122	Up	lncRNA	DDX39B-AS1	TCGA-LIHC
ENSG00000234129	1.37824	Up	lncRNA		TCGA-LIHC
ENSG00000234134	1.1505	Up	lncRNA		TCGA-LIHC
ENSG00000234142	2.62926	Up	lncRNA	LINC01675	TCGA-LIHC
ENSG00000234147	2.45555	Up	lncRNA		TCGA-LIHC
ENSG00000234183	1.87331	Up	lncRNA	LINC01952	TCGA-LIHC
ENSG00000234215	2.03781	Up	lncRNA	CT66	TCGA-LIHC
ENSG00000234261	1.59294	Up	lncRNA		TCGA-LIHC
ENSG00000234264	2.37483	Up	lncRNA	DEPDC1-AS1	TCGA-LIHC
ENSG00000234283	2.40779	Up	lncRNA	LINC01731	TCGA-LIHC
ENSG00000234311	3.6814	Up	lncRNA		TCGA-LIHC
ENSG00000234327	1.56521	Up	lncRNA	ZNF232-AS1	TCGA-LIHC
ENSG00000234350	1.23326	Up	lncRNA		TCGA-LIHC
ENSG00000234352	2.35062	Up	lncRNA		TCGA-LIHC
ENSG00000234362	1.70318	Up	lncRNA	LINC01914	TCGA-LIHC
ENSG00000234380	2.85715	Up	lncRNA	LINC01426	TCGA-LIHC
ENSG00000234396	1.22702	Up	lncRNA		TCGA-LIHC
ENSG00000234426	3.85298	Up	lncRNA		TCGA-LIHC
ENSG00000234432	1.1961	Up	lncRNA		TCGA-LIHC
ENSG00000234477	1.87324	Up	lncRNA		TCGA-LIHC
ENSG00000234614	1.4945	Up	lncRNA	C2CD4D-AS1	TCGA-LIHC
ENSG00000234678	1.71884	Up	lncRNA	ELF3-AS1	TCGA-LIHC
ENSG00000234690	1.09543	Up	lncRNA	EPCAM-DT	TCGA-LIHC
ENSG00000234692	3.06274	Up	lncRNA		TCGA-LIHC
ENSG00000234694	1.20695	Up	lncRNA		TCGA-LIHC
ENSG00000234722	8.72561	Up	lncRNA	LINC01287	TCGA-LIHC
ENSG00000234741	1.88828	Up	lncRNA	GAS5	TCGA-LIHC
ENSG00000234772	1.21877	Up	lncRNA	LINC00412	TCGA-LIHC
ENSG00000234779	1.43442	Up	lncRNA	BNC2-AS1	TCGA-LIHC
ENSG00000234793	1.41399	Up	lncRNA		TCGA-LIHC
ENSG00000234869	2.04183	Up	lncRNA		TCGA-LIHC
ENSG00000234899	1.84206	Up	lncRNA	SOX9-AS1	TCGA-LIHC
ENSG00000234902	1.13496	Up	lncRNA		TCGA-LIHC
ENSG00000234912	1.13658	Up	lncRNA	SNHG20	TCGA-LIHC
ENSG00000234945	1.17655	Up	lncRNA	GTF3C2-AS1	TCGA-LIHC
ENSG00000234948	3.86246	Up	lncRNA	LINC01524	TCGA-LIHC
ENSG00000235020	1.45014	Up	lncRNA		TCGA-LIHC
ENSG00000235021	3.16719	Up	lncRNA		TCGA-LIHC
ENSG00000235023	1.86326	Up	lncRNA		TCGA-LIHC
ENSG00000235029	2.97691	Up	lncRNA	MNX1-AS2	TCGA-LIHC
ENSG00000235050	1.12402	Up	lncRNA	MLIP-AS1	TCGA-LIHC
ENSG00000235052	1.33748	Up	lncRNA		TCGA-LIHC
ENSG00000235070	4.14345	Up	lncRNA		TCGA-LIHC
ENSG00000235072	1.23382	Up	lncRNA	ARNILA	TCGA-LIHC
ENSG00000235111	1.26668	Up	lncRNA		TCGA-LIHC
ENSG00000235180	2.56984	Up	lncRNA	LINC00601	TCGA-LIHC
ENSG00000235214	1.60305	Up	lncRNA	FAM83C-AS1	TCGA-LIHC
ENSG00000235237	1.35222	Up	lncRNA		TCGA-LIHC
ENSG00000235263	1.27141	Up	lncRNA		TCGA-LIHC
ENSG00000235277	3.31662	Up	lncRNA		TCGA-LIHC
ENSG00000235295	1.34806	Up	lncRNA	LINC01634	TCGA-LIHC
ENSG00000235304	1.73583	Up	lncRNA	LINC01281	TCGA-LIHC
ENSG00000235319	1.29064	Up	lncRNA		TCGA-LIHC
ENSG00000235335	1.65219	Up	lncRNA	B3GALT1-AS1	TCGA-LIHC
ENSG00000235356	2.65234	Up	lncRNA		TCGA-LIHC
ENSG00000235358	1.08569	Up	lncRNA		TCGA-LIHC
ENSG00000235385	2.81504	Up	lncRNA	LINC02154	TCGA-LIHC
ENSG00000235410	1.60201	Up	lncRNA		TCGA-LIHC
ENSG00000235419	1.88724	Up	lncRNA		TCGA-LIHC
ENSG00000235493	2.61553	Up	lncRNA	LINC01967	TCGA-LIHC
ENSG00000235530	1.73343	Up	lncRNA		TCGA-LIHC
ENSG00000235531	1.18022	Up	lncRNA	MSC-AS1	TCGA-LIHC
ENSG00000235621	2.94561	Up	lncRNA	LINC00494	TCGA-LIHC
ENSG00000235643	1.65073	Up	lncRNA	LINC01647	TCGA-LIHC
ENSG00000235669	1.2202	Up	lncRNA	CHN2-AS1	TCGA-LIHC
ENSG00000235703	1.56391	Up	lncRNA	LINC00894	TCGA-LIHC
ENSG00000235726	1.71103	Up	lncRNA		TCGA-LIHC
ENSG00000235770	2.42756	Up	lncRNA	LINC00607	TCGA-LIHC
ENSG00000235774	3.04628	Up	lncRNA		TCGA-LIHC
ENSG00000235790	1.02259	Up	lncRNA	PEF1-AS1	TCGA-LIHC
ENSG00000235830	2.19056	Up	lncRNA	SRGAP3-AS4	TCGA-LIHC
ENSG00000235831	1.49776	Up	lncRNA	BHLHE40-AS1	TCGA-LIHC
ENSG00000235852	1.26862	Up	lncRNA		TCGA-LIHC
ENSG00000235884	2.56558	Up	lncRNA	LINC00941	TCGA-LIHC
ENSG00000235890	2.16184	Up	lncRNA	TSPEAR-AS1	TCGA-LIHC
ENSG00000235897	1.90254	Up	lncRNA	TM4SF19-AS1	TCGA-LIHC
ENSG00000235939	2.17419	Up	lncRNA		TCGA-LIHC
ENSG00000236013	2.02035	Up	lncRNA		TCGA-LIHC
ENSG00000236017	1.57323	Up	lncRNA	ASMTL-AS1	TCGA-LIHC
ENSG00000236021	1.10956	Up	lncRNA		TCGA-LIHC
ENSG00000236039	1.13944	Up	lncRNA	LINC02889	TCGA-LIHC
ENSG00000236054	2.25438	Up	lncRNA	SYN3-AS1	TCGA-LIHC
ENSG00000236081	2.99774	Up	lncRNA	ELFN1-AS1	TCGA-LIHC
ENSG00000236095	1.48942	Up	lncRNA		TCGA-LIHC
ENSG00000236107	1.47604	Up	lncRNA	SCN1A-AS1	TCGA-LIHC
ENSG00000236140	1.05999	Up	lncRNA		TCGA-LIHC
ENSG00000236144	1.19747	Up	lncRNA	TMEM147-AS1	TCGA-LIHC
ENSG00000236200	1.16058	Up	lncRNA	KDM4A-AS1	TCGA-LIHC
ENSG00000236230	1.50146	Up	lncRNA		TCGA-LIHC
ENSG00000236305	1.74304	Up	lncRNA	SLC12A9-AS1	TCGA-LIHC
ENSG00000236311	2.85701	Up	lncRNA	TLX1NB	TCGA-LIHC
ENSG00000236318	1.20201	Up	lncRNA	LINC02888	TCGA-LIHC
ENSG00000236337	1.15545	Up	lncRNA	FMR1-IT1	TCGA-LIHC
ENSG00000236345	1.41296	Up	lncRNA	SCAT8	TCGA-LIHC
ENSG00000236358	1.53117	Up	lncRNA		TCGA-LIHC
ENSG00000236364	1.09373	Up	lncRNA		TCGA-LIHC
ENSG00000236366	5.03511	Up	lncRNA		TCGA-LIHC
ENSG00000236384	1.58863	Up	lncRNA	LINC00479	TCGA-LIHC
ENSG00000236389	2.1721	Up	lncRNA		TCGA-LIHC
ENSG00000236423	1.23375	Up	lncRNA	LINC01134	TCGA-LIHC
ENSG00000236449	4.74402	Up	lncRNA		TCGA-LIHC
ENSG00000236481	1.37972	Up	lncRNA	LINC02195	TCGA-LIHC
ENSG00000236499	2.14426	Up	lncRNA	LINC00896	TCGA-LIHC
ENSG00000236507	1.5974	Up	lncRNA		TCGA-LIHC
ENSG00000236519	2.22505	Up	lncRNA	LINC01424	TCGA-LIHC
ENSG00000236520	1.73799	Up	lncRNA	GPC6-AS1	TCGA-LIHC
ENSG00000236546	1.25178	Up	lncRNA	MYCL-AS1	TCGA-LIHC
ENSG00000236617	1.34318	Up	lncRNA		TCGA-LIHC
ENSG00000236641	1.13383	Up	lncRNA		TCGA-LIHC
ENSG00000236643	1.42541	Up	lncRNA		TCGA-LIHC
ENSG00000236651	2.80921	Up	lncRNA	DLX2-DT	TCGA-LIHC
ENSG00000236662	1.78784	Up	lncRNA		TCGA-LIHC
ENSG00000236671	2.83346	Up	lncRNA	PRKG1-AS1	TCGA-LIHC
ENSG00000236719	2.74601	Up	lncRNA	OVAAL	TCGA-LIHC
ENSG00000236740	2.13805	Up	lncRNA		TCGA-LIHC
ENSG00000236751	2.84643	Up	lncRNA	LINC01186	TCGA-LIHC
ENSG00000236780	1.72383	Up	lncRNA	LINC01829	TCGA-LIHC
ENSG00000236799	1.30132	Up	lncRNA	LINC02626	TCGA-LIHC
ENSG00000236833	1.67635	Up	lncRNA		TCGA-LIHC
ENSG00000236841	2.10148	Up	lncRNA		TCGA-LIHC
ENSG00000236849	1.20751	Up	lncRNA	LINC01474	TCGA-LIHC
ENSG00000236871	1.43727	Up	lncRNA	LINC00106	TCGA-LIHC
ENSG00000236901	1.40418	Up	lncRNA	MIR600HG	TCGA-LIHC
ENSG00000237015	1.57786	Up	lncRNA		TCGA-LIHC
ENSG00000237017	1.08486	Up	lncRNA		TCGA-LIHC
ENSG00000237080	1.18382	Up	lncRNA	EHMT2-AS1	TCGA-LIHC
ENSG00000237101	1.361	Up	lncRNA		TCGA-LIHC
ENSG00000237133	1.51217	Up	lncRNA	RASGRP3-AS1	TCGA-LIHC
ENSG00000237166	1.83075	Up	lncRNA	LINC01792	TCGA-LIHC
ENSG00000237188	1.08602	Up	lncRNA		TCGA-LIHC
ENSG00000237200	1.24215	Up	lncRNA	ZBTB40-IT1	TCGA-LIHC
ENSG00000237301	1.22486	Up	lncRNA		TCGA-LIHC
ENSG00000237352	1.45324	Up	lncRNA	LINC01358	TCGA-LIHC
ENSG00000237356	1.16643	Up	lncRNA		TCGA-LIHC
ENSG00000237370	1.56209	Up	lncRNA		TCGA-LIHC
ENSG00000237371	1.52308	Up	lncRNA		TCGA-LIHC
ENSG00000237380	4.16742	Up	lncRNA	HOXD-AS2	TCGA-LIHC
ENSG00000237390	3.71597	Up	lncRNA		TCGA-LIHC
ENSG00000237402	1.88016	Up	lncRNA	CAMTA1-IT1	TCGA-LIHC
ENSG00000237422	1.62245	Up	lncRNA		TCGA-LIHC
ENSG00000237424	2.10509	Up	lncRNA	FOXD2-AS1	TCGA-LIHC
ENSG00000237463	2.61061	Up	lncRNA	LRRC52-AS1	TCGA-LIHC
ENSG00000237476	1.36735	Up	lncRNA	LINC01637	TCGA-LIHC
ENSG00000237481	1.70232	Up	lncRNA		TCGA-LIHC
ENSG00000237491	1.21058	Up	lncRNA	LINC01409	TCGA-LIHC
ENSG00000237512	1.85325	Up	lncRNA	UNC5B-AS1	TCGA-LIHC
ENSG00000237520	2.42048	Up	lncRNA		TCGA-LIHC
ENSG00000237590	4.14909	Up	lncRNA		TCGA-LIHC
ENSG00000237596	4.28881	Up	lncRNA		TCGA-LIHC
ENSG00000237637	1.2018	Up	lncRNA	FRY-AS1	TCGA-LIHC
ENSG00000237643	4.12791	Up	lncRNA		TCGA-LIHC
ENSG00000237664	2.3932	Up	lncRNA	LINC00316	TCGA-LIHC
ENSG00000237686	3.757	Up	lncRNA	SCIRT	TCGA-LIHC
ENSG00000237689	2.36407	Up	lncRNA		TCGA-LIHC
ENSG00000237714	1.17279	Up	lncRNA	P4HA2-AS1	TCGA-LIHC
ENSG00000237772	1.06739	Up	lncRNA	LINC02631	TCGA-LIHC
ENSG00000237807	1.1794	Up	lncRNA		TCGA-LIHC
ENSG00000237819	1.68457	Up	lncRNA	CDK6-AS1	TCGA-LIHC
ENSG00000237862	1.94515	Up	lncRNA		TCGA-LIHC
ENSG00000237864	1.54422	Up	lncRNA	LINC00322	TCGA-LIHC
ENSG00000237883	1.14691	Up	lncRNA	DGUOK-AS1	TCGA-LIHC
ENSG00000237886	1.34833	Up	lncRNA	NALT1	TCGA-LIHC
ENSG00000237903	1.58594	Up	lncRNA		TCGA-LIHC
ENSG00000237927	1.57795	Up	lncRNA		TCGA-LIHC
ENSG00000237928	1.37005	Up	lncRNA	NFIA-AS2	TCGA-LIHC
ENSG00000237934	1.21892	Up	lncRNA		TCGA-LIHC
ENSG00000237950	1.4185	Up	lncRNA		TCGA-LIHC
ENSG00000237978	4.73307	Up	lncRNA	KCNMB2-AS1	TCGA-LIHC
ENSG00000238009	2.10093	Up	lncRNA		TCGA-LIHC
ENSG00000238039	1.54713	Up	lncRNA		TCGA-LIHC
ENSG00000238042	2.11256	Up	lncRNA	LINC02257	TCGA-LIHC
ENSG00000238058	1.35423	Up	lncRNA		TCGA-LIHC
ENSG00000238062	2.79503	Up	lncRNA	SPATA3-AS1	TCGA-LIHC
ENSG00000238107	7.30733	Up	lncRNA	LINC02806	TCGA-LIHC
ENSG00000238117	3.78668	Up	lncRNA		TCGA-LIHC
ENSG00000238120	2.26774	Up	lncRNA	LINC01589	TCGA-LIHC
ENSG00000238171	1.35692	Up	lncRNA		TCGA-LIHC
ENSG00000238178	4.24093	Up	lncRNA		TCGA-LIHC
ENSG00000238232	2.72148	Up	lncRNA		TCGA-LIHC
ENSG00000238260	2.16484	Up	lncRNA		TCGA-LIHC
ENSG00000238284	3.9283	Up	lncRNA	LINC01448	TCGA-LIHC
ENSG00000239377	2.55389	Up	lncRNA	ZNF775-AS1	TCGA-LIHC
ENSG00000239415	1.9611	Up	lncRNA		TCGA-LIHC
ENSG00000239523	2.16837	Up	lncRNA	MYLK-AS1	TCGA-LIHC
ENSG00000239589	4.6131	Up	lncRNA	LINC00879	TCGA-LIHC
ENSG00000240086	2.52915	Up	lncRNA		TCGA-LIHC
ENSG00000240219	1.63899	Up	lncRNA		TCGA-LIHC
ENSG00000240241	4.2137	Up	lncRNA		TCGA-LIHC
ENSG00000240350	2.10169	Up	lncRNA	SOCAR	TCGA-LIHC
ENSG00000240405	2.93277	Up	lncRNA	SAMMSON	TCGA-LIHC
ENSG00000240498	3.62675	Up	lncRNA	CDKN2B-AS1	TCGA-LIHC
ENSG00000240499	1.06439	Up	lncRNA		TCGA-LIHC
ENSG00000240541	1.59126	Up	lncRNA	TM4SF1-AS1	TCGA-LIHC
ENSG00000240710	1.32351	Up	lncRNA		TCGA-LIHC
ENSG00000240990	5.12663	Up	lncRNA	HOXA11-AS	TCGA-LIHC
ENSG00000241288	1.00069	Up	lncRNA	LINC02614	TCGA-LIHC
ENSG00000241369	3.2216	Up	lncRNA	LINC01192	TCGA-LIHC
ENSG00000241469	2.66068	Up	lncRNA	LINC00635	TCGA-LIHC
ENSG00000241472	1.73271	Up	lncRNA	PTPRG-AS1	TCGA-LIHC
ENSG00000241475	3.37762	Up	lncRNA		TCGA-LIHC
ENSG00000241520	1.15316	Up	lncRNA		TCGA-LIHC
ENSG00000241544	1.04406	Up	lncRNA	LINC02029	TCGA-LIHC
ENSG00000241769	1.42878	Up	lncRNA	LINC00893	TCGA-LIHC
ENSG00000241884	4.25223	Up	lncRNA		TCGA-LIHC
ENSG00000241990	1.28091	Up	lncRNA	PRR34-AS1	TCGA-LIHC
ENSG00000242021	3.91712	Up	lncRNA		TCGA-LIHC
ENSG00000242078	2.48004	Up	lncRNA		TCGA-LIHC
ENSG00000242125	1.67711	Up	lncRNA	SNHG3	TCGA-LIHC
ENSG00000242268	3.67283	Up	lncRNA	LINC02082	TCGA-LIHC
ENSG00000242428	2.73475	Up	lncRNA	CFAP20DC-AS1	TCGA-LIHC
ENSG00000242440	3.06209	Up	lncRNA	LINC02046	TCGA-LIHC
ENSG00000242553	1.82471	Up	lncRNA		TCGA-LIHC
ENSG00000242578	1.03558	Up	lncRNA		TCGA-LIHC
ENSG00000242622	1.25568	Up	lncRNA		TCGA-LIHC
ENSG00000242781	2.97765	Up	lncRNA	LINC02050	TCGA-LIHC
ENSG00000242798	2.30349	Up	lncRNA		TCGA-LIHC
ENSG00000242828	3.27132	Up	lncRNA		TCGA-LIHC
ENSG00000242861	1.17439	Up	lncRNA		TCGA-LIHC
ENSG00000243144	3.2474	Up	lncRNA		TCGA-LIHC
ENSG00000243155	2.35972	Up	lncRNA		TCGA-LIHC
ENSG00000243224	2.02443	Up	lncRNA		TCGA-LIHC
ENSG00000243230	2.54018	Up	lncRNA		TCGA-LIHC
ENSG00000243368	1.44068	Up	lncRNA	MCCC1-AS1	TCGA-LIHC
ENSG00000243433	1.90185	Up	lncRNA		TCGA-LIHC
ENSG00000243479	7.10422	Up	lncRNA	MNX1-AS1	TCGA-LIHC
ENSG00000243620	4.94111	Up	lncRNA		TCGA-LIHC
ENSG00000243629	1.91015	Up	lncRNA	LINC00880	TCGA-LIHC
ENSG00000243766	7.30718	Up	lncRNA	HOTTIP	TCGA-LIHC
ENSG00000243810	3.48768	Up	lncRNA	CFAP61-AS1	TCGA-LIHC
ENSG00000243885	1.80556	Up	lncRNA		TCGA-LIHC
ENSG00000243902	3.26176	Up	lncRNA	ELFN2	TCGA-LIHC
ENSG00000243944	5.15959	Up	lncRNA		TCGA-LIHC
ENSG00000243961	3.0569	Up	lncRNA	PARAL1	TCGA-LIHC
ENSG00000244040	1.67382	Up	lncRNA	IL12A-AS1	TCGA-LIHC
ENSG00000244041	1.06502	Up	lncRNA	LINC01011	TCGA-LIHC
ENSG00000244137	1.99722	Up	lncRNA		TCGA-LIHC
ENSG00000244151	1.81968	Up	lncRNA		TCGA-LIHC
ENSG00000244184	1.13465	Up	lncRNA		TCGA-LIHC
ENSG00000244300	1.58033	Up	lncRNA	GATA2-AS1	TCGA-LIHC
ENSG00000244349	1.01642	Up	lncRNA		TCGA-LIHC
ENSG00000244502	1.76573	Up	lncRNA	HDAC11-AS1	TCGA-LIHC
ENSG00000244586	1.00975	Up	lncRNA	WNT5A-AS1	TCGA-LIHC
ENSG00000244675	1.0315	Up	lncRNA		TCGA-LIHC
ENSG00000244998	2.50576	Up	lncRNA		TCGA-LIHC
ENSG00000245080	2.193	Up	lncRNA	MIR3150BHG	TCGA-LIHC
ENSG00000245149	1.47228	Up	lncRNA	RNF139-AS1	TCGA-LIHC
ENSG00000245248	1.25797	Up	lncRNA	USP2-AS1	TCGA-LIHC
ENSG00000245322	1.28621	Up	lncRNA	H2AZ1-DT	TCGA-LIHC
ENSG00000245330	1.14099	Up	lncRNA		TCGA-LIHC
ENSG00000245466	2.26858	Up	lncRNA		TCGA-LIHC
ENSG00000245479	1.22451	Up	lncRNA	LINC01585	TCGA-LIHC
ENSG00000245522	1.46849	Up	lncRNA	LINC02709	TCGA-LIHC
ENSG00000245614	2.8307	Up	lncRNA	DDX11-AS1	TCGA-LIHC
ENSG00000245662	2.52545	Up	lncRNA	LINC02211	TCGA-LIHC
ENSG00000245667	1.49291	Up	lncRNA		TCGA-LIHC
ENSG00000245688	1.63687	Up	lncRNA		TCGA-LIHC
ENSG00000245694	3.33246	Up	lncRNA	CRNDE	TCGA-LIHC
ENSG00000245719	2.46245	Up	lncRNA		TCGA-LIHC
ENSG00000245812	2.60301	Up	lncRNA	LINC02202	TCGA-LIHC
ENSG00000245832	2.33772	Up	lncRNA	MIR4300HG	TCGA-LIHC
ENSG00000245904	1.08655	Up	lncRNA		TCGA-LIHC
ENSG00000245910	1.38189	Up	lncRNA	SNHG6	TCGA-LIHC
ENSG00000245970	1.43416	Up	lncRNA		TCGA-LIHC
ENSG00000246095	2.58866	Up	lncRNA	LINC01096	TCGA-LIHC
ENSG00000246130	1.07413	Up	lncRNA		TCGA-LIHC
ENSG00000246228	3.00169	Up	lncRNA	CASC8	TCGA-LIHC
ENSG00000246323	1.35644	Up	lncRNA		TCGA-LIHC
ENSG00000246334	2.82205	Up	lncRNA	PRR7-AS1	TCGA-LIHC
ENSG00000246339	1.23187	Up	lncRNA	EXTL3-AS1	TCGA-LIHC
ENSG00000246350	1.95544	Up	lncRNA		TCGA-LIHC
ENSG00000246465	1.93495	Up	lncRNA		TCGA-LIHC
ENSG00000246528	1.97608	Up	lncRNA		TCGA-LIHC
ENSG00000246662	1.68071	Up	lncRNA	LINC00535	TCGA-LIHC
ENSG00000246792	1.97002	Up	lncRNA		TCGA-LIHC
ENSG00000246876	4.25046	Up	lncRNA	LINC02466	TCGA-LIHC
ENSG00000246877	1.95471	Up	lncRNA	DNM1P35	TCGA-LIHC
ENSG00000246982	1.33919	Up	lncRNA		TCGA-LIHC
ENSG00000247081	1.63131	Up	lncRNA	BAALC-AS1	TCGA-LIHC
ENSG00000247092	1.05947	Up	lncRNA	SNHG10	TCGA-LIHC
ENSG00000247151	1.21546	Up	lncRNA	CSTF3-DT	TCGA-LIHC
ENSG00000247311	2.27145	Up	lncRNA		TCGA-LIHC
ENSG00000247324	1.30258	Up	lncRNA		TCGA-LIHC
ENSG00000247345	2.54954	Up	lncRNA		TCGA-LIHC
ENSG00000247373	1.33051	Up	lncRNA	TMED2-DT	TCGA-LIHC
ENSG00000247381	1.87631	Up	lncRNA	PLUT	TCGA-LIHC
ENSG00000247675	2.1935	Up	lncRNA	LRP4-AS1	TCGA-LIHC
ENSG00000248015	1.39277	Up	lncRNA		TCGA-LIHC
ENSG00000248103	2.85183	Up	lncRNA		TCGA-LIHC
ENSG00000248118	7.4661	Up	lncRNA	LINC01019	TCGA-LIHC
ENSG00000248131	6.41414	Up	lncRNA	LINC01194	TCGA-LIHC
ENSG00000248138	3.54651	Up	lncRNA		TCGA-LIHC
ENSG00000248187	2.37796	Up	lncRNA		TCGA-LIHC
ENSG00000248211	3.11693	Up	lncRNA	TRPC7-AS1	TCGA-LIHC
ENSG00000248215	2.99154	Up	lncRNA	LINC02505	TCGA-LIHC
ENSG00000248238	3.46131	Up	lncRNA	LINC02438	TCGA-LIHC
ENSG00000248265	2.93377	Up	lncRNA	FLJ12825	TCGA-LIHC
ENSG00000248307	2.40235	Up	lncRNA	LINC00616	TCGA-LIHC
ENSG00000248318	1.12591	Up	lncRNA		TCGA-LIHC
ENSG00000248323	4.11504	Up	lncRNA	LUCAT1	TCGA-LIHC
ENSG00000248360	1.16337	Up	lncRNA	LINC00504	TCGA-LIHC
ENSG00000248362	2.38787	Up	lncRNA		TCGA-LIHC
ENSG00000248363	4.64044	Up	lncRNA		TCGA-LIHC
ENSG00000248367	1.77964	Up	lncRNA		TCGA-LIHC
ENSG00000248370	2.49467	Up	lncRNA	LINC02434	TCGA-LIHC
ENSG00000248431	5.75737	Up	lncRNA		TCGA-LIHC
ENSG00000248461	4.63302	Up	lncRNA	LINC02119	TCGA-LIHC
ENSG00000248510	4.49605	Up	lncRNA	LINC02267	TCGA-LIHC
ENSG00000248515	5.11732	Up	lncRNA		TCGA-LIHC
ENSG00000248528	3.4401	Up	lncRNA	LINC02058	TCGA-LIHC
ENSG00000248538	1.06348	Up	lncRNA		TCGA-LIHC
ENSG00000248540	3.17679	Up	lncRNA		TCGA-LIHC
ENSG00000248544	1.00899	Up	lncRNA		TCGA-LIHC
ENSG00000248587	2.53687	Up	lncRNA	GDNF-AS1	TCGA-LIHC
ENSG00000248596	2.094	Up	lncRNA		TCGA-LIHC
ENSG00000248668	1.43142	Up	lncRNA	OXCT1-AS1	TCGA-LIHC
ENSG00000248677	1.18429	Up	lncRNA	LINC02102	TCGA-LIHC
ENSG00000248693	1.03013	Up	lncRNA	LINC02100	TCGA-LIHC
ENSG00000248727	1.74791	Up	lncRNA	LINC01948	TCGA-LIHC
ENSG00000248783	4.51531	Up	lncRNA		TCGA-LIHC
ENSG00000248837	3.51474	Up	lncRNA		TCGA-LIHC
ENSG00000248927	1.3949	Up	lncRNA		TCGA-LIHC
ENSG00000248968	1.77618	Up	lncRNA		TCGA-LIHC
ENSG00000248975	2.51365	Up	lncRNA		TCGA-LIHC
ENSG00000249001	5.379	Up	lncRNA		TCGA-LIHC
ENSG00000249069	1.83526	Up	lncRNA	LINC01033	TCGA-LIHC
ENSG00000249111	2.85036	Up	lncRNA		TCGA-LIHC
ENSG00000249125	2.13543	Up	lncRNA		TCGA-LIHC
ENSG00000249196	5.03909	Up	lncRNA	TMEM132D-AS1	TCGA-LIHC
ENSG00000249231	1.81853	Up	lncRNA	CASC16	TCGA-LIHC
ENSG00000249236	2.1921	Up	lncRNA		TCGA-LIHC
ENSG00000249295	1.60747	Up	lncRNA		TCGA-LIHC
ENSG00000249307	1.61851	Up	lncRNA	LINC01088	TCGA-LIHC
ENSG00000249328	1.76004	Up	lncRNA		TCGA-LIHC
ENSG00000249375	1.34388	Up	lncRNA	CASC11	TCGA-LIHC
ENSG00000249378	2.83625	Up	lncRNA	LINC01060	TCGA-LIHC
ENSG00000249379	1.04934	Up	lncRNA		TCGA-LIHC
ENSG00000249395	3.30013	Up	lncRNA	CASC9	TCGA-LIHC
ENSG00000249396	2.93653	Up	lncRNA	LINC02212	TCGA-LIHC
ENSG00000249413	5.08346	Up	lncRNA		TCGA-LIHC
ENSG00000249425	2.65282	Up	lncRNA	LINC02477	TCGA-LIHC
ENSG00000249426	1.24274	Up	lncRNA		TCGA-LIHC
ENSG00000249453	1.18387	Up	lncRNA		TCGA-LIHC
ENSG00000249463	2.3504	Up	lncRNA		TCGA-LIHC
ENSG00000249464	1.90668	Up	lncRNA	LINC01091	TCGA-LIHC
ENSG00000249526	1.31723	Up	lncRNA		TCGA-LIHC
ENSG00000249550	5.79718	Up	lncRNA	LINC01234	TCGA-LIHC
ENSG00000249574	2.31954	Up	lncRNA		TCGA-LIHC
ENSG00000249628	6.15428	Up	lncRNA	LINC00942	TCGA-LIHC
ENSG00000249631	1.81222	Up	lncRNA		TCGA-LIHC
ENSG00000249635	1.10522	Up	lncRNA		TCGA-LIHC
ENSG00000249639	2.05185	Up	lncRNA		TCGA-LIHC
ENSG00000249650	1.57409	Up	lncRNA		TCGA-LIHC
ENSG00000249655	1.25684	Up	lncRNA		TCGA-LIHC
ENSG00000249679	1.10751	Up	lncRNA		TCGA-LIHC
ENSG00000249736	2.24004	Up	lncRNA	LINC02242	TCGA-LIHC
ENSG00000249790	3.10368	Up	lncRNA		TCGA-LIHC
ENSG00000249803	5.48646	Up	lncRNA		TCGA-LIHC
ENSG00000249825	1.79471	Up	lncRNA	THBS4-AS1	TCGA-LIHC
ENSG00000249849	1.31983	Up	lncRNA		TCGA-LIHC
ENSG00000249856	1.61402	Up	lncRNA		TCGA-LIHC
ENSG00000249859	2.35392	Up	lncRNA	PVT1	TCGA-LIHC
ENSG00000249894	2.98668	Up	lncRNA		TCGA-LIHC
ENSG00000249916	1.97063	Up	lncRNA		TCGA-LIHC
ENSG00000250033	3.73163	Up	lncRNA	SLC7A11-AS1	TCGA-LIHC
ENSG00000250038	5.5143	Up	lncRNA		TCGA-LIHC
ENSG00000250049	4.35643	Up	lncRNA		TCGA-LIHC
ENSG00000250060	4.92093	Up	lncRNA		TCGA-LIHC
ENSG00000250073	1.14071	Up	lncRNA		TCGA-LIHC
ENSG00000250081	2.89239	Up	lncRNA		TCGA-LIHC
ENSG00000250091	1.06044	Up	lncRNA	DNAH10OS	TCGA-LIHC
ENSG00000250102	5.72501	Up	lncRNA	LINC02377	TCGA-LIHC
ENSG00000250122	2.47509	Up	lncRNA		TCGA-LIHC
ENSG00000250133	3.9291	Up	lncRNA	HOXC-AS2	TCGA-LIHC
ENSG00000250208	1.54938	Up	lncRNA	FZD10-AS1	TCGA-LIHC
ENSG00000250244	2.5896	Up	lncRNA		TCGA-LIHC
ENSG00000250284	3.09925	Up	lncRNA		TCGA-LIHC
ENSG00000250286	3.02188	Up	lncRNA		TCGA-LIHC
ENSG00000250295	1.0844	Up	lncRNA	RDH10-AS1	TCGA-LIHC
ENSG00000250320	2.94331	Up	lncRNA	EDIL3-DT	TCGA-LIHC
ENSG00000250337	2.39029	Up	lncRNA	PURPL	TCGA-LIHC
ENSG00000250348	3.05829	Up	lncRNA		TCGA-LIHC
ENSG00000250358	4.3005	Up	lncRNA	LINC02200	TCGA-LIHC
ENSG00000250397	1.60927	Up	lncRNA		TCGA-LIHC
ENSG00000250421	1.54004	Up	lncRNA		TCGA-LIHC
ENSG00000250432	2.16544	Up	lncRNA	FAM242C	TCGA-LIHC
ENSG00000250451	4.32069	Up	lncRNA	HOXC-AS1	TCGA-LIHC
ENSG00000250453	2.02374	Up	lncRNA		TCGA-LIHC
ENSG00000250493	3.15659	Up	lncRNA		TCGA-LIHC
ENSG00000250508	1.37805	Up	lncRNA	LINC02701	TCGA-LIHC
ENSG00000250509	4.02971	Up	lncRNA		TCGA-LIHC
ENSG00000250514	2.41272	Up	lncRNA	LINC02125	TCGA-LIHC
ENSG00000250546	2.6592	Up	lncRNA		TCGA-LIHC
ENSG00000250548	1.59249	Up	lncRNA	LINC01303	TCGA-LIHC
ENSG00000250579	5.45249	Up	lncRNA	CTD-2297D10.2	TCGA-LIHC
ENSG00000250584	3.07962	Up	lncRNA	LINC01511	TCGA-LIHC
ENSG00000250590	4.57439	Up	lncRNA	LINC02492	TCGA-LIHC
ENSG00000250634	1.26136	Up	lncRNA	LINC01182	TCGA-LIHC
ENSG00000250682	4.69933	Up	lncRNA	LINC00491	TCGA-LIHC
ENSG00000250696	2.46336	Up	lncRNA		TCGA-LIHC
ENSG00000250708	3.30182	Up	lncRNA	LINC02269	TCGA-LIHC
ENSG00000250740	1.65785	Up	lncRNA		TCGA-LIHC
ENSG00000250742	1.15471	Up	lncRNA	LINC02381	TCGA-LIHC
ENSG00000250775	2.17217	Up	lncRNA		TCGA-LIHC
ENSG00000250820	2.1612	Up	lncRNA		TCGA-LIHC
ENSG00000250829	2.4128	Up	lncRNA		TCGA-LIHC
ENSG00000250838	3.05844	Up	lncRNA		TCGA-LIHC
ENSG00000250863	2.29941	Up	lncRNA		TCGA-LIHC
ENSG00000250874	4.69506	Up	lncRNA		TCGA-LIHC
ENSG00000250891	1.92283	Up	lncRNA	LINC02208	TCGA-LIHC
ENSG00000250900	1.0988	Up	lncRNA	TRIM7-AS1	TCGA-LIHC
ENSG00000250934	1.07322	Up	lncRNA		TCGA-LIHC
ENSG00000250986	2.60918	Up	lncRNA	LINC02600	TCGA-LIHC
ENSG00000250988	1.00056	Up	lncRNA	SNHG21	TCGA-LIHC
ENSG00000251003	4.0858	Up	lncRNA	ZFPM2-AS1	TCGA-LIHC
ENSG00000251026	6.5751	Up	lncRNA	LINC02163	TCGA-LIHC
ENSG00000251095	3.45171	Up	lncRNA		TCGA-LIHC
ENSG00000251129	3.24076	Up	lncRNA	LINC02506	TCGA-LIHC
ENSG00000251131	1.89037	Up	lncRNA		TCGA-LIHC
ENSG00000251138	7.91194	Up	lncRNA	LINC02882	TCGA-LIHC
ENSG00000251141	1.1162	Up	lncRNA	MRPS30-DT	TCGA-LIHC
ENSG00000251161	1.162	Up	lncRNA		TCGA-LIHC
ENSG00000251169	1.15696	Up	lncRNA	LINC01843	TCGA-LIHC
ENSG00000251199	4.31171	Up	lncRNA		TCGA-LIHC
ENSG00000251209	1.53632	Up	lncRNA	LINC00923	TCGA-LIHC
ENSG00000251257	2.45452	Up	lncRNA		TCGA-LIHC
ENSG00000251273	3.02297	Up	lncRNA	LINC02228	TCGA-LIHC
ENSG00000251292	1.89227	Up	lncRNA	ERVH-1	TCGA-LIHC
ENSG00000251301	2.15691	Up	lncRNA	LINC02384	TCGA-LIHC
ENSG00000251320	2.21273	Up	lncRNA		TCGA-LIHC
ENSG00000251350	6.39089	Up	lncRNA	LINC02475	TCGA-LIHC
ENSG00000251361	2.94834	Up	lncRNA		TCGA-LIHC
ENSG00000251363	2.37266	Up	lncRNA	LINC02315	TCGA-LIHC
ENSG00000251381	3.17675	Up	lncRNA	LINC00958	TCGA-LIHC
ENSG00000251388	2.32549	Up	lncRNA		TCGA-LIHC
ENSG00000251396	1.1499	Up	lncRNA	LINC01301	TCGA-LIHC
ENSG00000251432	1.16122	Up	lncRNA	LINC02615	TCGA-LIHC
ENSG00000251450	2.65344	Up	lncRNA	RASGRF2-AS1	TCGA-LIHC
ENSG00000251461	3.61657	Up	lncRNA		TCGA-LIHC
ENSG00000251517	1.88776	Up	lncRNA		TCGA-LIHC
ENSG00000251574	4.3292	Up	lncRNA		TCGA-LIHC
ENSG00000251576	2.10448	Up	lncRNA	LINC01267	TCGA-LIHC
ENSG00000251598	2.1884	Up	lncRNA		TCGA-LIHC
ENSG00000251602	1.12622	Up	lncRNA		TCGA-LIHC
ENSG00000251629	8.1944	Up	lncRNA	LINC02241	TCGA-LIHC
ENSG00000251676	4.08835	Up	lncRNA	SNHG27	TCGA-LIHC
ENSG00000252690	1.12049	Up	lncRNA		TCGA-LIHC
ENSG00000253105	1.19578	Up	lncRNA		TCGA-LIHC
ENSG00000253121	1.19408	Up	lncRNA		TCGA-LIHC
ENSG00000253123	1.98715	Up	lncRNA		TCGA-LIHC
ENSG00000253138	1.50024	Up	lncRNA	LINC00967	TCGA-LIHC
ENSG00000253161	2.2726	Up	lncRNA	LINC01605	TCGA-LIHC
ENSG00000253163	1.12549	Up	lncRNA		TCGA-LIHC
ENSG00000253194	1.2472	Up	lncRNA		TCGA-LIHC
ENSG00000253210	1.92132	Up	lncRNA		TCGA-LIHC
ENSG00000253214	1.3692	Up	lncRNA		TCGA-LIHC
ENSG00000253227	4.5783	Up	lncRNA		TCGA-LIHC
ENSG00000253302	2.50257	Up	lncRNA	STAU2-AS1	TCGA-LIHC
ENSG00000253307	2.27557	Up	lncRNA		TCGA-LIHC
ENSG00000253308	2.23544	Up	lncRNA		TCGA-LIHC
ENSG00000253317	1.62878	Up	lncRNA		TCGA-LIHC
ENSG00000253339	1.93399	Up	lncRNA		TCGA-LIHC
ENSG00000253347	1.44972	Up	lncRNA		TCGA-LIHC
ENSG00000253348	1.15617	Up	lncRNA		TCGA-LIHC
ENSG00000253363	5.6852	Up	lncRNA		TCGA-LIHC
ENSG00000253395	4.00525	Up	lncRNA		TCGA-LIHC
ENSG00000253414	2.25763	Up	lncRNA	LINC01605	TCGA-LIHC
ENSG00000253417	4.39282	Up	lncRNA	LINC02159	TCGA-LIHC
ENSG00000253484	3.95351	Up	lncRNA		TCGA-LIHC
ENSG00000253490	1.73388	Up	lncRNA	LINC02099	TCGA-LIHC
ENSG00000253508	5.72077	Up	lncRNA		TCGA-LIHC
ENSG00000253513	1.41025	Up	lncRNA		TCGA-LIHC
ENSG00000253552	1.39628	Up	lncRNA	HOXA-AS2	TCGA-LIHC
ENSG00000253553	2.88598	Up	lncRNA		TCGA-LIHC
ENSG00000253584	4.80131	Up	lncRNA		TCGA-LIHC
ENSG00000253603	1.50107	Up	lncRNA	CERNA3	TCGA-LIHC
ENSG00000253616	2.18909	Up	lncRNA		TCGA-LIHC
ENSG00000253633	1.85722	Up	lncRNA		TCGA-LIHC
ENSG00000253636	1.11197	Up	lncRNA		TCGA-LIHC
ENSG00000253642	6.08441	Up	lncRNA		TCGA-LIHC
ENSG00000253666	1.04048	Up	lncRNA		TCGA-LIHC
ENSG00000253671	1.33365	Up	lncRNA		TCGA-LIHC
ENSG00000253706	5.63159	Up	lncRNA		TCGA-LIHC
ENSG00000253716	1.55133	Up	lncRNA	MINCR	TCGA-LIHC
ENSG00000253741	1.6185	Up	lncRNA	LNCOC1	TCGA-LIHC
ENSG00000253773	1.34079	Up	lncRNA	C8orf37-AS1	TCGA-LIHC
ENSG00000253787	1.66443	Up	lncRNA	LINC02219	TCGA-LIHC
ENSG00000253796	1.52016	Up	lncRNA		TCGA-LIHC
ENSG00000253807	1.85035	Up	lncRNA	LINC01170	TCGA-LIHC
ENSG00000253819	2.24641	Up	lncRNA	LINC01151	TCGA-LIHC
ENSG00000253824	1.48988	Up	lncRNA		TCGA-LIHC
ENSG00000253844	1.2482	Up	lncRNA		TCGA-LIHC
ENSG00000253868	2.95713	Up	lncRNA	FER1L6-AS2	TCGA-LIHC
ENSG00000253877	6.43826	Up	lncRNA	LINC01608	TCGA-LIHC
ENSG00000253898	11.3715	Up	lncRNA	LINC01419	TCGA-LIHC
ENSG00000253931	5.73888	Up	lncRNA		TCGA-LIHC
ENSG00000253948	1.04038	Up	lncRNA	VPS13B-DT	TCGA-LIHC
ENSG00000253978	1.84475	Up	lncRNA	CTB-178M22.2	TCGA-LIHC
ENSG00000253983	2.27595	Up	lncRNA		TCGA-LIHC
ENSG00000254027	1.79449	Up	lncRNA		TCGA-LIHC
ENSG00000254054	1.73825	Up	lncRNA		TCGA-LIHC
ENSG00000254099	1.10458	Up	lncRNA		TCGA-LIHC
ENSG00000254101	3.39054	Up	lncRNA	LINC02055	TCGA-LIHC
ENSG00000254208	1.47856	Up	lncRNA		TCGA-LIHC
ENSG00000254224	1.16843	Up	lncRNA		TCGA-LIHC
ENSG00000254226	1.90255	Up	lncRNA	LINC01933	TCGA-LIHC
ENSG00000254233	4.56832	Up	lncRNA	LINC02365	TCGA-LIHC
ENSG00000254251	2.12423	Up	lncRNA		TCGA-LIHC
ENSG00000254266	2.81242	Up	lncRNA	PKIA-AS1	TCGA-LIHC
ENSG00000254275	1.07597	Up	lncRNA	LINC00824	TCGA-LIHC
ENSG00000254290	3.0705	Up	lncRNA		TCGA-LIHC
ENSG00000254333	1.70803	Up	lncRNA	NDST1-AS1	TCGA-LIHC
ENSG00000254338	5.76401	Up	lncRNA	MAFA-AS1	TCGA-LIHC
ENSG00000254349	4.52811	Up	lncRNA	MIR2052HG	TCGA-LIHC
ENSG00000254363	1.10485	Up	lncRNA		TCGA-LIHC
ENSG00000254364	1.51498	Up	lncRNA		TCGA-LIHC
ENSG00000254369	3.63076	Up	lncRNA	HOXA-AS3	TCGA-LIHC
ENSG00000254389	1.4865	Up	lncRNA	RHPN1-AS1	TCGA-LIHC
ENSG00000254416	1.60705	Up	lncRNA	LINC02732	TCGA-LIHC
ENSG00000254419	1.21584	Up	lncRNA		TCGA-LIHC
ENSG00000254420	1.23823	Up	lncRNA		TCGA-LIHC
ENSG00000254461	1.46296	Up	lncRNA		TCGA-LIHC
ENSG00000254542	1.78761	Up	lncRNA	NAV2-AS3	TCGA-LIHC
ENSG00000254548	1.73301	Up	lncRNA		TCGA-LIHC
ENSG00000254560	4.74602	Up	lncRNA	BBOX1-AS1	TCGA-LIHC
ENSG00000254632	1.64663	Up	lncRNA		TCGA-LIHC
ENSG00000254654	3.34386	Up	lncRNA	LINC02685	TCGA-LIHC
ENSG00000254734	3.29144	Up	lncRNA		TCGA-LIHC
ENSG00000254740	1.36874	Up	lncRNA		TCGA-LIHC
ENSG00000254768	1.68541	Up	lncRNA		TCGA-LIHC
ENSG00000254812	1.42874	Up	lncRNA		TCGA-LIHC
ENSG00000254815	1.1685	Up	lncRNA	LMNTD2-AS1	TCGA-LIHC
ENSG00000254842	1.14433	Up	lncRNA	LINC02551	TCGA-LIHC
ENSG00000254844	2.38845	Up	lncRNA		TCGA-LIHC
ENSG00000254854	2.22227	Up	lncRNA		TCGA-LIHC
ENSG00000254874	3.62419	Up	lncRNA		TCGA-LIHC
ENSG00000254973	2.0833	Up	lncRNA		TCGA-LIHC
ENSG00000255007	2.91725	Up	lncRNA	LINC02489	TCGA-LIHC
ENSG00000255026	1.25925	Up	lncRNA		TCGA-LIHC
ENSG00000255031	1.60984	Up	lncRNA		TCGA-LIHC
ENSG00000255050	1.46708	Up	lncRNA		TCGA-LIHC
ENSG00000255100	1.08114	Up	lncRNA		TCGA-LIHC
ENSG00000255120	1.67059	Up	lncRNA	OVOL1-AS1	TCGA-LIHC
ENSG00000255135	1.11199	Up	lncRNA		TCGA-LIHC
ENSG00000255142	2.03217	Up	lncRNA		TCGA-LIHC
ENSG00000255158	1.35979	Up	lncRNA		TCGA-LIHC
ENSG00000255224	2.08541	Up	lncRNA		TCGA-LIHC
ENSG00000255306	1.47621	Up	lncRNA		TCGA-LIHC
ENSG00000255325	2.90903	Up	lncRNA		TCGA-LIHC
ENSG00000255337	1.20653	Up	lncRNA		TCGA-LIHC
ENSG00000255343	1.34718	Up	lncRNA		TCGA-LIHC
ENSG00000255364	1.93235	Up	lncRNA	SMILR	TCGA-LIHC
ENSG00000255375	2.07606	Up	lncRNA		TCGA-LIHC
ENSG00000255395	1.58229	Up	lncRNA		TCGA-LIHC
ENSG00000255441	1.16476	Up	lncRNA	SIGLEC10-AS1	TCGA-LIHC
ENSG00000255446	2.05074	Up	lncRNA		TCGA-LIHC
ENSG00000255449	1.07635	Up	lncRNA		TCGA-LIHC
ENSG00000255503	1.55441	Up	lncRNA		TCGA-LIHC
ENSG00000255521	2.35575	Up	lncRNA		TCGA-LIHC
ENSG00000255559	2.15264	Up	lncRNA	ZNF252P-AS1	TCGA-LIHC
ENSG00000255571	1.91418	Up	lncRNA	MIR9-3HG	TCGA-LIHC
ENSG00000255599	2.45184	Up	lncRNA		TCGA-LIHC
ENSG00000255689	2.09611	Up	lncRNA		TCGA-LIHC
ENSG00000255693	1.85636	Up	lncRNA	LINC02389	TCGA-LIHC
ENSG00000255717	1.5811	Up	lncRNA	SNHG1	TCGA-LIHC
ENSG00000255741	1.23636	Up	lncRNA		TCGA-LIHC
ENSG00000255746	2.37316	Up	lncRNA		TCGA-LIHC
ENSG00000255772	1.79943	Up	lncRNA	LINC01479	TCGA-LIHC
ENSG00000255794	3.74077	Up	lncRNA	RMST	TCGA-LIHC
ENSG00000255843	4.17989	Up	lncRNA		TCGA-LIHC
ENSG00000255847	1.48211	Up	lncRNA		TCGA-LIHC
ENSG00000255874	1.78034	Up	lncRNA	PRECSIT	TCGA-LIHC
ENSG00000255910	1.57647	Up	lncRNA		TCGA-LIHC
ENSG00000255966	1.62346	Up	lncRNA		TCGA-LIHC
ENSG00000255970	2.05418	Up	lncRNA	LINC02421	TCGA-LIHC
ENSG00000255983	2.83616	Up	lncRNA		TCGA-LIHC
ENSG00000255992	1.31688	Up	lncRNA		TCGA-LIHC
ENSG00000256007	1.99587	Up	lncRNA	ARAP1-AS1	TCGA-LIHC
ENSG00000256020	1.87579	Up	lncRNA		TCGA-LIHC
ENSG00000256028	1.42716	Up	lncRNA		TCGA-LIHC
ENSG00000256084	1.47568	Up	lncRNA		TCGA-LIHC
ENSG00000256124	1.49265	Up	lncRNA	LINC01152	TCGA-LIHC
ENSG00000256128	2.84057	Up	lncRNA	LINC00944	TCGA-LIHC
ENSG00000256151	4.86696	Up	lncRNA	ADGRD1-AS1	TCGA-LIHC
ENSG00000256278	1.10359	Up	lncRNA		TCGA-LIHC
ENSG00000256287	1.71352	Up	lncRNA	LINC02398	TCGA-LIHC
ENSG00000256312	2.03319	Up	lncRNA		TCGA-LIHC
ENSG00000256417	3.63526	Up	lncRNA		TCGA-LIHC
ENSG00000256443	2.0422	Up	lncRNA		TCGA-LIHC
ENSG00000256564	1.20461	Up	lncRNA		TCGA-LIHC
ENSG00000256690	1.14456	Up	lncRNA		TCGA-LIHC
ENSG00000256732	4.44993	Up	lncRNA		TCGA-LIHC
ENSG00000256811	1.16467	Up	lncRNA		TCGA-LIHC
ENSG00000256824	1.25119	Up	lncRNA		TCGA-LIHC
ENSG00000256894	1.178	Up	lncRNA		TCGA-LIHC
ENSG00000256897	1.11532	Up	lncRNA		TCGA-LIHC
ENSG00000256940	1.44	Up	lncRNA	PPP1R14B-AS1	TCGA-LIHC
ENSG00000256955	1.24283	Up	lncRNA		TCGA-LIHC
ENSG00000257058	1.35558	Up	lncRNA		TCGA-LIHC
ENSG00000257069	1.75307	Up	lncRNA	KCNK4-TEX40	TCGA-LIHC
ENSG00000257086	1.31629	Up	lncRNA		TCGA-LIHC
ENSG00000257167	1.62756	Up	lncRNA	TMPO-AS1	TCGA-LIHC
ENSG00000257185	3.19333	Up	lncRNA	LINC02293	TCGA-LIHC
ENSG00000257191	2.44176	Up	lncRNA		TCGA-LIHC
ENSG00000257219	1.60509	Up	lncRNA	LNCOG	TCGA-LIHC
ENSG00000257222	1.57797	Up	lncRNA		TCGA-LIHC
ENSG00000257345	3.95167	Up	lncRNA	LINC02413	TCGA-LIHC
ENSG00000257354	1.07388	Up	lncRNA		TCGA-LIHC
ENSG00000257543	1.69393	Up	lncRNA		TCGA-LIHC
ENSG00000257556	1.80096	Up	lncRNA	LINC02298	TCGA-LIHC
ENSG00000257588	2.0975	Up	lncRNA		TCGA-LIHC
ENSG00000257596	2.09007	Up	lncRNA	SCAT2	TCGA-LIHC
ENSG00000257605	1.1922	Up	lncRNA	MYG1-AS1	TCGA-LIHC
ENSG00000257636	4.91627	Up	lncRNA	G2E3-AS1	TCGA-LIHC
ENSG00000257642	1.90595	Up	lncRNA	KCCAT198	TCGA-LIHC
ENSG00000257654	3.21333	Up	lncRNA		TCGA-LIHC
ENSG00000257681	1.2116	Up	lncRNA		TCGA-LIHC
ENSG00000257698	1.64845	Up	lncRNA	GIHCG	TCGA-LIHC
ENSG00000257732	2.92161	Up	lncRNA		TCGA-LIHC
ENSG00000257750	2.09368	Up	lncRNA	LINC02445	TCGA-LIHC
ENSG00000257761	2.15693	Up	lncRNA		TCGA-LIHC
ENSG00000257766	2.39588	Up	lncRNA		TCGA-LIHC
ENSG00000257809	1.91095	Up	lncRNA		TCGA-LIHC
ENSG00000257842	5.45296	Up	lncRNA	LINC02588	TCGA-LIHC
ENSG00000257869	4.96091	Up	lncRNA		TCGA-LIHC
ENSG00000257883	2.71031	Up	lncRNA		TCGA-LIHC
ENSG00000257893	7.22392	Up	lncRNA	LINC02404	TCGA-LIHC
ENSG00000257894	1.0846	Up	lncRNA		TCGA-LIHC
ENSG00000257913	1.9325	Up	lncRNA	DDN-AS1	TCGA-LIHC
ENSG00000257918	1.19272	Up	lncRNA		TCGA-LIHC
ENSG00000257924	2.35342	Up	lncRNA	LINC02416	TCGA-LIHC
ENSG00000258028	3.59573	Up	lncRNA		TCGA-LIHC
ENSG00000258038	4.44256	Up	lncRNA	LINC02327	TCGA-LIHC
ENSG00000258053	3.05688	Up	lncRNA		TCGA-LIHC
ENSG00000258077	1.08121	Up	lncRNA		TCGA-LIHC
ENSG00000258081	3.0806	Up	lncRNA		TCGA-LIHC
ENSG00000258082	1.29667	Up	lncRNA		TCGA-LIHC
ENSG00000258088	1.68094	Up	lncRNA		TCGA-LIHC
ENSG00000258092	1.26555	Up	lncRNA		TCGA-LIHC
ENSG00000258125	5.74444	Up	lncRNA		TCGA-LIHC
ENSG00000258169	2.43227	Up	lncRNA	LINC00485	TCGA-LIHC
ENSG00000258172	2.10505	Up	lncRNA		TCGA-LIHC
ENSG00000258210	1.0565	Up	lncRNA		TCGA-LIHC
ENSG00000258240	2.92441	Up	lncRNA		TCGA-LIHC
ENSG00000258260	1.82578	Up	lncRNA		TCGA-LIHC
ENSG00000258285	1.65035	Up	lncRNA	TESC-AS1	TCGA-LIHC
ENSG00000258314	3.49296	Up	lncRNA		TCGA-LIHC
ENSG00000258334	1.61773	Up	lncRNA		TCGA-LIHC
ENSG00000258344	1.39875	Up	lncRNA		TCGA-LIHC
ENSG00000258365	1.20702	Up	lncRNA		TCGA-LIHC
ENSG00000258384	1.27253	Up	lncRNA	RCCD1-AS1	TCGA-LIHC
ENSG00000258399	1.45912	Up	lncRNA		TCGA-LIHC
ENSG00000258435	2.07366	Up	lncRNA		TCGA-LIHC
ENSG00000258458	1.59888	Up	lncRNA		TCGA-LIHC
ENSG00000258474	3.66669	Up	lncRNA	LINC02313	TCGA-LIHC
ENSG00000258479	1.91998	Up	lncRNA	LINC00640	TCGA-LIHC
ENSG00000258512	1.55611	Up	lncRNA	LINC00239	TCGA-LIHC
ENSG00000258515	1.07639	Up	lncRNA		TCGA-LIHC
ENSG00000258525	3.13574	Up	lncRNA		TCGA-LIHC
ENSG00000258545	1.37019	Up	lncRNA	RHOXF1-AS1	TCGA-LIHC
ENSG00000258548	2.88931	Up	lncRNA	LINC00645	TCGA-LIHC
ENSG00000258558	1.1546	Up	lncRNA		TCGA-LIHC
ENSG00000258559	1.07793	Up	lncRNA		TCGA-LIHC
ENSG00000258569	1.24337	Up	lncRNA		TCGA-LIHC
ENSG00000258593	1.27411	Up	lncRNA		TCGA-LIHC
ENSG00000258609	3.21986	Up	lncRNA	LINC-ROR	TCGA-LIHC
ENSG00000258634	1.24072	Up	lncRNA		TCGA-LIHC
ENSG00000258647	1.32063	Up	lncRNA	LINC00930	TCGA-LIHC
ENSG00000258651	1.13458	Up	lncRNA	SEC23A-AS1	TCGA-LIHC
ENSG00000258654	2.11922	Up	lncRNA		TCGA-LIHC
ENSG00000258673	1.9456	Up	lncRNA	LINC01397	TCGA-LIHC
ENSG00000258689	3.16547	Up	lncRNA	LINC01269	TCGA-LIHC
ENSG00000258725	1.95512	Up	lncRNA	PRC1-AS1	TCGA-LIHC
ENSG00000258727	1.2971	Up	lncRNA		TCGA-LIHC
ENSG00000258754	2.88603	Up	lncRNA	LINC01579	TCGA-LIHC
ENSG00000258763	2.51961	Up	lncRNA		TCGA-LIHC
ENSG00000258768	1.02415	Up	lncRNA		TCGA-LIHC
ENSG00000258791	1.5741	Up	lncRNA	LINC00520	TCGA-LIHC
ENSG00000258792	1.40525	Up	lncRNA		TCGA-LIHC
ENSG00000258793	2.05209	Up	lncRNA		TCGA-LIHC
ENSG00000258811	1.73148	Up	lncRNA		TCGA-LIHC
ENSG00000258815	3.05019	Up	lncRNA	LINC02820	TCGA-LIHC
ENSG00000258837	4.29939	Up	lncRNA		TCGA-LIHC
ENSG00000258857	1.53791	Up	lncRNA		TCGA-LIHC
ENSG00000258910	4.94478	Up	lncRNA	LINC01956	TCGA-LIHC
ENSG00000258919	1.9654	Up	lncRNA		TCGA-LIHC
ENSG00000258927	3.65389	Up	lncRNA		TCGA-LIHC
ENSG00000258955	2.7098	Up	lncRNA	LINC00519	TCGA-LIHC
ENSG00000258969	2.4417	Up	lncRNA	LINC02307	TCGA-LIHC
ENSG00000258976	3.02074	Up	lncRNA		TCGA-LIHC
ENSG00000259062	1.34029	Up	lncRNA	ACTN1-AS1	TCGA-LIHC
ENSG00000259087	1.13882	Up	lncRNA		TCGA-LIHC
ENSG00000259091	1.33527	Up	lncRNA	LINC00517	TCGA-LIHC
ENSG00000259126	2.10285	Up	lncRNA		TCGA-LIHC
ENSG00000259129	5.49916	Up	lncRNA	LINC00648	TCGA-LIHC
ENSG00000259153	2.05445	Up	lncRNA		TCGA-LIHC
ENSG00000259209	1.29163	Up	lncRNA		TCGA-LIHC
ENSG00000259215	1.32945	Up	lncRNA		TCGA-LIHC
ENSG00000259219	1.21669	Up	lncRNA		TCGA-LIHC
ENSG00000259225	1.3775	Up	lncRNA	LINC02345	TCGA-LIHC
ENSG00000259230	4.10316	Up	lncRNA	LINC02323	TCGA-LIHC
ENSG00000259251	2.42495	Up	lncRNA		TCGA-LIHC
ENSG00000259265	1.9889	Up	lncRNA		TCGA-LIHC
ENSG00000259322	1.06181	Up	lncRNA		TCGA-LIHC
ENSG00000259342	2.13345	Up	lncRNA		TCGA-LIHC
ENSG00000259345	1.20028	Up	lncRNA		TCGA-LIHC
ENSG00000259349	2.35548	Up	lncRNA		TCGA-LIHC
ENSG00000259363	1.09438	Up	lncRNA		TCGA-LIHC
ENSG00000259408	1.2031	Up	lncRNA		TCGA-LIHC
ENSG00000259436	2.18731	Up	lncRNA		TCGA-LIHC
ENSG00000259439	6.77923	Up	lncRNA	LINC01833	TCGA-LIHC
ENSG00000259442	1.40822	Up	lncRNA		TCGA-LIHC
ENSG00000259457	1.74011	Up	lncRNA		TCGA-LIHC
ENSG00000259459	2.42707	Up	lncRNA	LINC02568	TCGA-LIHC
ENSG00000259469	1.58327	Up	lncRNA		TCGA-LIHC
ENSG00000259471	1.03764	Up	lncRNA	LINC01169	TCGA-LIHC
ENSG00000259485	4.71904	Up	lncRNA	LINC02253	TCGA-LIHC
ENSG00000259488	2.10872	Up	lncRNA		TCGA-LIHC
ENSG00000259503	2.34377	Up	lncRNA		TCGA-LIHC
ENSG00000259504	1.68687	Up	lncRNA		TCGA-LIHC
ENSG00000259577	1.64971	Up	lncRNA	CERNA1	TCGA-LIHC
ENSG00000259582	2.04855	Up	lncRNA		TCGA-LIHC
ENSG00000259605	1.42313	Up	lncRNA		TCGA-LIHC
ENSG00000259616	1.82229	Up	lncRNA		TCGA-LIHC
ENSG00000259631	1.51436	Up	lncRNA		TCGA-LIHC
ENSG00000259644	1.07387	Up	lncRNA		TCGA-LIHC
ENSG00000259647	1.11551	Up	lncRNA		TCGA-LIHC
ENSG00000259666	1.9748	Up	lncRNA	LINGO1-AS1	TCGA-LIHC
ENSG00000259692	3.11507	Up	lncRNA		TCGA-LIHC
ENSG00000259705	1.90781	Up	lncRNA		TCGA-LIHC
ENSG00000259712	1.61069	Up	lncRNA		TCGA-LIHC
ENSG00000259717	1.07344	Up	lncRNA	LINC00677	TCGA-LIHC
ENSG00000259732	1.65573	Up	lncRNA		TCGA-LIHC
ENSG00000259755	1.46876	Up	lncRNA		TCGA-LIHC
ENSG00000259760	1.5157	Up	lncRNA		TCGA-LIHC
ENSG00000259772	2.50465	Up	lncRNA		TCGA-LIHC
ENSG00000259780	2.17493	Up	lncRNA		TCGA-LIHC
ENSG00000259786	3.98437	Up	lncRNA	LINC02109	TCGA-LIHC
ENSG00000259804	1.2065	Up	lncRNA		TCGA-LIHC
ENSG00000259807	1.12382	Up	lncRNA		TCGA-LIHC
ENSG00000259828	2.76879	Up	lncRNA		TCGA-LIHC
ENSG00000259863	1.02278	Up	lncRNA	SH3RF3-AS1	TCGA-LIHC
ENSG00000259865	1.28941	Up	lncRNA		TCGA-LIHC
ENSG00000259867	2.95176	Up	lncRNA		TCGA-LIHC
ENSG00000259868	3.25555	Up	lncRNA		TCGA-LIHC
ENSG00000259876	3.93685	Up	lncRNA		TCGA-LIHC
ENSG00000259878	2.07175	Up	lncRNA		TCGA-LIHC
ENSG00000259883	1.35277	Up	lncRNA	EHD4-AS1	TCGA-LIHC
ENSG00000259887	2.30242	Up	lncRNA	FIGNL2-DT	TCGA-LIHC
ENSG00000259891	1.4961	Up	lncRNA		TCGA-LIHC
ENSG00000259895	2.15571	Up	lncRNA		TCGA-LIHC
ENSG00000259899	3.91682	Up	lncRNA		TCGA-LIHC
ENSG00000260000	1.05912	Up	lncRNA		TCGA-LIHC
ENSG00000260005	1.04965	Up	lncRNA		TCGA-LIHC
ENSG00000260011	1.14438	Up	lncRNA		TCGA-LIHC
ENSG00000260019	3.2077	Up	lncRNA	LINC01992	TCGA-LIHC
ENSG00000260025	1.25221	Up	lncRNA	CRIM1-DT	TCGA-LIHC
ENSG00000260046	1.36219	Up	lncRNA		TCGA-LIHC
ENSG00000260051	1.65192	Up	lncRNA		TCGA-LIHC
ENSG00000260060	1.10583	Up	lncRNA		TCGA-LIHC
ENSG00000260086	1.19794	Up	lncRNA		TCGA-LIHC
ENSG00000260088	2.17962	Up	lncRNA	DDX59-AS1	TCGA-LIHC
ENSG00000260093	1.40214	Up	lncRNA		TCGA-LIHC
ENSG00000260095	1.67917	Up	lncRNA		TCGA-LIHC
ENSG00000260118	1.19457	Up	lncRNA		TCGA-LIHC
ENSG00000260123	1.41745	Up	lncRNA	CARMAL	TCGA-LIHC
ENSG00000260160	1.348	Up	lncRNA		TCGA-LIHC
ENSG00000260167	1.70737	Up	lncRNA		TCGA-LIHC
ENSG00000260179	1.13724	Up	lncRNA		TCGA-LIHC
ENSG00000260193	1.20657	Up	lncRNA	LINC02846	TCGA-LIHC
ENSG00000260196	1.07468	Up	lncRNA		TCGA-LIHC
ENSG00000260209	2.19296	Up	lncRNA		TCGA-LIHC
ENSG00000260236	1.28278	Up	lncRNA		TCGA-LIHC
ENSG00000260249	1.39934	Up	lncRNA		TCGA-LIHC
ENSG00000260254	2.91555	Up	lncRNA		TCGA-LIHC
ENSG00000260265	2.86996	Up	lncRNA	LINC02562	TCGA-LIHC
ENSG00000260281	1.24246	Up	lncRNA	ITFG1-AS1	TCGA-LIHC
ENSG00000260285	2.11903	Up	lncRNA		TCGA-LIHC
ENSG00000260288	1.3735	Up	lncRNA		TCGA-LIHC
ENSG00000260289	3.80498	Up	lncRNA		TCGA-LIHC
ENSG00000260296	1.02647	Up	lncRNA		TCGA-LIHC
ENSG00000260337	1.09976	Up	lncRNA		TCGA-LIHC
ENSG00000260339	1.77024	Up	lncRNA	HEXA-AS1	TCGA-LIHC
ENSG00000260360	1.14182	Up	lncRNA		TCGA-LIHC
ENSG00000260367	1.27663	Up	lncRNA		TCGA-LIHC
ENSG00000260400	1.13018	Up	lncRNA		TCGA-LIHC
ENSG00000260401	1.42911	Up	lncRNA		TCGA-LIHC
ENSG00000260423	2.131	Up	lncRNA	LINC02367	TCGA-LIHC
ENSG00000260425	1.55575	Up	lncRNA		TCGA-LIHC
ENSG00000260426	3.23776	Up	lncRNA		TCGA-LIHC
ENSG00000260430	1.43572	Up	lncRNA		TCGA-LIHC
ENSG00000260442	2.34405	Up	lncRNA	ATP2A1-AS1	TCGA-LIHC
ENSG00000260473	2.04158	Up	lncRNA		TCGA-LIHC
ENSG00000260493	2.25264	Up	lncRNA		TCGA-LIHC
ENSG00000260495	2.24916	Up	lncRNA		TCGA-LIHC
ENSG00000260498	2.04275	Up	lncRNA		TCGA-LIHC
ENSG00000260507	1.34452	Up	lncRNA		TCGA-LIHC
ENSG00000260563	1.20838	Up	lncRNA		TCGA-LIHC
ENSG00000260572	1.32931	Up	lncRNA		TCGA-LIHC
ENSG00000260577	1.66582	Up	lncRNA		TCGA-LIHC
ENSG00000260585	2.14283	Up	lncRNA		TCGA-LIHC
ENSG00000260589	2.29207	Up	lncRNA	STAM-AS1	TCGA-LIHC
ENSG00000260592	1.83762	Up	lncRNA		TCGA-LIHC
ENSG00000260593	2.24974	Up	lncRNA		TCGA-LIHC
ENSG00000260601	3.87807	Up	lncRNA		TCGA-LIHC
ENSG00000260604	1.73951	Up	lncRNA		TCGA-LIHC
ENSG00000260605	1.3127	Up	lncRNA		TCGA-LIHC
ENSG00000260619	1.06494	Up	lncRNA		TCGA-LIHC
ENSG00000260641	2.73875	Up	lncRNA		TCGA-LIHC
ENSG00000260646	1.8793	Up	lncRNA		TCGA-LIHC
ENSG00000260653	1.79329	Up	lncRNA		TCGA-LIHC
ENSG00000260657	1.49502	Up	lncRNA		TCGA-LIHC
ENSG00000260672	1.41052	Up	lncRNA		TCGA-LIHC
ENSG00000260698	1.01874	Up	lncRNA		TCGA-LIHC
ENSG00000260710	1.31078	Up	lncRNA		TCGA-LIHC
ENSG00000260711	1.00538	Up	lncRNA		TCGA-LIHC
ENSG00000260751	1.2142	Up	lncRNA		TCGA-LIHC
ENSG00000260761	2.32322	Up	lncRNA		TCGA-LIHC
ENSG00000260777	1.88947	Up	lncRNA		TCGA-LIHC
ENSG00000260778	1.21959	Up	lncRNA		TCGA-LIHC
ENSG00000260779	1.46108	Up	lncRNA		TCGA-LIHC
ENSG00000260792	1.76279	Up	lncRNA	LINC02280	TCGA-LIHC
ENSG00000260793	1.55027	Up	lncRNA		TCGA-LIHC
ENSG00000260805	1.06807	Up	lncRNA		TCGA-LIHC
ENSG00000260807	1.10762	Up	lncRNA	CEROX1	TCGA-LIHC
ENSG00000260830	1.33075	Up	lncRNA		TCGA-LIHC
ENSG00000260852	1.53455	Up	lncRNA	FBXL19-AS1	TCGA-LIHC
ENSG00000260853	1.13647	Up	lncRNA		TCGA-LIHC
ENSG00000260874	2.08733	Up	lncRNA		TCGA-LIHC
ENSG00000260878	3.91026	Up	lncRNA		TCGA-LIHC
ENSG00000260887	3.32371	Up	lncRNA	CASC22	TCGA-LIHC
ENSG00000260902	1.51983	Up	lncRNA	LINC02011	TCGA-LIHC
ENSG00000260917	1.49843	Up	lncRNA		TCGA-LIHC
ENSG00000260918	2.34888	Up	lncRNA		TCGA-LIHC
ENSG00000260920	1.02689	Up	lncRNA		TCGA-LIHC
ENSG00000260924	2.17067	Up	lncRNA	LINC01311	TCGA-LIHC
ENSG00000260941	1.54102	Up	lncRNA	LINC00622	TCGA-LIHC
ENSG00000260942	2.32331	Up	lncRNA	CAPN10-DT	TCGA-LIHC
ENSG00000260951	3.86948	Up	lncRNA		TCGA-LIHC
ENSG00000260978	1.93117	Up	lncRNA		TCGA-LIHC
ENSG00000260983	2.04255	Up	lncRNA		TCGA-LIHC
ENSG00000260988	1.13491	Up	lncRNA		TCGA-LIHC
ENSG00000261002	1.09113	Up	lncRNA	VPS39-DT	TCGA-LIHC
ENSG00000261008	2.2076	Up	lncRNA	LINC01572	TCGA-LIHC
ENSG00000261019	1.35403	Up	lncRNA		TCGA-LIHC
ENSG00000261033	1.90563	Up	lncRNA	SPECC1-DT	TCGA-LIHC
ENSG00000261039	1.69331	Up	lncRNA	LINC02544	TCGA-LIHC
ENSG00000261054	2.34898	Up	lncRNA		TCGA-LIHC
ENSG00000261055	1.48199	Up	lncRNA		TCGA-LIHC
ENSG00000261060	1.50062	Up	lncRNA		TCGA-LIHC
ENSG00000261067	1.22007	Up	lncRNA		TCGA-LIHC
ENSG00000261069	1.30367	Up	lncRNA		TCGA-LIHC
ENSG00000261083	1.38683	Up	lncRNA	LINC02516	TCGA-LIHC
ENSG00000261087	1.48272	Up	lncRNA	ZNNT1	TCGA-LIHC
ENSG00000261094	1.06265	Up	lncRNA		TCGA-LIHC
ENSG00000261096	1.17246	Up	lncRNA		TCGA-LIHC
ENSG00000261105	1.25382	Up	lncRNA	LMO7-AS1	TCGA-LIHC
ENSG00000261121	1.87871	Up	lncRNA	LINC02473	TCGA-LIHC
ENSG00000261135	1.25271	Up	lncRNA		TCGA-LIHC
ENSG00000261136	2.09595	Up	lncRNA		TCGA-LIHC
ENSG00000261159	2.20012	Up	lncRNA		TCGA-LIHC
ENSG00000261168	1.92687	Up	lncRNA		TCGA-LIHC
ENSG00000261172	1.73085	Up	lncRNA		TCGA-LIHC
ENSG00000261175	2.76176	Up	lncRNA	LINC02188	TCGA-LIHC
ENSG00000261183	1.2302	Up	lncRNA	SPINT1-AS1	TCGA-LIHC
ENSG00000261186	1.72753	Up	lncRNA	LINC01238	TCGA-LIHC
ENSG00000261207	1.36231	Up	lncRNA		TCGA-LIHC
ENSG00000261211	1.33236	Up	lncRNA		TCGA-LIHC
ENSG00000261220	1.83703	Up	lncRNA	ST3GAL1-DT	TCGA-LIHC
ENSG00000261253	1.02306	Up	lncRNA		TCGA-LIHC
ENSG00000261268	1.98526	Up	lncRNA		TCGA-LIHC
ENSG00000261296	1.95667	Up	lncRNA		TCGA-LIHC
ENSG00000261319	3.61905	Up	lncRNA	LINC02152	TCGA-LIHC
ENSG00000261324	1.11528	Up	lncRNA		TCGA-LIHC
ENSG00000261326	1.29653	Up	lncRNA	LINC01355	TCGA-LIHC
ENSG00000261334	1.30498	Up	lncRNA		TCGA-LIHC
ENSG00000261335	1.166	Up	lncRNA		TCGA-LIHC
ENSG00000261342	2.38179	Up	lncRNA		TCGA-LIHC
ENSG00000261357	2.22441	Up	lncRNA		TCGA-LIHC
ENSG00000261360	1.06144	Up	lncRNA	OTULIN-DT	TCGA-LIHC
ENSG00000261379	2.70423	Up	lncRNA		TCGA-LIHC
ENSG00000261386	1.67484	Up	lncRNA		TCGA-LIHC
ENSG00000261396	1.83639	Up	lncRNA		TCGA-LIHC
ENSG00000261426	3.25994	Up	lncRNA		TCGA-LIHC
ENSG00000261460	1.29343	Up	lncRNA		TCGA-LIHC
ENSG00000261502	2.6973	Up	lncRNA		TCGA-LIHC
ENSG00000261520	2.5263	Up	lncRNA	DLGAP1-AS5	TCGA-LIHC
ENSG00000261526	1.27531	Up	lncRNA		TCGA-LIHC
ENSG00000261537	1.55154	Up	lncRNA		TCGA-LIHC
ENSG00000261586	1.85066	Up	lncRNA		TCGA-LIHC
ENSG00000261600	1.37477	Up	lncRNA		TCGA-LIHC
ENSG00000261625	1.01332	Up	lncRNA		TCGA-LIHC
ENSG00000261634	2.37489	Up	lncRNA	PAQR5-DT	TCGA-LIHC
ENSG00000261637	1.44069	Up	lncRNA	LINC02127	TCGA-LIHC
ENSG00000261664	2.44147	Up	lncRNA	TTC39A-AS1	TCGA-LIHC
ENSG00000261693	1.60525	Up	lncRNA		TCGA-LIHC
ENSG00000261713	6.46478	Up	lncRNA	SSTR5-AS1	TCGA-LIHC
ENSG00000261723	1.54239	Up	lncRNA		TCGA-LIHC
ENSG00000261742	2.38899	Up	lncRNA	LINC00922	TCGA-LIHC
ENSG00000261744	1.09622	Up	lncRNA	ZFPM1-AS1	TCGA-LIHC
ENSG00000261758	1.43347	Up	lncRNA	STAG1-DT	TCGA-LIHC
ENSG00000261761	5.48107	Up	lncRNA	LINC02616	TCGA-LIHC
ENSG00000261762	1.18818	Up	lncRNA		TCGA-LIHC
ENSG00000261773	1.60883	Up	lncRNA		TCGA-LIHC
ENSG00000261795	1.51552	Up	lncRNA		TCGA-LIHC
ENSG00000261798	2.88752	Up	lncRNA		TCGA-LIHC
ENSG00000261800	3.1655	Up	lncRNA		TCGA-LIHC
ENSG00000261821	1.88915	Up	lncRNA		TCGA-LIHC
ENSG00000261823	2.09233	Up	lncRNA		TCGA-LIHC
ENSG00000261839	1.03059	Up	lncRNA		TCGA-LIHC
ENSG00000261886	2.83948	Up	lncRNA	GOSR2-DT	TCGA-LIHC
ENSG00000261889	1.39598	Up	lncRNA		TCGA-LIHC
ENSG00000261898	1.01161	Up	lncRNA		TCGA-LIHC
ENSG00000261924	1.47262	Up	lncRNA		TCGA-LIHC
ENSG00000262001	1.10773	Up	lncRNA	DLGAP1-AS2	TCGA-LIHC
ENSG00000262097	1.59284	Up	lncRNA	LINC02185	TCGA-LIHC
ENSG00000262115	1.77226	Up	lncRNA		TCGA-LIHC
ENSG00000262136	3.74775	Up	lncRNA	NQO1-DT	TCGA-LIHC
ENSG00000262147	1.04522	Up	lncRNA		TCGA-LIHC
ENSG00000262172	3.30559	Up	lncRNA		TCGA-LIHC
ENSG00000262188	1.12115	Up	lncRNA	LINC01978	TCGA-LIHC
ENSG00000262198	2.34892	Up	lncRNA		TCGA-LIHC
ENSG00000262223	1.93369	Up	lncRNA		TCGA-LIHC
ENSG00000262267	2.38321	Up	lncRNA		TCGA-LIHC
ENSG00000262332	1.16521	Up	lncRNA		TCGA-LIHC
ENSG00000262410	2.21895	Up	lncRNA		TCGA-LIHC
ENSG00000262412	1.50627	Up	lncRNA		TCGA-LIHC
ENSG00000262482	1.17801	Up	lncRNA		TCGA-LIHC
ENSG00000262580	1.30264	Up	lncRNA		TCGA-LIHC
ENSG00000262663	1.36224	Up	lncRNA		TCGA-LIHC
ENSG00000262681	1.21681	Up	lncRNA		TCGA-LIHC
ENSG00000262686	1.29435	Up	lncRNA	GLIS2-AS1	TCGA-LIHC
ENSG00000262692	1.14281	Up	lncRNA		TCGA-LIHC
ENSG00000262703	2.38637	Up	lncRNA		TCGA-LIHC
ENSG00000262712	1.40077	Up	lncRNA		TCGA-LIHC
ENSG00000262768	2.20726	Up	lncRNA		TCGA-LIHC
ENSG00000262772	3.08064	Up	lncRNA	LINC01977	TCGA-LIHC
ENSG00000262877	2.10482	Up	lncRNA		TCGA-LIHC
ENSG00000262903	1.80759	Up	lncRNA		TCGA-LIHC
ENSG00000262966	1.23985	Up	lncRNA		TCGA-LIHC
ENSG00000263080	2.06228	Up	lncRNA		TCGA-LIHC
ENSG00000263089	1.41994	Up	lncRNA		TCGA-LIHC
ENSG00000263257	3.13065	Up	lncRNA		TCGA-LIHC
ENSG00000263321	1.16088	Up	lncRNA		TCGA-LIHC
ENSG00000263345	1.06779	Up	lncRNA		TCGA-LIHC
ENSG00000263412	2.80411	Up	lncRNA	NFE2L1-DT	TCGA-LIHC
ENSG00000263427	2.26866	Up	lncRNA		TCGA-LIHC
ENSG00000263443	3.05872	Up	lncRNA		TCGA-LIHC
ENSG00000263551	2.49771	Up	lncRNA		TCGA-LIHC
ENSG00000263574	2.28037	Up	lncRNA		TCGA-LIHC
ENSG00000263612	1.54605	Up	lncRNA		TCGA-LIHC
ENSG00000263627	1.29509	Up	lncRNA	PPP4R1-AS1	TCGA-LIHC
ENSG00000263680	4.02282	Up	lncRNA		TCGA-LIHC
ENSG00000263711	4.92456	Up	lncRNA	LINC02864	TCGA-LIHC
ENSG00000263727	1.30518	Up	lncRNA		TCGA-LIHC
ENSG00000263731	1.071	Up	lncRNA		TCGA-LIHC
ENSG00000263745	3.78928	Up	lncRNA		TCGA-LIHC
ENSG00000263786	1.37582	Up	lncRNA		TCGA-LIHC
ENSG00000263826	1.24044	Up	lncRNA		TCGA-LIHC
ENSG00000263843	1.42925	Up	lncRNA	MIF4GD-DT	TCGA-LIHC
ENSG00000263893	2.24841	Up	lncRNA		TCGA-LIHC
ENSG00000263990	1.18878	Up	lncRNA		TCGA-LIHC
ENSG00000264026	1.84174	Up	lncRNA	LINC02003	TCGA-LIHC
ENSG00000264080	3.55512	Up	lncRNA		TCGA-LIHC
ENSG00000264112	1.242	Up	lncRNA		TCGA-LIHC
ENSG00000264448	1.35513	Up	lncRNA	MIR378D2HG	TCGA-LIHC
ENSG00000264520	1.12546	Up	lncRNA		TCGA-LIHC
ENSG00000264548	2.58169	Up	lncRNA		TCGA-LIHC
ENSG00000264577	1.07093	Up	lncRNA		TCGA-LIHC
ENSG00000264630	1.14215	Up	lncRNA	PRKCA-AS1	TCGA-LIHC
ENSG00000264705	1.55541	Up	lncRNA		TCGA-LIHC
ENSG00000264727	1.93864	Up	lncRNA		TCGA-LIHC
ENSG00000264735	1.93633	Up	lncRNA		TCGA-LIHC
ENSG00000264769	2.40169	Up	lncRNA		TCGA-LIHC
ENSG00000264785	3.8832	Up	lncRNA		TCGA-LIHC
ENSG00000264808	1.39511	Up	lncRNA		TCGA-LIHC
ENSG00000264956	3.07457	Up	lncRNA		TCGA-LIHC
ENSG00000265046	2.10915	Up	lncRNA		TCGA-LIHC
ENSG00000265055	1.74981	Up	lncRNA		TCGA-LIHC
ENSG00000265096	2.45298	Up	lncRNA	C1QTNF1-AS1	TCGA-LIHC
ENSG00000265100	1.98589	Up	lncRNA		TCGA-LIHC
ENSG00000265206	1.17703	Up	lncRNA		TCGA-LIHC
ENSG00000265217	3.19518	Up	lncRNA		TCGA-LIHC
ENSG00000265222	1.25153	Up	lncRNA		TCGA-LIHC
ENSG00000265342	2.14553	Up	lncRNA		TCGA-LIHC
ENSG00000265393	1.27531	Up	lncRNA		TCGA-LIHC
ENSG00000265408	1.61019	Up	lncRNA		TCGA-LIHC
ENSG00000265413	1.02298	Up	lncRNA		TCGA-LIHC
ENSG00000265415	2.63852	Up	lncRNA		TCGA-LIHC
ENSG00000265554	2.52988	Up	lncRNA		TCGA-LIHC
ENSG00000265579	1.87841	Up	lncRNA		TCGA-LIHC
ENSG00000265688	2.93444	Up	lncRNA	MAFG-DT	TCGA-LIHC
ENSG00000265692	2.51907	Up	lncRNA	LINC01970	TCGA-LIHC
ENSG00000265702	1.59186	Up	lncRNA		TCGA-LIHC
ENSG00000265717	3.18444	Up	lncRNA		TCGA-LIHC
ENSG00000265728	2.20267	Up	lncRNA		TCGA-LIHC
ENSG00000265750	1.6657	Up	lncRNA		TCGA-LIHC
ENSG00000265791	1.26327	Up	lncRNA		TCGA-LIHC
ENSG00000265912	1.7236	Up	lncRNA		TCGA-LIHC
ENSG00000265933	5.30756	Up	lncRNA	LINC00668	TCGA-LIHC
ENSG00000265984	1.72154	Up	lncRNA	GREB1L-DT	TCGA-LIHC
ENSG00000266261	1.88822	Up	lncRNA		TCGA-LIHC
ENSG00000266289	1.29183	Up	lncRNA		TCGA-LIHC
ENSG00000266313	1.67217	Up	lncRNA		TCGA-LIHC
ENSG00000266401	4.45792	Up	lncRNA		TCGA-LIHC
ENSG00000266402	2.30158	Up	lncRNA	SNHG25	TCGA-LIHC
ENSG00000266441	2.41912	Up	lncRNA	ARHGAP28-AS1	TCGA-LIHC
ENSG00000266445	1.33828	Up	lncRNA	NARF-AS1	TCGA-LIHC
ENSG00000266450	2.10249	Up	lncRNA		TCGA-LIHC
ENSG00000266456	3.13005	Up	lncRNA		TCGA-LIHC
ENSG00000266490	1.50445	Up	lncRNA		TCGA-LIHC
ENSG00000266579	1.17556	Up	lncRNA		TCGA-LIHC
ENSG00000266602	3.08219	Up	lncRNA		TCGA-LIHC
ENSG00000266651	1.01566	Up	lncRNA		TCGA-LIHC
ENSG00000266717	1.46876	Up	lncRNA		TCGA-LIHC
ENSG00000266729	2.40811	Up	lncRNA	DSG1-AS1	TCGA-LIHC
ENSG00000266743	2.47766	Up	lncRNA		TCGA-LIHC
ENSG00000266821	1.27075	Up	lncRNA		TCGA-LIHC
ENSG00000266830	4.33212	Up	lncRNA		TCGA-LIHC
ENSG00000266835	3.00649	Up	lncRNA	GAPLINC	TCGA-LIHC
ENSG00000266869	2.49071	Up	lncRNA		TCGA-LIHC
ENSG00000266916	1.73039	Up	lncRNA	ZNF793-AS1	TCGA-LIHC
ENSG00000266936	1.28034	Up	lncRNA		TCGA-LIHC
ENSG00000266950	1.24981	Up	lncRNA		TCGA-LIHC
ENSG00000266976	6.22179	Up	lncRNA		TCGA-LIHC
ENSG00000266980	1.31948	Up	lncRNA		TCGA-LIHC
ENSG00000266998	1.72283	Up	lncRNA		TCGA-LIHC
ENSG00000267013	2.70663	Up	lncRNA	LINC01929	TCGA-LIHC
ENSG00000267014	5.26629	Up	lncRNA	LINC01532	TCGA-LIHC
ENSG00000267015	5.13836	Up	lncRNA		TCGA-LIHC
ENSG00000267048	1.21416	Up	lncRNA		TCGA-LIHC
ENSG00000267053	2.49354	Up	lncRNA		TCGA-LIHC
ENSG00000267092	1.18444	Up	lncRNA		TCGA-LIHC
ENSG00000267096	1.27123	Up	lncRNA		TCGA-LIHC
ENSG00000267114	1.54225	Up	lncRNA		TCGA-LIHC
ENSG00000267123	1.18183	Up	lncRNA	SCAT1	TCGA-LIHC
ENSG00000267128	2.58781	Up	lncRNA	RNF157-AS1	TCGA-LIHC
ENSG00000267130	1.38602	Up	lncRNA		TCGA-LIHC
ENSG00000267138	1.12012	Up	lncRNA		TCGA-LIHC
ENSG00000267147	3.02637	Up	lncRNA	LINC01842	TCGA-LIHC
ENSG00000267150	2.122	Up	lncRNA		TCGA-LIHC
ENSG00000267191	1.93944	Up	lncRNA	ZNF45-AS1	TCGA-LIHC
ENSG00000267197	1.35832	Up	lncRNA		TCGA-LIHC
ENSG00000267201	2.38358	Up	lncRNA	LINC01775	TCGA-LIHC
ENSG00000267213	1.58092	Up	lncRNA	DPY19L3-DT	TCGA-LIHC
ENSG00000267243	4.16257	Up	lncRNA		TCGA-LIHC
ENSG00000267247	2.02615	Up	lncRNA		TCGA-LIHC
ENSG00000267251	1.99685	Up	lncRNA		TCGA-LIHC
ENSG00000267254	1.0074	Up	lncRNA	ZNF790-AS1	TCGA-LIHC
ENSG00000267260	2.65973	Up	lncRNA		TCGA-LIHC
ENSG00000267279	1.48543	Up	lncRNA		TCGA-LIHC
ENSG00000267280	1.54534	Up	lncRNA	TBX2-AS1	TCGA-LIHC
ENSG00000267284	3.86361	Up	lncRNA		TCGA-LIHC
ENSG00000267288	1.28308	Up	lncRNA		TCGA-LIHC
ENSG00000267289	1.26345	Up	lncRNA	PIN1-DT	TCGA-LIHC
ENSG00000267296	1.06999	Up	lncRNA	CEBPA-DT	TCGA-LIHC
ENSG00000267327	3.83805	Up	lncRNA		TCGA-LIHC
ENSG00000267339	4.12357	Up	lncRNA	LINC00906	TCGA-LIHC
ENSG00000267342	1.07568	Up	lncRNA		TCGA-LIHC
ENSG00000267348	1.15772	Up	lncRNA	GEMIN7-AS1	TCGA-LIHC
ENSG00000267383	1.52608	Up	lncRNA		TCGA-LIHC
ENSG00000267394	1.24422	Up	lncRNA	ATXN7L3-AS1	TCGA-LIHC
ENSG00000267413	3.70917	Up	lncRNA	LINC01901	TCGA-LIHC
ENSG00000267416	1.24468	Up	lncRNA	HEATR6-DT	TCGA-LIHC
ENSG00000267421	1.22595	Up	lncRNA	ZFP28-DT	TCGA-LIHC
ENSG00000267424	2.71238	Up	lncRNA		TCGA-LIHC
ENSG00000267470	1.3151	Up	lncRNA	ZNF571-AS1	TCGA-LIHC
ENSG00000267501	1.18193	Up	lncRNA		TCGA-LIHC
ENSG00000267512	1.20183	Up	lncRNA		TCGA-LIHC
ENSG00000267523	1.32126	Up	lncRNA		TCGA-LIHC
ENSG00000267530	1.17033	Up	lncRNA	LINC01836	TCGA-LIHC
ENSG00000267546	1.26217	Up	lncRNA		TCGA-LIHC
ENSG00000267551	1.90916	Up	lncRNA	GNA15-DT	TCGA-LIHC
ENSG00000267567	1.14757	Up	lncRNA		TCGA-LIHC
ENSG00000267583	1.41815	Up	lncRNA		TCGA-LIHC
ENSG00000267605	2.2961	Up	lncRNA		TCGA-LIHC
ENSG00000267649	1.17749	Up	lncRNA		TCGA-LIHC
ENSG00000267650	1.91483	Up	lncRNA		TCGA-LIHC
ENSG00000267670	2.96119	Up	lncRNA		TCGA-LIHC
ENSG00000267683	3.22516	Up	lncRNA		TCGA-LIHC
ENSG00000267698	1.45058	Up	lncRNA		TCGA-LIHC
ENSG00000267707	1.30538	Up	lncRNA		TCGA-LIHC
ENSG00000267750	1.36378	Up	lncRNA	RUNDC3A-AS1	TCGA-LIHC
ENSG00000267751	2.19544	Up	lncRNA	BSG-AS1	TCGA-LIHC
ENSG00000267769	1.78931	Up	lncRNA		TCGA-LIHC
ENSG00000267778	2.27833	Up	lncRNA	CBARP-DT	TCGA-LIHC
ENSG00000267783	1.29227	Up	lncRNA		TCGA-LIHC
ENSG00000267811	1.10443	Up	lncRNA		TCGA-LIHC
ENSG00000267834	2.1358	Up	lncRNA		TCGA-LIHC
ENSG00000267838	1.49098	Up	lncRNA		TCGA-LIHC
ENSG00000267886	3.33023	Up	lncRNA		TCGA-LIHC
ENSG00000267890	3.65193	Up	lncRNA		TCGA-LIHC
ENSG00000267905	2.92412	Up	lncRNA	VSIG10L-AS1	TCGA-LIHC
ENSG00000267924	3.62496	Up	lncRNA		TCGA-LIHC
ENSG00000267934	1.69052	Up	lncRNA		TCGA-LIHC
ENSG00000267980	1.18302	Up	lncRNA		TCGA-LIHC
ENSG00000267986	1.34516	Up	lncRNA		TCGA-LIHC
ENSG00000268030	1.10135	Up	lncRNA		TCGA-LIHC
ENSG00000268047	1.00493	Up	lncRNA		TCGA-LIHC
ENSG00000268066	1.23022	Up	lncRNA	FMR1-AS1	TCGA-LIHC
ENSG00000268069	1.07002	Up	lncRNA		TCGA-LIHC
ENSG00000268093	1.47205	Up	lncRNA		TCGA-LIHC
ENSG00000268095	1.04772	Up	lncRNA	ZNF649-AS1	TCGA-LIHC
ENSG00000268119	2.47356	Up	lncRNA		TCGA-LIHC
ENSG00000268157	1.53952	Up	lncRNA		TCGA-LIHC
ENSG00000268189	1.55742	Up	lncRNA		TCGA-LIHC
ENSG00000268201	1.52154	Up	lncRNA		TCGA-LIHC
ENSG00000268307	1.98188	Up	lncRNA	LINC02560	TCGA-LIHC
ENSG00000268401	1.86887	Up	lncRNA		TCGA-LIHC
ENSG00000268403	2.39698	Up	lncRNA		TCGA-LIHC
ENSG00000268573	1.19495	Up	lncRNA		TCGA-LIHC
ENSG00000268621	2.80579	Up	lncRNA	IGFL2-AS1	TCGA-LIHC
ENSG00000268635	1.24701	Up	lncRNA		TCGA-LIHC
ENSG00000268649	2.73874	Up	lncRNA		TCGA-LIHC
ENSG00000268654	1.95987	Up	lncRNA	MIMT1	TCGA-LIHC
ENSG00000268658	2.80362	Up	lncRNA	LINC00664	TCGA-LIHC
ENSG00000268670	1.26724	Up	lncRNA		TCGA-LIHC
ENSG00000268678	1.0109	Up	lncRNA		TCGA-LIHC
ENSG00000268686	2.25987	Up	lncRNA		TCGA-LIHC
ENSG00000268756	1.35283	Up	lncRNA		TCGA-LIHC
ENSG00000268894	1.81257	Up	lncRNA	PLCE1-AS1	TCGA-LIHC
ENSG00000268896	1.54808	Up	lncRNA		TCGA-LIHC
ENSG00000268938	1.13869	Up	lncRNA		TCGA-LIHC
ENSG00000268941	2.65814	Up	lncRNA	LINC01711	TCGA-LIHC
ENSG00000268947	1.40945	Up	lncRNA		TCGA-LIHC
ENSG00000268981	3.03652	Up	lncRNA		TCGA-LIHC
ENSG00000269043	2.26943	Up	lncRNA		TCGA-LIHC
ENSG00000269125	1.08413	Up	lncRNA		TCGA-LIHC
ENSG00000269148	1.02188	Up	lncRNA		TCGA-LIHC
ENSG00000269161	1.39125	Up	lncRNA		TCGA-LIHC
ENSG00000269191	1.9577	Up	lncRNA		TCGA-LIHC
ENSG00000269220	1.68782	Up	lncRNA	LINC00528	TCGA-LIHC
ENSG00000269235	1.29488	Up	lncRNA	ZNF350-AS1	TCGA-LIHC
ENSG00000269246	2.52957	Up	lncRNA		TCGA-LIHC
ENSG00000269275	1.36119	Up	lncRNA		TCGA-LIHC
ENSG00000269289	4.69755	Up	lncRNA		TCGA-LIHC
ENSG00000269296	1.13185	Up	lncRNA		TCGA-LIHC
ENSG00000269303	1.10183	Up	lncRNA	GRAMD1A-AS1	TCGA-LIHC
ENSG00000269352	1.07198	Up	lncRNA	PTOV1-AS2	TCGA-LIHC
ENSG00000269376	2.41187	Up	lncRNA		TCGA-LIHC
ENSG00000269392	1.31281	Up	lncRNA		TCGA-LIHC
ENSG00000269397	1.28948	Up	lncRNA		TCGA-LIHC
ENSG00000269416	4.57835	Up	lncRNA	LINC01224	TCGA-LIHC
ENSG00000269420	1.76955	Up	lncRNA	PLA2G4C-AS1	TCGA-LIHC
ENSG00000269473	1.58013	Up	lncRNA	ZNF132-DT	TCGA-LIHC
ENSG00000269489	2.31854	Up	lncRNA		TCGA-LIHC
ENSG00000269514	1.73084	Up	lncRNA		TCGA-LIHC
ENSG00000269534	1.87269	Up	lncRNA		TCGA-LIHC
ENSG00000269560	1.23329	Up	lncRNA		TCGA-LIHC
ENSG00000269646	1.44063	Up	lncRNA		TCGA-LIHC
ENSG00000269793	2.28587	Up	lncRNA	ZIM2-AS1	TCGA-LIHC
ENSG00000269815	1.48701	Up	lncRNA		TCGA-LIHC
ENSG00000269821	1.225	Up	lncRNA	KCNQ1OT1	TCGA-LIHC
ENSG00000269842	1.80146	Up	lncRNA		TCGA-LIHC
ENSG00000269846	1.26072	Up	lncRNA		TCGA-LIHC
ENSG00000269873	1.44232	Up	lncRNA		TCGA-LIHC
ENSG00000269903	1.0648	Up	lncRNA		TCGA-LIHC
ENSG00000269959	1.56181	Up	lncRNA	SPACA6P-AS	TCGA-LIHC
ENSG00000269978	3.28636	Up	lncRNA		TCGA-LIHC
ENSG00000269994	3.48745	Up	lncRNA	LINC02893	TCGA-LIHC
ENSG00000269997	1.45774	Up	lncRNA		TCGA-LIHC
ENSG00000270002	1.88476	Up	lncRNA		TCGA-LIHC
ENSG00000270012	1.347	Up	lncRNA		TCGA-LIHC
ENSG00000270020	1.18283	Up	lncRNA		TCGA-LIHC
ENSG00000270035	2.79414	Up	lncRNA		TCGA-LIHC
ENSG00000270038	4.05417	Up	lncRNA		TCGA-LIHC
ENSG00000270050	1.75345	Up	lncRNA		TCGA-LIHC
ENSG00000270061	1.2658	Up	lncRNA		TCGA-LIHC
ENSG00000270068	1.25853	Up	lncRNA		TCGA-LIHC
ENSG00000270115	2.2744	Up	lncRNA		TCGA-LIHC
ENSG00000270130	1.37927	Up	lncRNA		TCGA-LIHC
ENSG00000270147	1.24348	Up	lncRNA		TCGA-LIHC
ENSG00000270164	2.26286	Up	lncRNA	LINC01480	TCGA-LIHC
ENSG00000270171	2.56246	Up	lncRNA		TCGA-LIHC
ENSG00000270212	1.54079	Up	lncRNA		TCGA-LIHC
ENSG00000270240	1.2636	Up	lncRNA		TCGA-LIHC
ENSG00000270332	1.29315	Up	lncRNA	SMC2-DT	TCGA-LIHC
ENSG00000270372	6.28941	Up	lncRNA		TCGA-LIHC
ENSG00000270412	3.79654	Up	lncRNA		TCGA-LIHC
ENSG00000270419	1.11163	Up	lncRNA	CAHM	TCGA-LIHC
ENSG00000270426	1.44554	Up	lncRNA		TCGA-LIHC
ENSG00000270460	4.37181	Up	lncRNA		TCGA-LIHC
ENSG00000270547	3.14551	Up	lncRNA	LINC01235	TCGA-LIHC
ENSG00000270557	1.96169	Up	lncRNA		TCGA-LIHC
ENSG00000270562	1.74407	Up	lncRNA		TCGA-LIHC
ENSG00000270604	1.05637	Up	lncRNA	HCG17	TCGA-LIHC
ENSG00000270605	1.01113	Up	lncRNA		TCGA-LIHC
ENSG00000270607	1.61007	Up	lncRNA	NAV2-AS6	TCGA-LIHC
ENSG00000270816	7.92029	Up	lncRNA	LINC00221	TCGA-LIHC
ENSG00000270933	2.8331	Up	lncRNA		TCGA-LIHC
ENSG00000270937	2.21688	Up	lncRNA		TCGA-LIHC
ENSG00000270951	1.16034	Up	lncRNA		TCGA-LIHC
ENSG00000271032	1.71207	Up	lncRNA		TCGA-LIHC
ENSG00000271151	2.15536	Up	lncRNA		TCGA-LIHC
ENSG00000271200	2.14128	Up	lncRNA	PATJ-DT	TCGA-LIHC
ENSG00000271204	1.51389	Up	lncRNA		TCGA-LIHC
ENSG00000271218	2.41831	Up	lncRNA		TCGA-LIHC
ENSG00000271259	2.18724	Up	lncRNA		TCGA-LIHC
ENSG00000271265	1.32625	Up	lncRNA		TCGA-LIHC
ENSG00000271270	1.58197	Up	lncRNA	TMCC1-DT	TCGA-LIHC
ENSG00000271327	2.10345	Up	lncRNA		TCGA-LIHC
ENSG00000271335	1.09057	Up	lncRNA	CCNY-AS1	TCGA-LIHC
ENSG00000271344	1.53711	Up	lncRNA		TCGA-LIHC
ENSG00000271382	1.18811	Up	lncRNA		TCGA-LIHC
ENSG00000271387	3.13867	Up	lncRNA	C1orf21-DT	TCGA-LIHC
ENSG00000271398	1.76365	Up	lncRNA		TCGA-LIHC
ENSG00000271427	1.74453	Up	lncRNA		TCGA-LIHC
ENSG00000271538	1.46924	Up	lncRNA	LINC02427	TCGA-LIHC
ENSG00000271553	1.1516	Up	lncRNA		TCGA-LIHC
ENSG00000271584	1.05456	Up	lncRNA	LINC02550	TCGA-LIHC
ENSG00000271590	1.83869	Up	lncRNA		TCGA-LIHC
ENSG00000271631	1.60164	Up	lncRNA		TCGA-LIHC
ENSG00000271659	2.20494	Up	lncRNA		TCGA-LIHC
ENSG00000271714	1.0876	Up	lncRNA		TCGA-LIHC
ENSG00000271717	1.54791	Up	lncRNA		TCGA-LIHC
ENSG00000271734	1.16457	Up	lncRNA		TCGA-LIHC
ENSG00000271754	1.62827	Up	lncRNA		TCGA-LIHC
ENSG00000271776	3.2419	Up	lncRNA		TCGA-LIHC
ENSG00000271778	1.62204	Up	lncRNA		TCGA-LIHC
ENSG00000271781	2.51255	Up	lncRNA		TCGA-LIHC
ENSG00000271788	2.56558	Up	lncRNA		TCGA-LIHC
ENSG00000271789	1.20375	Up	lncRNA		TCGA-LIHC
ENSG00000271795	1.66864	Up	lncRNA		TCGA-LIHC
ENSG00000271803	1.63526	Up	lncRNA		TCGA-LIHC
ENSG00000271821	1.47669	Up	lncRNA		TCGA-LIHC
ENSG00000271855	1.34976	Up	lncRNA		TCGA-LIHC
ENSG00000271862	1.1783	Up	lncRNA		TCGA-LIHC
ENSG00000271871	1.04403	Up	lncRNA		TCGA-LIHC
ENSG00000271888	2.18517	Up	lncRNA	JARID2-DT	TCGA-LIHC
ENSG00000271914	2.03649	Up	lncRNA		TCGA-LIHC
ENSG00000271918	1.04145	Up	lncRNA		TCGA-LIHC
ENSG00000271930	3.77134	Up	lncRNA		TCGA-LIHC
ENSG00000271936	1.15399	Up	lncRNA		TCGA-LIHC
ENSG00000271947	1.62342	Up	lncRNA		TCGA-LIHC
ENSG00000271952	1.56014	Up	lncRNA	LINC01954	TCGA-LIHC
ENSG00000271959	2.03734	Up	lncRNA		TCGA-LIHC
ENSG00000271966	1.8919	Up	lncRNA	ARFGEF1-DT	TCGA-LIHC
ENSG00000271973	2.29957	Up	lncRNA		TCGA-LIHC
ENSG00000271983	2.43716	Up	lncRNA		TCGA-LIHC
ENSG00000271991	2.08822	Up	lncRNA	TTC32-DT	TCGA-LIHC
ENSG00000271993	2.10547	Up	lncRNA		TCGA-LIHC
ENSG00000271996	1.37867	Up	lncRNA		TCGA-LIHC
ENSG00000272002	1.19788	Up	lncRNA		TCGA-LIHC
ENSG00000272010	1.00242	Up	lncRNA		TCGA-LIHC
ENSG00000272046	3.75383	Up	lncRNA		TCGA-LIHC
ENSG00000272056	1.12134	Up	lncRNA		TCGA-LIHC
ENSG00000272057	1.78725	Up	lncRNA	ANKH-DT	TCGA-LIHC
ENSG00000272068	3.75823	Up	lncRNA	BCAN-AS1	TCGA-LIHC
ENSG00000272070	1.89414	Up	lncRNA		TCGA-LIHC
ENSG00000272072	1.06332	Up	lncRNA		TCGA-LIHC
ENSG00000272088	1.80527	Up	lncRNA		TCGA-LIHC
ENSG00000272097	2.01113	Up	lncRNA	TMEM14B-DT	TCGA-LIHC
ENSG00000272100	1.29417	Up	lncRNA		TCGA-LIHC
ENSG00000272108	1.96027	Up	lncRNA		TCGA-LIHC
ENSG00000272109	1.28792	Up	lncRNA		TCGA-LIHC
ENSG00000272115	1.14317	Up	lncRNA		TCGA-LIHC
ENSG00000272138	1.9085	Up	lncRNA	LINC01607	TCGA-LIHC
ENSG00000272144	1.63767	Up	lncRNA		TCGA-LIHC
ENSG00000272154	1.92138	Up	lncRNA		TCGA-LIHC
ENSG00000272155	1.04414	Up	lncRNA		TCGA-LIHC
ENSG00000272168	1.88455	Up	lncRNA	CASC15	TCGA-LIHC
ENSG00000272170	1.17917	Up	lncRNA	KLC4-AS1	TCGA-LIHC
ENSG00000272172	1.56473	Up	lncRNA		TCGA-LIHC
ENSG00000272180	1.72734	Up	lncRNA		TCGA-LIHC
ENSG00000272183	1.64459	Up	lncRNA		TCGA-LIHC
ENSG00000272186	1.005	Up	lncRNA	VPS11-DT	TCGA-LIHC
ENSG00000272192	1.65067	Up	lncRNA	PDE7A-DT	TCGA-LIHC
ENSG00000272195	1.22387	Up	lncRNA		TCGA-LIHC
ENSG00000272202	1.74257	Up	lncRNA		TCGA-LIHC
ENSG00000272203	1.29357	Up	lncRNA		TCGA-LIHC
ENSG00000272205	2.36294	Up	lncRNA	POU2F1-DT	TCGA-LIHC
ENSG00000272209	1.13147	Up	lncRNA		TCGA-LIHC
ENSG00000272217	1.05987	Up	lncRNA		TCGA-LIHC
ENSG00000272218	1.89921	Up	lncRNA		TCGA-LIHC
ENSG00000272226	1.36718	Up	lncRNA		TCGA-LIHC
ENSG00000272236	2.36428	Up	lncRNA		TCGA-LIHC
ENSG00000272247	1.02053	Up	lncRNA		TCGA-LIHC
ENSG00000272255	1.27039	Up	lncRNA		TCGA-LIHC
ENSG00000272264	1.11509	Up	lncRNA		TCGA-LIHC
ENSG00000272265	1.59617	Up	lncRNA		TCGA-LIHC
ENSG00000272312	1.73714	Up	lncRNA		TCGA-LIHC
ENSG00000272320	1.05407	Up	lncRNA		TCGA-LIHC
ENSG00000272328	2.30394	Up	lncRNA		TCGA-LIHC
ENSG00000272334	1.29449	Up	lncRNA		TCGA-LIHC
ENSG00000272356	1.26804	Up	lncRNA		TCGA-LIHC
ENSG00000272366	1.96687	Up	lncRNA		TCGA-LIHC
ENSG00000272374	1.63448	Up	lncRNA		TCGA-LIHC
ENSG00000272381	1.35228	Up	lncRNA	LINC02664	TCGA-LIHC
ENSG00000272382	1.55713	Up	lncRNA		TCGA-LIHC
ENSG00000272384	1.34746	Up	lncRNA		TCGA-LIHC
ENSG00000272386	1.06803	Up	lncRNA		TCGA-LIHC
ENSG00000272405	3.7766	Up	lncRNA		TCGA-LIHC
ENSG00000272417	2.71304	Up	lncRNA		TCGA-LIHC
ENSG00000272425	1.69621	Up	lncRNA		TCGA-LIHC
ENSG00000272426	1.3456	Up	lncRNA		TCGA-LIHC
[truncated: 5,807 more rows]
