# Supplementary material for: Prognostic hub gene CBX2 drives a cancer stem cell-like phenotype in HCC revealed by multi-omics and multi-cohorts
Source: Aging (Albany NY). 2023 Nov 17;15(22):12817–51. doi: 10.18632/aging.205173 (PMC10713423; doi:10.18632/aging.205173)
Supplement: Supplementary Table 2 [file aging-15-205173-s003.xlsx]

## Sheet: Table S2
Supplementary Table 2. Univariate Cox analysis of the effects of miRNA, lncRNA, and mRNA on survival time.
id	KM	HR	HR.95L	HR.95H	pvalue	ID
ENSG00000183154	0.200731	0.7939	0.61423	1.02613	0.0779059	LOC102723701	lncRNA
ENSG00000204380	0.152913	3.34208	0.442598	25.2363	0.242099	PKP4-AS1	lncRNA
ENSG00000206195	0.000221504	1.33187	1.1827	1.49985	2.25969e-06	DUXAP8	lncRNA
ENSG00000215068	0.0590323	1.12482	1.02376	1.23586	0.0143351	LOC153684	lncRNA
ENSG00000215424	0.0148839	2.31434	1.54486	3.46709	4.72155e-05	MCM3AP-AS1	lncRNA
ENSG00000223956	0.97375	0.99905	0.991225	1.00694	0.812683	LINC01767	lncRNA
ENSG00000224034	0.028453	1.1584	1.0744	1.24898	0.000129081	LINC02561	lncRNA
ENSG00000225656	0.264473	0.98318	0.918426	1.0525	0.625546	Lnc-C1orf198-1	lncRNA
ENSG00000225765	0.402256	0.998348	0.987087	1.00974	0.775193	LINC01831	lncRNA
ENSG00000225792	0.414803	1.01346	0.982747	1.04513	0.394516	Lnc-HNRNPA2B1-15	lncRNA
ENSG00000225936	0.937537	0.385964	0.0419151	3.55404	0.400649	Lnc-PDZD8-1	lncRNA
ENSG00000226622	0.189207	0.976939	0.551305	1.73118	0.936297	Lnc-TMEM17-2	lncRNA
ENSG00000228139	0.866075	0.942143	0.599008	1.48184	0.796463	LINC01402	lncRNA
ENSG00000229431	0.00601977	1.42775	1.20876	1.68641	2.7675e-05	MED8-AS1	lncRNA
ENSG00000229953	0.640261	1.03116	1.01102	1.05171	0.00229861	Lnc-NES-1	lncRNA
ENSG00000230921	0.280115	0.891949	0.76431	1.0409	0.146725	HAO2-IT1	lncRNA
ENSG00000231703	0.822771	1.89502	0.423001	8.48958	0.403458	Lnc-ZNF217-2	lncRNA
ENSG00000232995	0.031867	4.48273	2.10954	9.5257	9.58062e-05	Lnc-RGS5-1	lncRNA
ENSG00000233554	0.0623638	0.938574	0.873707	1.00826	0.0827505	B4GALT1-AS1	lncRNA
ENSG00000233613	0.356854	0.924737	0.54652	1.5647	0.770599	DCUN1D2-AS	lncRNA
ENSG00000234223	0.185899	0.611599	0.187978	1.98987	0.414018	Lnc-GNAT3-2	lncRNA
ENSG00000234614	0.903944	1.01372	1.00001	1.02761	0.0497909	C2CD4D-AS1	lncRNA
ENSG00000234912	0.000646974	1.10304	1.03922	1.17078	0.001259	SNHG20	lncRNA
ENSG00000236144	0.0673549	1.08443	1.00574	1.16927	0.0349555	TMEM147-AS1	lncRNA
ENSG00000238099	0.27054	0.889104	0.742196	1.06509	0.202094	LINC01625	lncRNA
ENSG00000240498	0.00517727	1.28625	1.0196	1.62264	0.0336951	CDKN2B-AS1	lncRNA
ENSG00000242553	0.00938046	1.31484	1.03656	1.66783	0.0240785	DSCR9	lncRNA
ENSG00000242741	0.468971	1.5552	0.819045	2.953	0.177077	LINC02005	lncRNA
ENSG00000243694	0.518826	1.00378	0.990615	1.01713	0.575103	LINC02027	lncRNA
ENSG00000248740	0.285776	0.985785	0.972499	0.999253	0.038647	LINC02428	lncRNA
ENSG00000248884	0.000267442	0.945967	0.892712	1.0024	0.0602626	Lnc-CCDC125-6	lncRNA
ENSG00000249173	0.0400799	0.998642	0.992997	1.00432	0.638357	LINC01093	lncRNA
ENSG00000250333	0.223923	0.213002	0.0307891	1.47357	0.117092	Lnc-IGFBP7-3	lncRNA
ENSG00000251061	0.25503	0.777009	0.285953	2.11134	0.620819	LINC02512	lncRNA
ENSG00000253696	0.0217297	0.871436	0.515307	1.47369	0.60769	KBTBD11-OT1	lncRNA
ENSG00000255980	0.183505	0.988895	0.927779	1.05404	0.731538	LOC102724265	lncRNA
ENSG00000256948	0.16029	1.07566	0.881779	1.31216	0.472002	Lnc-SLC6A12-4	lncRNA
ENSG00000258545	0.669214	1.01761	0.886561	1.16802	0.804038	RHOXF1-AS1	lncRNA
ENSG00000259881	0.229308	0.780843	0.610403	0.998875	0.0489623	LOC101927793	lncRNA
ENSG00000261481	0.298185	0.971099	0.927438	1.01682	0.211494	CARHSP1-DT	lncRNA
ENSG00000263586	0.217521	0.744503	0.373964	1.48218	0.401007	HID1-AS1	lncRNA
ENSG00000267363	0.23751	1.17463	0.988678	1.39556	0.0671802	Lnc-ZFP14-2	lncRNA
ENSG00000269148	0.0706597	1.25303	0.882245	1.77965	0.20764	HSALNG0126610	lncRNA
ENSG00000270115	0.0346965	1.54278	1.02368	2.32511	0.0382852	Lnc-AZIN2-5	lncRNA
ENSG00000270147	0.620204	1.14085	0.82199	1.5834	0.430762	HSALNG0034586	lncRNA
ENSG00000271218	0.234786	1.40738	1.03003	1.92296	0.0318941	Lnc-KLHL31-8	lncRNA
ENSG00000272068	0.830257	1.02573	0.998288	1.05392	0.0663468	BCAN-AS1	lncRNA
ENSG00000272405	0.568857	1.0157	1.00524	1.02626	0.00317069	Lnc-NES-2	lncRNA
ENSG00000273179	0.242457	1.00606	0.999455	1.01271	0.0721912	Lnc-MAEA-6	lncRNA
ENSG00000273308	0.106727	1.1038	0.865132	1.4083	0.426916	Lnc-FYTTD1-6	lncRNA
ENSG00000273329	0.0403518	1.17555	0.960702	1.43845	0.116266	Lnc-UBE2H-2	lncRNA
ENSG00000273373	0.00130324	1.0626	1.01495	1.11249	0.00949056	Lnc-RBM15-3	lncRNA
hsa-miR-10b-5p	0.176544	1.00001	1	1.00001	0.0512894	hsa-miR-10b-5p	miRNA
hsa-miR-182-5p	0.435143	1.00001	1	1.00002	0.0484203	hsa-miR-182-5p	miRNA
hsa-miR-183-5p	0.210318	1.00003	1	1.00005	0.0209994	hsa-miR-183-5p	miRNA
hsa-miR-424-5p	0.0883355	1.00094	0.99983	1.00206	0.0968069	hsa-miR-424-5p	miRNA
hsa-miR-552-3p	0.455067	0.999434	0.99736	1.00151	0.592962	hsa-miR-552-3p	miRNA
hsa-miR-216b-5p	0.243117	0.999098	0.997679	1.00052	0.213021	hsa-miR-216b-5p	miRNA
hsa-miR-1269b	0.193107	1.00094	1.00049	1.00139	3.94e-05	hsa-miR-1269b	miRNA
hsa-miR-4686	0.23472	0.605589	0.252102	1.45472	0.261987	hsa-miR-4686	miRNA
ENSG00000003249	0.568091	0.999324	0.992423	1.00627	0.848384	DBNDD1	mRNA
ENSG00000005187	0.0828115	0.988741	0.965088	1.01297	0.359357	ACSM3	mRNA
ENSG00000010610	0.110182	1.00025	0.993626	1.00693	0.940241	CD4	mRNA
ENSG00000011426	0.000104309	1.04144	1.02793	1.05513	1.09438e-09	ANLN	mRNA
ENSG00000013016	0.880042	1.0049	0.957089	1.0551	0.844122	EHD3	mRNA
ENSG00000042781	0.14699	0.964536	0.884189	1.05218	0.415824	USH2A	mRNA
ENSG00000043355	0.00331313	1.04854	1.02844	1.06904	1.59189e-06	ZIC2	mRNA
ENSG00000053747	0.572837	0.993926	0.978032	1.01008	0.458866	LAMA3	mRNA
ENSG00000054690	0.00214828	1.16295	1.03763	1.30341	0.00946131	PLEKHH1	mRNA
ENSG00000058404	0.933566	0.975535	0.898461	1.05922	0.55528	CAMK2B	mRNA
ENSG00000059588	0.0117531	1.01245	0.994277	1.03096	0.180592	TARBP1	mRNA
ENSG00000060971	0.0237224	0.998032	0.993524	1.00256	0.393811	ACAA1	mRNA
ENSG00000062282	0.0242129	0.997282	0.993155	1.00143	0.198335	DGAT2	mRNA
ENSG00000062524	0.0503055	0.94415	0.855149	1.04241	0.255264	LTK	mRNA
ENSG00000065328	0.00141238	1.16016	1.10933	1.21332	8.09099e-11	MCM10	mRNA
ENSG00000066279	0.000594181	1.03619	1.01715	1.05558	0.000171839	ASPM	mRNA
ENSG00000071539	1.57617e-05	1.044	1.02896	1.05926	5.98413e-09	TRIP13	mRNA
ENSG00000072694	0.581476	1.01767	1.00097	1.03465	0.0380244	FCGR2B	mRNA
ENSG00000073111	0.000351364	1.01642	1.01034	1.02254	1.04548e-07	MCM2	mRNA
ENSG00000073712	0.64963	0.994458	0.974967	1.01434	0.582158	FERMT2	mRNA
ENSG00000074935	0.155665	0.986132	0.925757	1.05044	0.664847	TUBE1	mRNA
ENSG00000076003	0.000235534	1.01878	1.01228	1.02533	1.209e-08	MCM6	mRNA
ENSG00000076555	0.855866	0.989928	0.973408	1.00673	0.238435	ACACB	mRNA
ENSG00000077152	0.000854786	1.01763	1.01111	1.02419	1.00084e-07	UBE2T	mRNA
ENSG00000078018	0.0755965	1.04343	1.02036	1.06703	0.000194699	MAP2	mRNA
ENSG00000080709	0.885589	0.983629	0.921492	1.04996	0.620037	KCNN2	mRNA
ENSG00000080986	0.000772185	1.05877	1.04054	1.07732	1.16529e-10	NDC80	mRNA
ENSG00000085840	0.001411	1.08235	1.05381	1.11167	6.51049e-09	ORC1	mRNA
ENSG00000087237	0.530178	0.997091	0.980085	1.01439	0.739972	CETP	mRNA
ENSG00000087258	0.831307	0.987258	0.935776	1.04157	0.638839	GNAO1	mRNA
ENSG00000090889	0.000446739	1.02707	1.01568	1.03859	2.69159e-06	KIF4A	mRNA
ENSG00000091622	0.157452	1.07322	0.978735	1.17682	0.132885	PITPNM3	mRNA
ENSG00000091651	0.00209962	1.10357	1.06214	1.14661	4.45344e-07	ORC6	mRNA
ENSG00000091831	9.45187e-05	0.898821	0.80869	0.998998	0.0478649	ESR1	mRNA
ENSG00000091972	0.260219	1.01945	0.970585	1.07078	0.44205	CD200	mRNA
ENSG00000092068	0.0942983	1.02623	1.0094	1.04334	0.00214567	SLC7A8	mRNA
ENSG00000093009	0.00256864	1.04178	1.02466	1.05919	1.28572e-06	CDC45	mRNA
ENSG00000094804	0.0018204	1.03474	1.01985	1.04985	3.89052e-06	CDC6	mRNA
ENSG00000095596	0.979156	0.982248	0.938903	1.02759	0.436661	CYP26A1	mRNA
ENSG00000099769	0.00139963	0.999762	0.997305	1.00223	0.849829	IGFALS	mRNA
ENSG00000100362	0.0579	0.997275	0.876655	1.13449	0.966912	PVALB	mRNA
ENSG00000100625	0.188051	1.13666	0.921103	1.40267	0.232495	SIX4	mRNA
ENSG00000101003	0.000369292	1.05745	1.03848	1.07677	1.47241e-09	GINS1	mRNA
ENSG00000101405	0.769804	0.996488	0.986721	1.00635	0.483855	OXT	mRNA
ENSG00000101412	0.00339844	1.00708	1.0032	1.01098	0.000345411	E2F1	mRNA
ENSG00000102384	0.00139366	1.15824	1.09338	1.22695	5.84831e-07	CENPI	mRNA
ENSG00000103064	0.0171476	1.12162	1.02806	1.2237	0.009803	SLC7A6	mRNA
ENSG00000104938	0.663568	0.972018	0.878494	1.0755	0.582426	CLEC4M	mRNA
ENSG00000105499	0.919427	1.00289	0.978078	1.02833	0.821512	PLA2G4C	mRNA
ENSG00000106031	0.960128	1.021	0.991145	1.05176	0.169877	HOXA13	mRNA
ENSG00000106034	0.210417	0.972262	0.930621	1.01577	0.207845	CPED1	mRNA
ENSG00000107864	0.00178707	0.920486	0.858867	0.986526	0.0190943	CPEB3	mRNA
ENSG00000108381	0.0136774	0.889972	0.782783	1.01184	0.075041	ASPA	mRNA
ENSG00000109182	0.743745	1.06384	0.760647	1.48789	0.717676	CWH43	mRNA
ENSG00000109511	0.0004777	0.988789	0.981324	0.996311	0.00354657	ANXA10	mRNA
ENSG00000109576	0.98698	0.989677	0.967847	1.012	0.361876	AADAT	mRNA
ENSG00000109794	0.016555	0.967886	0.935772	1.0011	0.0579684	FAM149A	mRNA
ENSG00000109805	0.0022364	1.05491	1.0377	1.07239	1.86352e-10	NCAPG	mRNA
ENSG00000110492	0.189449	1.00068	1.00015	1.00122	0.0115359	MDK	mRNA
ENSG00000110799	0.810288	0.995949	0.986405	1.00559	0.408761	VWF	mRNA
ENSG00000111247	0.000883251	1.06253	1.03641	1.0893	1.78395e-06	RAD51AP1	mRNA
ENSG00000112186	0.302352	1.001	0.993268	1.0088	0.800034	CAP2	mRNA
ENSG00000112742	0.00238281	1.10441	1.07127	1.13858	1.67154e-10	TTK	mRNA
ENSG00000113296	0.239741	1.00276	0.9996	1.00592	0.0870559	THBS4	mRNA
ENSG00000113319	0.177359	1.10051	1.00901	1.20031	0.0305737	RASGRF2	mRNA
ENSG00000113594	0.340019	1.00539	0.960023	1.05289	0.819633	LIFR	mRNA
ENSG00000114200	0.639032	1.00133	0.99981	1.00286	0.0862452	BCHE	mRNA
ENSG00000114346	0.00176162	1.04169	1.02563	1.058	2.56067e-07	ECT2	mRNA
ENSG00000114812	0.0152387	0.898677	0.788604	1.02411	0.109038	VIPR1	mRNA
ENSG00000115163	0.000359436	1.05242	1.03579	1.06933	3.26988e-10	CENPA	mRNA
ENSG00000116675	0.00832604	1.06098	1.01974	1.10387	0.00342604	DNAJC6	mRNA
ENSG00000117399	2.81169e-05	1.00819	1.00556	1.01083	9.1759e-10	CDC20	mRNA
ENSG00000117643	0.159587	0.9974	0.964935	1.03096	0.877452	MAN1C1	mRNA
ENSG00000117650	0.00014355	1.03344	1.01897	1.04812	4.84899e-06	NEK2	mRNA
ENSG00000117724	0.00315648	1.0393	1.02249	1.05638	3.58465e-06	CENPF	mRNA
ENSG00000118193	0.0037369	1.14099	1.07882	1.20675	3.94894e-06	KIF14	mRNA
ENSG00000119969	0.00996742	1.08277	1.0348	1.13297	0.000582992	HELLS	mRNA
ENSG00000120279	0.152102	0.977473	0.923951	1.0341	0.427766	MYCT1	mRNA
ENSG00000120334	0.000173699	1.13208	1.08119	1.18535	1.24353e-07	CENPL	mRNA
ENSG00000121152	0.00242783	1.04192	1.02587	1.05823	2.16293e-07	NCAPH	mRNA
ENSG00000121570	0.52035	0.968395	0.348464	2.69121	0.950895	DPPA4	mRNA
ENSG00000121621	0.00166915	1.13229	1.08469	1.18197	1.42456e-08	KIF18A	mRNA
ENSG00000121957	0.000480312	1.18228	1.11674	1.25166	8.68437e-09	GPSM2	mRNA
ENSG00000122223	0.87878	1.05583	0.929381	1.19948	0.403882	CD244	mRNA
ENSG00000122787	0.0542364	0.997186	0.9944	0.99998	0.0483668	AKR1D1	mRNA
ENSG00000123352	0.000262509	1.07971	1.0509	1.10931	2.7327e-08	SPATS2	mRNA
ENSG00000123473	0.00535311	1.15042	1.08234	1.22278	6.71657e-06	STIL	mRNA
ENSG00000123485	0.000867015	1.05823	1.04006	1.07672	1.51812e-10	HJURP	mRNA
ENSG00000123496	0.544032	1.00345	0.99857	1.00835	0.166308	IL13RA2	mRNA
ENSG00000125398	0.0999168	1.00427	1.00079	1.00775	0.0160436	SOX9	mRNA
ENSG00000125885	4.40649e-05	1.10354	1.05767	1.1514	5.40682e-06	MCM8	mRNA
ENSG00000125966	0.273073	1.017	0.995204	1.03927	0.127257	MMP24	mRNA
ENSG00000126759	0.391594	0.991681	0.933051	1.05399	0.788178	CFP	mRNA
ENSG00000126787	0.000400451	1.04575	1.03026	1.06149	4.28675e-09	DLGAP5	mRNA
ENSG00000128266	0.0322004	1.01911	1.00706	1.0313	0.00180967	GNAZ	mRNA
ENSG00000128567	0.0574744	1.0045	0.992843	1.0163	0.450793	PODXL	mRNA
ENSG00000129151	0.0906827	0.995144	0.98669	1.00367	0.26346	BBOX1	mRNA
ENSG00000129173	4.33097e-05	1.07972	1.03521	1.12615	0.000356039	E2F8	mRNA
ENSG00000129810	0.000112031	1.13848	1.08283	1.19698	3.926e-07	SGO1	mRNA
ENSG00000129993	0.243891	0.848999	0.719408	1.00193	0.0527333	CBFA2T3	mRNA
ENSG00000130300	0.121577	0.998453	0.99628	1.00063	0.163484	PLVAP	mRNA
ENSG00000130653	0.064762	0.92614	0.844385	1.01581	0.103678	PNPLA7	mRNA
ENSG00000130707	0.106686	0.999701	0.999388	1.00001	0.0611761	ASS1	mRNA
ENSG00000130812	0.317596	0.989169	0.944027	1.03647	0.647713	ANGPTL6	mRNA
ENSG00000131747	0.000615526	1.01118	1.00661	1.01577	1.51005e-06	TOP2A	mRNA
ENSG00000132639	0.578212	1.00653	0.998896	1.01421	0.0938252	SNAP25	mRNA
ENSG00000132688	0.464624	1.00209	0.996145	1.00807	0.491766	NES	mRNA
ENSG00000132692	0.444208	1.02171	0.99889	1.04506	0.062373	BCAN	mRNA
ENSG00000132854	0.0547897	1.03829	0.960748	1.12209	0.3427	KANK4	mRNA
ENSG00000132938	0.71346	1.17486	0.85768	1.60934	0.315509	MTUS2	mRNA
ENSG00000133800	0.291099	1.01992	1.00136	1.03882	0.0353131	LYVE1	mRNA
ENSG00000134042	0.869871	1.0152	0.861994	1.19563	0.856604	MRO	mRNA
ENSG00000134057	0.000164175	1.01448	1.00988	1.0191	5.81818e-10	CCNB1	mRNA
ENSG00000134690	9.12004e-06	1.03625	1.02598	1.04663	2.50265e-12	CDCA8	mRNA
ENSG00000134769	0.796875	1.01389	0.973499	1.05596	0.50596	DTNA	mRNA
ENSG00000135862	0.115574	1.00323	1.00067	1.00579	0.0132285	LAMC1	mRNA
ENSG00000135919	0.0298512	1.00504	0.999476	1.01063	0.0759166	SERPINE2	mRNA
ENSG00000136011	0.675654	0.975655	0.817275	1.16473	0.785078	STAB2	mRNA
ENSG00000136869	0.564653	1.03482	0.995034	1.07619	0.087073	TLR4	mRNA
ENSG00000136982	0.00313325	1.0554	1.03118	1.08019	5.31226e-06	DSCC1	mRNA
ENSG00000137269	0.00383085	1.03517	1.01238	1.05847	0.00233894	LRRC1	mRNA
ENSG00000137310	0.00166867	1.0118	1.00425	1.01941	0.00213989	TCF19	mRNA
ENSG00000137804	0.0102476	1.01041	1.00462	1.01623	0.00041353	NUSAP1	mRNA
ENSG00000137807	0.0069862	1.05849	1.03669	1.08076	8.71375e-08	KIF23	mRNA
ENSG00000138134	0.0387828	1.05023	0.990041	1.11409	0.103613	STAMBPL1	mRNA
ENSG00000138180	0.000385098	1.03201	1.01885	1.04535	1.50116e-06	CEP55	mRNA
ENSG00000138315	0.55308	0.995993	0.981411	1.01079	0.593697	OIT3	mRNA
ENSG00000138744	0.611528	0.990166	0.96931	1.01147	0.362844	NAAA	mRNA
ENSG00000138778	0.00311585	1.18445	1.11554	1.25762	3.10794e-08	CENPE	mRNA
ENSG00000139734	0.00155569	1.01678	0.988968	1.04537	0.239641	DIAPH3	mRNA
ENSG00000139800	0.0802618	1.09546	1.03924	1.15472	0.000694773	ZIC5	mRNA
ENSG00000140505	0.642214	0.999569	0.998388	1.00075	0.474122	CYP1A2	mRNA
ENSG00000140525	0.00802382	1.06284	1.03362	1.09288	1.82375e-05	FANCI	mRNA
ENSG00000140945	0.865469	1.03211	0.929791	1.14569	0.552932	CDH13	mRNA
ENSG00000141096	0.817296	1.1531	0.980103	1.35664	0.0858625	DPEP3	mRNA
ENSG00000141753	0.0550759	0.99973	0.999417	1.00004	0.0909906	IGFBP4	mRNA
ENSG00000142731	0.000755944	1.13738	1.06949	1.20958	4.14543e-05	PLK4	mRNA
ENSG00000142748	0.0163064	0.994496	0.985978	1.00309	0.208531	FCN3	mRNA
ENSG00000143228	0.000107822	1.04098	1.02555	1.05665	1.3671e-07	NUF2	mRNA
ENSG00000143369	0.610705	1.00209	0.986663	1.01777	0.791606	ECM1	mRNA
ENSG00000143476	0.000487435	1.02607	1.0098	1.0426	0.00159755	DTL	mRNA
ENSG00000143494	0.0660092	1.09556	0.967653	1.24038	0.149625	VASH2	mRNA
ENSG00000145386	0.00130385	1.00502	1.00074	1.00932	0.0214158	CCNA2	mRNA
ENSG00000145708	0.0121564	0.98506	0.960268	1.01049	0.247082	CRHBP	mRNA
ENSG00000145824	0.87219	0.995589	0.986155	1.00511	0.362779	CXCL14	mRNA
ENSG00000146038	0.587357	1.00026	0.997256	1.00327	0.866441	DCDC2	mRNA
ENSG00000146151	0.0907411	1.14877	1.01835	1.2959	0.0240939	HMGCLL1	mRNA
ENSG00000146215	0.112262	1.0031	0.988149	1.01828	0.686024	CRIP3	mRNA
ENSG00000146233	0.740271	0.994487	0.983411	1.00569	0.333337	CYP39A1	mRNA
ENSG00000146670	0.000138288	1.03185	1.01937	1.04448	4.44052e-07	CDCA5	mRNA
ENSG00000146674	0.00956756	1.00065	0.999561	1.00173	0.243559	IGFBP3	mRNA
ENSG00000147003	0.985049	0.998073	0.984897	1.01142	0.776001	CLTRN	mRNA
ENSG00000147113	0.935489	1.02856	0.956831	1.10567	0.445135	DIPK2B	mRNA
ENSG00000147119	0.138286	0.985644	0.957251	1.01488	0.332229	CHST7	mRNA
ENSG00000147206	0.586394	0.795197	0.384756	1.64348	0.536122	NXF3	mRNA
ENSG00000147257	0.370338	0.99997	0.999808	1.00013	0.720435	GPC3	mRNA
ENSG00000147889	0.000542145	1.01507	1.00563	1.02459	0.00169826	CDKN2A	mRNA
ENSG00000148339	0.00386745	0.995317	0.990792	0.999863	0.0435033	SLC25A25	mRNA
ENSG00000148773	0.00647037	1.025	1.01519	1.03491	4.90383e-07	MKI67	mRNA
ENSG00000149557	0.499337	0.980607	0.909436	1.05735	0.610472	FEZ1	mRNA
ENSG00000149609	0.00699776	2.29134	1.50549	3.48741	0.000109263	C20orf144	mRNA
ENSG00000150656	0.087611	0.990913	0.965592	1.0169	0.489487	CNDP1	mRNA
ENSG00000151014	0.956177	0.988076	0.96505	1.01165	0.318705	NOCT	mRNA
ENSG00000151365	0.062162	0.999778	0.99892	1.00064	0.611537	THRSP	mRNA
ENSG00000151690	0.0279722	1.02253	1.00654	1.03877	0.00559185	MFSD6	mRNA
ENSG00000152253	0.000264574	1.06195	1.03984	1.08454	2.16318e-08	SPC25	mRNA
ENSG00000152583	0.0450204	0.999529	0.998694	1.00037	0.269781	SPARCL1	mRNA
ENSG00000152760	0.39687	0.985743	0.880281	1.10384	0.803574	DYNLT5	mRNA
ENSG00000154065	0.912153	0.987015	0.940973	1.03531	0.591786	ANKRD29	mRNA
ENSG00000154380	0.00202234	1.01647	1.0078	1.0252	0.000183983	ENAH	mRNA
ENSG00000154839	0.00251799	1.03299	1.01815	1.04805	1.10761e-05	SKA1	mRNA
ENSG00000154928	0.521321	1.06697	0.694916	1.63822	0.766999	EPHB1	mRNA
ENSG00000156298	0.279411	1.0075	0.996562	1.01856	0.17968	TSPAN7	mRNA
ENSG00000156510	0.216054	1.00358	0.999465	1.00772	0.0882271	HKDC1	mRNA
ENSG00000156535	0.0545198	1.04891	1.02416	1.07426	8.86719e-05	CD109	mRNA
ENSG00000156970	0.00559192	1.056	1.03427	1.07818	2.80672e-07	BUB1B	mRNA
ENSG00000157379	0.000119437	0.991731	0.983882	0.999643	0.0405596	DHRS1	mRNA
ENSG00000158169	0.0607429	1.01695	0.983128	1.05193	0.330104	FANCC	mRNA
ENSG00000158406	0.0496522	1.00552	0.995815	1.01532	0.266049	H4C8	mRNA
ENSG00000158806	0.852712	0.995725	0.97401	1.01792	0.703309	NPM2	mRNA
ENSG00000158882	0.00875479	1.02281	1.01376	1.03195	6.61258e-07	TOMM40L	mRNA
ENSG00000160323	0.548835	1.00556	0.950513	1.0638	0.846937	ADAMTS13	mRNA
ENSG00000160339	0.0834791	0.996681	0.985395	1.0081	0.567205	FCN2	mRNA
ENSG00000160801	0.16967	0.997243	0.971236	1.02395	0.837742	PTH1R	mRNA
ENSG00000160957	0.00199164	1.00711	1.00119	1.01306	0.0185264	RECQL4	mRNA
ENSG00000161800	0.000717164	1.03164	1.01992	1.04349	9.03164e-08	RACGAP1	mRNA
ENSG00000161888	0.000680478	1.01487	1.00122	1.0287	0.0326658	SPC24	mRNA
ENSG00000162004	0.430097	1.06446	0.95193	1.19029	0.273168	CCDC78	mRNA
ENSG00000162407	0.220771	0.995844	0.990057	1.00166	0.161292	PLPP3	mRNA
ENSG00000162595	0.525596	0.96258	0.903874	1.0251	0.234892	DIRAS3	mRNA
ENSG00000162688	0.809628	0.98978	0.967624	1.01244	0.3738	AGL	mRNA
ENSG00000162769	0.000655409	1.07894	1.04758	1.11125	4.44893e-07	FLVCR1	mRNA
ENSG00000163631	0.299245	0.999995	0.999988	1	0.158304	ALB	mRNA
ENSG00000163687	1.31738e-05	0.976568	0.961545	0.991827	0.00272242	DNASE1L3	mRNA
ENSG00000163738	0.606129	1.01721	0.98855	1.0467	0.241945	MTHFD2L	mRNA
ENSG00000164039	0.188977	0.995828	0.980172	1.01173	0.605072	BDH2	mRNA
ENSG00000164100	0.016988	1.33803	0.239061	7.48894	0.740348	NDST3	mRNA
ENSG00000164171	0.0336372	1.03764	1.00842	1.0677	0.0112251	ITGA2	mRNA
ENSG00000164237	0.694403	0.999088	0.997301	1.00088	0.31749	CMBL	mRNA
ENSG00000164619	0.318533	0.98344	0.7741	1.24939	0.891239	BMPER	mRNA
ENSG00000164841	0.0969709	1.13429	1.04829	1.22735	0.00173549	TMEM74	mRNA
ENSG00000165304	0.00112888	1.04715	1.02958	1.06502	9.41158e-08	MELK	mRNA
ENSG00000165490	0.00993629	1.30442	1.18411	1.43695	7.33046e-08	DDIAS	mRNA
ENSG00000165682	0.0642074	0.918054	0.784442	1.07442	0.286683	CLEC1B	mRNA
ENSG00000165757	0.198927	1.01	1.00214	1.01791	0.0125524	JCAD	mRNA
ENSG00000165841	0.404269	1.02763	1.00201	1.0539	0.0343507	CYP2C19	mRNA
ENSG00000166415	0.581402	0.997984	0.988084	1.00798	0.691527	WDR72	mRNA
ENSG00000166856	0.00982429	0.746384	0.564137	0.987508	0.0405627	GPR182	mRNA
ENSG00000167183	0.978264	0.998923	0.993935	1.00394	0.673094	PRR15L	mRNA
ENSG00000168398	0.537648	0.983895	0.947279	1.02193	0.401421	BDKRB2	mRNA
ENSG00000168679	0.0152782	0.979198	0.939516	1.02056	0.319274	SLC16A4	mRNA
ENSG00000169032	0.373016	1.00777	0.996683	1.01897	0.170324	MAP2K1	mRNA
ENSG00000169607	0.00146178	1.10326	1.05854	1.14987	3.2397e-06	CKAP2L	mRNA
ENSG00000169679	0.000357856	1.07719	1.04821	1.10697	9.12059e-08	BUB1	mRNA
ENSG00000169855	0.012372	1.00917	1.00402	1.01435	0.000468732	ROBO1	mRNA
ENSG00000170312	4.74807e-05	1.02013	1.01199	1.02833	1.07859e-06	CDK1	mRNA
ENSG00000170323	0.121086	0.999389	0.99699	1.00179	0.618058	FABP4	mRNA
ENSG00000170509	0.00505378	0.999369	0.998567	1.00017	0.123578	HSD17B13	mRNA
ENSG00000172425	0.00670597	0.996148	0.99252	0.99979	0.0381821	TTC36	mRNA
ENSG00000173702	0.394223	0.999992	0.999384	1.0006	0.980466	MUC13	mRNA
ENSG00000173894	0.0051703	1.06448	1.04138	1.08809	2.3821e-08	CBX2	mRNA
ENSG00000173930	0.0594323	1.00744	0.983035	1.03246	0.55341	SLCO4C1	mRNA
ENSG00000174059	0.391726	0.992126	0.968857	1.01595	0.513872	CD34	mRNA
ENSG00000174371	5.96482e-05	1.09231	1.05748	1.12828	9.24459e-08	EXO1	mRNA
ENSG00000174992	0.155643	0.987061	0.969653	1.00478	0.151398	ZG16	mRNA
ENSG00000175643	0.000388134	1.02184	1.00749	1.0364	0.00275235	RMI2	mRNA
ENSG00000176208	0.00380457	1.15553	1.0517	1.26961	0.00261807	ATAD5	mRNA
ENSG00000176595	0.00935539	0.982765	0.923169	1.04621	0.585965	KBTBD11	mRNA
ENSG00000176771	0.829241	1.21331	1.02169	1.44086	0.0274789	NCKAP5	mRNA
ENSG00000178999	0.00512856	1.01093	1.00609	1.01579	8.92582e-06	AURKB	mRNA
ENSG00000179914	0.31641	1.0193	0.997198	1.04189	0.0874353	ITLN1	mRNA
ENSG00000180176	0.935396	0.996095	0.69885	1.41977	0.982736	TH	mRNA
ENSG00000180745	0.83477	0.999241	0.994765	1.00374	0.740407	CLRN3	mRNA
ENSG00000182566	0.47743	0.996791	0.980671	1.01318	0.699217	CLEC4G	mRNA
ENSG00000182853	0.0632804	1.00982	0.994793	1.02507	0.201461	VMO1	mRNA
ENSG00000182919	0.459756	0.998069	0.990333	1.00586	0.626232	C11orf54	mRNA
ENSG00000183091	0.325071	1.01901	0.995274	1.04331	0.117362	NEB	mRNA
ENSG00000183230	0.00362461	0.885634	0.644015	1.2179	0.454951	CTNNA3	mRNA
ENSG00000183615	0.160733	0.985918	0.965436	1.00683	0.185471	FAM167B	mRNA
ENSG00000183856	0.000818789	1.05077	1.03247	1.06939	3.31646e-08	IQGAP3	mRNA
ENSG00000184162	0.0123583	1.00832	1.0021	1.01458	0.00863798	NR2C2AP	mRNA
ENSG00000184357	0.0177151	1.05899	0.897108	1.25008	0.498323	H1-5	mRNA
ENSG00000184445	0.00802847	1.06508	1.0323	1.0989	7.69866e-05	KNTC1	mRNA
ENSG00000184601	0.661851	1.01074	0.965159	1.05847	0.650071	C14orf180	mRNA
ENSG00000184661	0.000509167	1.14299	1.09094	1.19754	1.91532e-08	CDCA2	mRNA
ENSG00000185130	0.0841536	1.08414	0.87019	1.3507	0.471347	H2BC13	mRNA
ENSG00000185480	0.00135813	1.14765	1.07732	1.22258	1.9726e-05	PARPBP	mRNA
ENSG00000186642	0.000116269	0.88309	0.808789	0.964216	0.00556094	PDE2A	mRNA
ENSG00000186648	0.998346	1.03183	0.99157	1.07373	0.122812	CARMIL3	mRNA
ENSG00000186871	0.00256922	1.2365	1.14782	1.33203	2.25924e-08	ERCC6L	mRNA
ENSG00000189057	0.0265475	1.03919	1.01891	1.05987	0.000131495	FAM111B	mRNA
ENSG00000196083	0.0192049	1.00947	0.990674	1.02862	0.325656	IL1RAP	mRNA
ENSG00000196169	0.619417	0.749975	0.347767	1.61735	0.463085	KIF19	mRNA
ENSG00000196747	0.265697	0.995341	0.953255	1.03929	0.832229	H2AC13	mRNA
ENSG00000196932	0.472131	1.63555	1.1006	2.43051	0.0149224	TMEM26	mRNA
ENSG00000197272	0.0495881	0.978295	0.959841	0.997104	0.0239197	IL27	mRNA
ENSG00000198074	0.012773	1.00021	1.0001	1.00032	0.000201925	AKR1B10	mRNA
ENSG00000198554	0.000597745	1.14736	1.09213	1.20538	4.72609e-08	WDHD1	mRNA
ENSG00000198758	0.00561806	1.01631	1.00983	1.02283	7.0918e-07	EPS8L3	mRNA
ENSG00000198797	0.367448	3.82208	1.13734	12.8443	0.030154	BRINP2	mRNA
ENSG00000198826	0.0155141	1.05706	1.02692	1.08808	0.000169925	ARHGAP11A	mRNA
ENSG00000198886	0.118181	0.99999	0.999974	1.00001	0.215357	MT-ND4	mRNA
ENSG00000198899	0.184057	0.999986	0.999964	1.00001	0.228336	MT-ATP6	mRNA
ENSG00000198901	0.00192181	1.02666	1.01365	1.03983	5.25764e-05	PRC1	mRNA
ENSG00000198947	0.626268	1.0236	0.982985	1.06589	0.258829	DMD	mRNA
ENSG00000203972	0.21215	1.02547	0.760141	1.38342	0.869214	GLYATL3	mRNA
ENSG00000204291	0.063104	0.995266	0.979361	1.01143	0.563744	COL15A1	mRNA
ENSG00000204366	0.00492486	1.04297	1.01929	1.0672	0.00032968	ZBTB12	mRNA
ENSG00000205143	0.715654	0.996805	0.97425	1.01988	0.784023	ARID3C	mRNA
ENSG00000205707	0.0200728	0.992798	0.977649	1.00818	0.356918	ETFRF1	mRNA
ENSG00000212907	0.00960185	0.999946	0.999904	0.999988	0.0116993	MT-ND4L	mRNA
ENSG00000213398	8.89448e-05	0.991164	0.986109	0.996246	0.000670104	LCAT	mRNA
ENSG00000214954	0.100318	1.04865	0.857151	1.28293	0.644281	LRRC69	mRNA
ENSG00000225556	0.902397	1.02074	0.796113	1.30874	0.871407	C2CD4D	mRNA
ENSG00000228253	0.0312331	0.999941	0.999892	0.999989	0.016877	MT-ATP8	mRNA
ENSG00000237649	1.08488e-05	1.02182	1.01348	1.03022	2.43375e-07	KIFC1	mRNA
ENSG00000241224	0.0520249	0.901926	0.82247	0.989057	0.0282489	C3orf85	mRNA
ENSG00000241935	0.114424	0.983258	0.965011	1.00185	0.077301	HOGA1	mRNA
ENSG00000257008	0.075582	2.12368	0.142266	31.7013	0.585016	GPR142	mRNA
ENSG00000273079	0.1108	0.443225	0.0638594	3.07627	0.410419	GRIN2B	mRNA
